# Supplementary material for: Child Health CheckPoint: cohort summary and methodology of a physical health and biospecimen module for the Longitudinal Study of Australian Children
Source: PubMed Central journal article supplement — BMJ Open. 2019 Jul 4;9(Suppl 3):3–22. doi: 10.1136/bmjopen-2017-020261 (PMC6624028; doi:10.1136/bmjopen-2017-020261), 2019-07-04
Supplement: bmjopen-2017-020261.draft_revisions.pdf [file bmjopen-2017-020261.draft_revisions.pdf]

# BMJ Open

BMJ Open is committed to open peer review. As part of this commitment we make the peer review history of every article we publish publicly available.

When an article is published we post the peer reviewers' comments and the authors' responses online. We also post the versions of the paper that were used during peer review. These are the versions that the peer review comments apply to.

The versions of the paper that follow are the versions that were submitted during the peer review process. They are not the versions of record or the final published versions. They should not be cited or distributed as the published version of this manuscript.

BMJ Open is an open access journal and the full, final, typeset and author-corrected version of record of the manuscript is available on our site with no access controls, subscription charges or pay-per-view fees (<http://bmjopen.bmj.com>).

If you have any questions on BMJ Open's open peer review process please email [editorial.bmjopen@bmj.com](mailto:editorial.bmjopen@bmj.com)

# BMJ Open

## Growing Up in Australia's Child Health CheckPoint cohort summary and methodology

|                               |                                                                                                                                                                                                                                                                                                                                                           |
|-------------------------------|-----------------------------------------------------------------------------------------------------------------------------------------------------------------------------------------------------------------------------------------------------------------------------------------------------------------------------------------------------------|
| Journal:                      | <i>BMJ Open</i>                                                                                                                                                                                                                                                                                                                                           |
| Manuscript ID                 | bmjopen-2017-020261                                                                                                                                                                                                                                                                                                                                       |
| Article Type:                 | Research                                                                                                                                                                                                                                                                                                                                                  |
| Date Submitted by the Author: | 25-Oct-2017                                                                                                                                                                                                                                                                                                                                               |
| Complete List of Authors:     | Clifford, Susan; Murdoch Childrens Research Institute, Centre for Community Child Health; The University of Melbourne, Department of Paediatrics<br>Davies, Sarah; Murdoch Childrens Research Institute, Centre for Community Child Health<br>Wake, Melissa; Murdoch Childrens Research Institute; The University of Melbourne, Department of Paediatrics |
| Keywords:                     | Longitudinal studies, non-communicable disease, biological specimen bank, phenotype, cohort profile, reference values                                                                                                                                                                                                                                     |
|                               |                                                                                                                                                                                                                                                                                                                                                           |

SCHOLARONE™  
Manuscripts

## ***Growing Up in Australia's Child Health CheckPoint cohort summary and methodology.***

Susan A. Clifford<sup>1,2</sup>, Sarah Davies<sup>1</sup> and Melissa Wake<sup>1-3</sup>, on behalf of the Child Health CheckPoint Team.

Child Health CheckPoint Team: Peter S. Azzopardi<sup>1,2,4</sup>, Louise A. Baur<sup>5</sup>, David P. Burgner<sup>1,2,6</sup>, John B. Carlin<sup>1,2</sup>, Michael Cheung<sup>1,2,7</sup>, Terence Dwyer<sup>1,2,8,9</sup>, Ben Edwards<sup>10</sup>, Susan Ellul<sup>1</sup>, Alanna N. Gillespie<sup>1,2</sup>, Lisa Gold<sup>11</sup>, Anneke C. Grobler<sup>1</sup>, Jessica A. Kerr<sup>1,2</sup>, Kate Lycett<sup>1,2</sup>, Katherine Lange<sup>1</sup>, Fiona K. Mensah<sup>1,2</sup>, Tim S. Olds<sup>1,12</sup>, Sarath Ranganathan<sup>1,2,13</sup>, Helen Rogers<sup>14</sup>, Richard Saffery<sup>1,2</sup>, Michael Sawyer<sup>15,16</sup>, Peter J. Simm<sup>1,2,17</sup>, Luke Stevens<sup>1</sup>, Tien Y. Wong<sup>18-20</sup> and Stephen R. Zubrick<sup>21,22</sup>.

**Affiliations:** <sup>1</sup>Murdoch Children's Research Institute, Parkville, Victoria, Australia; <sup>2</sup>Department of Paediatrics, The University of Melbourne, Parkville, Victoria, Australia; <sup>3</sup>Department of Paediatrics and The Liggins Institute, The University of Auckland, Grafton, Auckland, New Zealand; <sup>4</sup>Maternal and Child Health Program, International Development Discipline, Burnet Institute, Melbourne, Victoria, Australia; <sup>5</sup>The Discipline of Child and Adolescent Health, The University of Sydney, Westmead, New South Wales, Australia; <sup>6</sup>Department of Paediatrics, Monash University, Clayton, Victoria, Australia; <sup>7</sup>Cardiology Department, The Royal Children's Hospital, Parkville, Victoria, Australia; <sup>8</sup>Nuffield Department of Obstetrics and Gynaecology, The George Institute for Global Health, University of Oxford, Oxford, United Kingdom. <sup>9</sup>Institute for Medical Research, University of Tasmania, Hobart, Tasmania, Australia; <sup>10</sup>Australian National University Centre for Social Research and Methods, Canberra, Australian Capital Territory, Australia; <sup>11</sup>School of Health and Social Development, Deakin University, Geelong, Victoria, Australia; <sup>12</sup>Alliance for Research in Exercise, Nutrition and Activity, University of South Australia, Adelaide, South Australia, Australia; <sup>13</sup>Respiratory and Sleep Medicine Department, The Royal Children's Hospital, Parkville, Victoria, Australia; <sup>14</sup>National Centre for Longitudinal Data, Department of Social Services, Canberra, Australian Capital Territory, Australia; <sup>15</sup>School of Medicine, University of Adelaide, Adelaide, South Australia, Australia; <sup>16</sup>Research and Evaluation Unit, Women's and Children's Health Network, Adelaide, South Australia, Australia; <sup>17</sup>Endocrinology and Diabetes Department, The Royal Children's Hospital, Parkville, Victoria, Australia; <sup>18</sup>Singapore Eye Research Institute, Singapore National Eye Centre, Singapore; <sup>19</sup>Department of Ophthalmology, Yong Loo Lin School of Medicine, National University of Singapore and National University Health System, Singapore; <sup>20</sup>Ophthalmology

1  
2  
3 and Visual Sciences Academic Clinical Programme, Duke-NUS Medical School, National  
4 University of Singapore, Singapore; <sup>21</sup>Telethon Kids Institute, Subiaco, Western Australia,  
5 Australia. <sup>22</sup>Graduate School of Education, University of Western Australia, Crawley,  
6 Western Australia, Australia.  
7  
8  
9

10  
11 **Correspondence to:** Professor Melissa Wake,  
12 Murdoch Children's Research Institute  
13 The Royal Children's Hospital  
14 50 Flemington Road, Parkville 3052, VIC Australia.  
15 Telephone: +61 3 9345 5761  
16 Email: [melissa.wake@mcri.edu.au](mailto:melissa.wake@mcri.edu.au)  
17  
18  
19  
20  
21

22 **Keywords:** Cohort profile; non-communicable disease; biological specimen bank;  
23 phenotype; reference values; parents; children; epidemiologic studies; cross-sectional studies;  
24 longitudinal studies.  
25  
26  
27

28  
29 **Word count:** 3999  
30  
31

32 **Abbreviations:** ABS: Australian Bureau of Statistics; ACR: albumin-creatinine ratio;  
33 AQL-8D: Assessment of Quality of Life 8D; BIA: Bioelectrical impedance analysis; BP:  
34 Blood pressure; Ca: California, USA; ECHO: US Environmental Influences On Child Health  
35 Outcomes Program; FrACT: Freiburg Visual Acuity and Contrast Test; ISCW: International  
36 Survey of Children's Wellbeing; kHz: kilohertz; LiH: Lithium Heparin; LiSN-S: Listening in  
37 Spatialised Noise – Sentence Test; LSAC: Longitudinal Study of Australian Children;  
38 MARCA: Multimedia Activity Recall for Children and Adults; MCRI: Murdoch Children's  
39 Research Institute; NaSSDA: National Secondary Students' Diet and Activity; NCD: non-  
40 communicable disease(s); NHMRC: Australian National Health and Medical Research  
41 Council; NIH: National Institutes of Health; NMR: nuclear magnetic resonance; NSW: New  
42 South Wales, Australia; NPVT: National Institute of Health Picture Vocabulary test; pQCT:  
43 Peripheral quantitative computed tomography; PedsQL: Pediatric Quality of Life; REDCap:  
44 Research Electronic Data Capture; SD: standard deviation; UK: United Kingdom; USA:  
45 United States of America; VO<sub>2</sub>max: Maximum volume of oxygen consumed; 2D: Two  
46 dimensional; 3D: Three dimensional.  
47  
48  
49  
50  
51  
52  
53  
54  
55  
56  
57  
58  
59  
60

## ABSTRACT

**Objectives:** *'Growing Up in Australia: The Longitudinal Study of Australian Children'* (LSAC) is Australia's only nationally-representative children's longitudinal study, focusing on social, economic, physical and cultural impacts on health, learning, social and cognitive development. LSAC's first decade collected wide-ranging repeated psychosocial and administrative data; here, we describe the Child Health CheckPoint, LSAC's dedicated biophysical module.

**Design, setting, participants:** LSAC recruited a cross-sequential sample of  $\approx 5000$  0-1 and  $\approx 5000$  4-5 year olds in 2004, since completing seven biennial visits. CheckPoint was a cross-sectional wave that travelled Australia in 2015-16, to reach LSAC's younger cohort at age 11-12 years between LSAC waves 6 and 7. Parent-child pairs participated in comprehensive assessments at 15 assessment centres nationwide or, if unable to attend, a shorter home visit.

**Measures:** CheckPoint's intergenerational, multidimensional measures were prioritised to show meaningful variation within normal ranges and capture non-communicable disease (NCD) phenotype precursors. These included anthropometry, physical activity, fitness, time use, vision, hearing, and cardiovascular, respiratory and bone health. Biospecimens included blood, saliva, buccal swabs (also from second parent), urine, hair and toenails. The epidemiology and parent-child concordance of many measures are described in separate papers.

**Results:** 1874 (54% of eligible) parent-child pairs and 1051 second parents participated. Participants' geographical distribution mirrored the broader Australian population; however, mean socioeconomic position and parental education were higher and fewer reported non-English speaking or Indigenous backgrounds. Completeness was uniformly high for phenotypic data ( $>92\%$  of eligible), biospecimens (74-97%) and consent (genetic analyses 98%, accessing neonatal blood spots 97%, sharing 96%).

**Conclusions:** CheckPoint enriches LSAC to study how NCDs develop at the molecular and phenotypic levels before overt disease emerges, and clarify the underlying dimensionality of health at different life stages. Data can be examined as outcomes of early life exposures (LSAC waves 1-6) and predictors of later life health (waves 7 onward).

## ARTICLE SUMMARY

### Strengths and limitations of this study

- The Child Health CheckPoint aimed to enrich the ongoing Longitudinal Study of Australian Children (LSAC) with sophisticated health assessments and biological samples.
- Strengths include LSAC's existing rich decade-long exposure and administrative data for the child and both parents, and CheckPoint's collection of cross-generational parent-child assessments paired on time/date of assessment, protocols and equipment; timing of the module to capture early adolescence; and timely public release of data to researchers (within two years of collection).
- Families living in regional areas or with lower socioeconomic positions are under-represented; however, sample weights are available that enable analyses that are more reflective of the original design sample of Australian children and their families.
- For each child participant, only one parent (predominantly the mother) undertook the detailed paired assessments, but the second parent contributed a buccal (DNA) sample, where possible.
- Access policies are in place for future extraction of extensive additional data from the digital and biospecimen repositories held at the Murdoch Children's Research Institute.

## INTRODUCTION

Worldwide there is a large and growing burden of non-communicable diseases (NCDs). Many have their genesis in early life, and develop over decades of cumulative exposures. This provides opportunities to prevent, slow or alter disease trajectories at multiple points of the lifecourse. Wide gradients within the normal range of phenotypes relevant to many later NCDs are already measurable across many body systems from childhood.

It is evident that family, social and other environmental factors interact with an individual's innate biology (including genetic profile) to create modifiable pathways (such as chronic inflammation) common to multiple NCDs.<sup>1</sup> Shonkoff's biodevelopmental framework of lifecourse determinants of health and their mechanisms proposes that health-promoting and health-threatening environmental effects interact with genes and affect later health, via physiological adaptations during sensitive periods and cumulative effects over time.<sup>1</sup> These physiological adaptations are the key intermediary step, which may be measured years or decades before overt ill health develops.

'Big picture' research into physiological adaptations and objective health outcomes has shifted from narrowly-focused hypothesis-driven studies with a single outcome, towards multidisciplinary and/or multidimensional research with outcomes across multiple domains that recognise the interconnectedness of health.<sup>2 3</sup> Around the start of the millennium, many countries launched large-scale birth cohort studies (eg UK Millennium Cohort,<sup>4</sup> Growing Up in Ireland,<sup>5</sup> New Zealand,<sup>6</sup> Singapore<sup>7</sup>). Australia's study, *Growing Up in Australia: The Longitudinal Study of Australian Children (LSAC)* was intended to provide a strong evidence base for policy development and service delivery on a wide range of issues relating to children's development and lifetime wellbeing.<sup>8</sup>

LSAC is broad in scope, surveying lifetime pathways in health, learning and development. Its design incorporates frequent (biennial) and ongoing data collection; multiple study respondents; linkage to lifetime universal parent and child administrative data including health care (eg lifetime primary health services, medication prescriptions dispensed), education (eg national literacy and numeracy exam results) and census datasets; and open access to the datasets for researchers. The federal government investment into LSAC is yielding major returns that influence policy,<sup>9</sup> with several hundred publications in the first decade of the study (listed at <http://flosse.fahcsia.gov.au/>).

1  
2  
3 LSAC is a population-based cohort study from early childhood, and is the country's only  
4 nationally-representative children's longitudinal study. Adopting a dual cross-sequential  
5 design, LSAC recruited two cohorts in 2004, each comprising ~5000 children. At  
6 recruitment, the K cohort children were aged 4-5 years, and B cohort 0-1 year old. A two-  
7 stage clustered sampling design was applied, first randomly selecting 10% of postcodes  
8 (stratified by state and urban/rural locations), then in-age children within those postcodes  
9 from the Medicare database.<sup>10</sup> Medicare is an Australian government program within the  
10 universal health care system that reduces or covers medical visit and medication costs, into  
11 which 98% of children are enrolled by their first birthday.<sup>10</sup> Very remote postcodes and those  
12 with <20 children (n=874 postcodes, 3.2% of population) were excluded. Since 2004, there  
13 have been seven biennial waves of data collection via a 90 minute home interview,  
14 questionnaires (children, both parents, teachers) and time diaries. The B cohort included 5107  
15 families (57.2% uptake) in its first wave, with 74% retention at wave 6 (Figure 1).

24 Like other government-implemented children's studies internationally, LSAC has mainly  
25 focused on psychosocial and demographic exposures, with all health items except  
26 anthropometry and blood pressure being parent- or self-reported. A physical health and  
27 biospecimens module was beyond the scope of the original study design. There was also  
28 uncertainty as to how such a biomarker module might impact (whether positively or  
29 negatively) on cohort retention and engagement.

34 To address this gap, we recently introduced an intergenerational physical health and  
35 biomarkers module, the Child Health CheckPoint. This one-off cross-sectional wave, nested  
36 between LSAC waves 6 and 7, was offered to the B cohort at child age 11-12 years.  
37 CheckPoint's intergenerational, multidimensional measures were prioritised to show  
38 meaningful variation within normal ranges and capture non-communicable disease (NCD)  
39 phenotype precursors both in adults and children. Wherever possible we captured raw digital  
40 data (eg images, traces) that would support additional extraction and analysis beyond the core  
41 phenotypic summary data (eg blood pressure readings). The broad set of paired measures,  
42 collected on parent-child dyads on the same day with identical equipment, was designed to  
43 allow researchers to simultaneously examine multiple phenotypes in both ages as well as the  
44 intergenerational transmission of health. In this paper, we describe the Child Health  
45 CheckPoint methods and sample characteristics. This allows researchers to understand and  
46 make best use of the robust dataset and biospecimens. Other papers in this BMJ Open Special



Issue explore the epidemiology and parent-child concordance of individual measures in greater depth.<sup>11-24</sup>

## METHODS

**Study design:** LSAC is a longitudinal child cohort study conducted in partnership between the Australian Government Department of Social Services, the Australian Institute of Family Studies and the Australian Bureau of Statistics. It is funded by the Australian Government.

The Child Health CheckPoint was conducted between February 2015 and March 2016, at child age 11-12 years. In a context of limited funding, the CheckPoint was offered to the B cohort because: (a) it contains more detailed pregnancy and birth data; (b) LSAC's data collections span the children's entire postnatal lives; (c) by this child age, there is a wide range in normal values of risk factors predicting adult preclinical markers of disease; and (d) experience suggested that the health measurements would be of greater interest (and so attract higher uptake) to children and parents at this age than to the K-cohort of 15–16 year olds, an age when many birth cohorts experience heightened attrition.

**Study development:** In 2007, the Department of Social Services commissioned a scoping report on the potential value, content and cost of a physical health and biomarkers module.<sup>25</sup> A partnership was formed between LSAC senior management, LSAC researchers and child health researchers new to LSAC with physical health and biomarkers content expertise. In 2012, researchers at the Murdoch Children's Research Institute (MCRI) partnered with investigators at the University of South Australia, University of Adelaide and Deakin University to form the CheckPoint Investigator Team and to lead a successful application to the Australian National Health and Medical Research Council (NHMRC Project Grant 1041352, 2013-17). This core funding enabled the child cardiorespiratory measures and leveraged additional institutional, competitive (NHMRC Project Grant 1109355, 2016-2020) and philanthropic funding, such that the CheckPoint ultimately encompassed a much wider range of health domains underpinning NCDs across two generations.

Feasibility of core CheckPoint assessments were tested in 2014 within the '3C' study; a longitudinal study of  $\approx 380$  7-17 year olds in the MCRI's existing PEAS,<sup>26</sup> LEAP2<sup>27</sup> and HopSCOTCH<sup>28</sup> cohorts examining cardiovascular outcomes of lifecourse growth, diet and activity.<sup>29 30</sup>

Late in 2014, we tested the CheckPoint protocol with a vanguard of  $\approx 50$  Victorian LSAC families to fine-tune recruitment, visit flow, timing and feasibility, and test acceptability of

1  
2  
3 the centre-based suite of measures ahead of the much larger bulk of children due to attend in  
4 2015-16. Child and parent participants prospectively rated enjoyment of each assessment and  
5 overall impressions (scored out of 10). Participants were also asked to rate how the  
6 CheckPoint module changed their feeling about being in LSAC overall, from 0 (Now I like it  
7 much less) to 10 (Now I like it much more).  
8  
9

10  
11 **Participants:** LSAC B cohort families who completed a wave 6 home interview were  
12 eligible. The study child and one parent were invited to participate in comprehensive health  
13 assessments at an assessment centre or home visit. Choice of parent and whether or not  
14 biological was determined by the family; in practice this 'attending parent' was usually the  
15 mother. Second biological parents living with the child, if available, were also invited to  
16 participate after the visit by contributing a buccal swab.  
17  
18

19  
20  
21 **Ethical approval and consent:** The CheckPoint study was approved by The Royal  
22 Children's Hospital Melbourne Human Research Ethics Committee (33225D) and the  
23 Australian Institute of Family Studies Ethics Committee (14-26); the latter also provides  
24 ethical review and approval for LSAC at every wave. A parent or guardian provided written  
25 consent for their own and their child's participation in the study. Optional consent was  
26 requested for the collection, storage and non-genetic analysis of biospecimens; genetic  
27 analyses of these samples; sharing images and samples with other researchers; and access to  
28 the child's birth data and dried newborn heel-prick blood samples that are stored indefinitely  
29 by most Australian states. Non-attending biological parents provided written consent for the  
30 storage and non-genetic analysis of their buccal swab, and optional consent for genetic  
31 analysis was requested. Participants were aware that no health, genetic or other information  
32 would be returned to them, beyond a summary of physical health measurements (body mass  
33 index, blood pressure, etc.) provided at the end of the visit.  
34  
35  
36  
37  
38  
39  
40  
41  
42

43 **Procedure:** Participation in the CheckPoint involved (i) an assessment centre or home visit  
44 for the child and attending parent, (ii) follow-up phone interview for the child, (iii) a week of  
45 wearing an accelerometer (physical activity monitor) for the child and attending parent, and  
46 (iv) a buccal (DNA) sample collection at home for the non-attending parent.  
47  
48  
49

50 *Sample recruitment:* B cohort families were briefly introduced to the upcoming Child Health  
51 CheckPoint during the LSAC wave 6 home interview in 2014. A total of 3513 families (93%  
52 of wave 6 families and 69% of original cohort, see figure 1) gave written consent to be  
53 contacted by the CheckPoint team.  
54  
55  
56  
57

1  
2  
3 *Assessment visit types and locations:* The core CheckPoint data collection mechanism was  
4 the 'pop-up' Main Assessment Centre, set up in seven major Australian cities (supplementary  
5 figure 1) sequentially for between 2-8 weeks before being packed up and transported by road  
6 to the next location. On each operating day, up to 24 families were invited to attend the  
7 assessment centre for a 3½-hour visit.  
8  
9

10  
11 Road transport between Australian cities can take days. To maximise the size and geographic  
12 reach of the sample, 'pop-up' Mini Assessment Centres operated in eight regional cities for up  
13 to a week while the bulk of equipment was in transit. The 2¾-hour Mini Assessment Centre  
14 visit included most of the assessments offered at the Main Assessment Centres, except those  
15 requiring large equipment unable to be checked in as personal luggage on commercial flights.  
16 Those unable to attend an assessment centre were offered a 1½-hour home visit with a subset  
17 of measures that could be conducted in the home by a research assistant (ie not a  
18 phlebotomist) using portable equipment. Home visits occurred in Main Assessment and Mini  
19 Assessment Centre cities, and other regional towns.  
20  
21

22  
23 In total, the study visited over 30 cities and towns over the one-year data collection period  
24 (supplementary figure 1). Table 1 reports the assessments offered at each visit type, and  
25 figure 1 the sample size per visit type.  
26  
27  
28  
29  
30  
31  
32  
33  
34  
35  
36  
37  
38  
39  
40  
41  
42  
43  
44  
45  
46  
47  
48  
49  
50  
51  
52  
53  
54  
55  
56  
57  
58  
59  
60

Table 1. Summary of measurements and biological samples collected in CheckPoint assessments

| Construct & Measure                                       | Main Mini Home |      |      | Station | Equipment/instrument* | Data/sample collection protocol in brief |                                                                                                                             |                                                                                                                                                                                        |
|-----------------------------------------------------------|----------------|------|------|---------|-----------------------|------------------------------------------|-----------------------------------------------------------------------------------------------------------------------------|----------------------------------------------------------------------------------------------------------------------------------------------------------------------------------------|
|                                                           | Ch P           | Ch P | Ch P |         |                       |                                          |                                                                                                                             |                                                                                                                                                                                        |
| <b>Anthropometry</b>                                      |                |      |      |         |                       |                                          |                                                                                                                             |                                                                                                                                                                                        |
| Height <sup>31 32</sup>                                   | ●              | ●    | ●    | ●       | ●                     | ●                                        | Portable rigid stadiometer (Invicta IP0955, Leicester, UK).                                                                 | Standing height without shoes or socks, measured x2, or x3 if first two measures differed by $\geq 0.5$ cm.                                                                            |
| Weight and body composition <sup>31 32</sup>              | ●              | ●    | ●    | ●       | ●                     | ●                                        | 4-limb segmental (InBody230, Biospace, Seoul, Korea) or 2-limb (Tanita BC-351, Kewdale, Australia) body composition scales. | Weight and body composition wearing light clothing without shoes or socks, measured once.                                                                                              |
| Waist circumference <sup>31 32</sup>                      | ●              | ●    | ●    | ●       | ●                     | ●                                        | Steel anthropometric measuring tape (Lufkin Executive Diameter W606PM, Maryland, USA).                                      | Waist circumference at the narrowest point between the 10th rib and iliac crest, or midpoint between if no visible narrowing. Measured x2, or x3 if first two differed by $\geq 1$ cm. |
| <b>Pubertal status</b>                                    |                |      |      |         |                       |                                          |                                                                                                                             |                                                                                                                                                                                        |
| Pubertal development                                      | ●              | ●    | ●    | ●       | ●                     | ●                                        | Sexual Maturity Scale. <sup>33</sup><br>Pubertal Development Scale. <sup>34</sup>                                           | Sexual maturity assessed using three sets of images (1 male and 2 female) showing stages of puberty.<br>Pubertal progress assessed using five sex-specific questions.                  |
| Menstruation                                              | ●              | ●    | ●    | ●       | ●                     | ●                                        | Study-designed questions about menstruation.                                                                                | Self-reported current menstruation (females only).<br>Age of menstruation onset (girls only).                                                                                          |
| Acne                                                      | ●              | ●    | ●    | ●       | ●                     | ●                                        | Modified Comprehensive Acne Severity Scale for the face. <sup>35</sup>                                                      | Current acne severity assessed using a sex-specific 5-point pictorial scale.                                                                                                           |
| <b>Bone and muscle measures</b>                           |                |      |      |         |                       |                                          |                                                                                                                             |                                                                                                                                                                                        |
| Bone and muscle morphology, bone density <sup>36 37</sup> | ●              | ●    | ●    | ●       | ●                     | ●                                        | Peripheral quantitative computed tomography (pQCT, Stratec XCT 2000L scanner and XCT 2000 software, Birkenfeld, Germany).   | Two pQCT scans of the non-dominant lower leg to image bone and muscle density and morphology.<br>Scans taken at 4% (above ankle) and 66% (mid-calf) length of the tibia.               |

| Construct & Measure                                                | Main Mini Home |      |      | Station | Equipment/instrument*                                                                                                                                                                                                                                      | Data/sample collection protocol in brief                                                                                                                                                                                     |
|--------------------------------------------------------------------|----------------|------|------|---------|------------------------------------------------------------------------------------------------------------------------------------------------------------------------------------------------------------------------------------------------------------|------------------------------------------------------------------------------------------------------------------------------------------------------------------------------------------------------------------------------|
|                                                                    | Ch P           | Ch P | Ch P |         |                                                                                                                                                                                                                                                            |                                                                                                                                                                                                                              |
| <b>Cardiovascular measures</b>                                     |                |      |      |         |                                                                                                                                                                                                                                                            |                                                                                                                                                                                                                              |
| Carotid intima-media thickness and distensibility <sup>38 39</sup> | ●              | ●    | ●    | ●       |  Portable ultrasound (GE Healthcare Vivid i BT06 with 10MHz linear array probe, Little Chalfont, UK) with ECG.                                                            | Performed in supine position with head turned 45 degrees to the left. Probe applied to right side of the neck to capture carotid artery wall images, with concurrent ECG trace.                                              |
| Arterial stiffness and blood pressure <sup>40</sup>                | ●              | ●    | ●    | ●       |  SphygmoCor XCEL (AtCor Medical, West Ryde, AUS).                                                                                                                         | Aortic-femoral pulse wave velocity measured x3, supine, using a tonometer on the neck and blood pressure (BP) cuff on the thigh. Pulse wave analysis (including BP) measured x3, 1 minute apart, using a BP cuff on the arm. |
| Microvascular structure <sup>41</sup>                              | ●              | ●    |      |         |  Retinal camera (Canon CR-DGi, Tokyo, Japan), fitted with a digital SLR camera (Canon EOS 60D, Tokyo, Japan).                                                             | In a darkened room without mydriasis, two retinal photographs were taken per eye, one focused on the macula and one focused on the optic disc.                                                                               |
| <b>Respiratory measures</b>                                        |                |      |      |         |                                                                                                                                                                                                                                                            |                                                                                                                                                                                                                              |
| Lung function                                                      | ●              | ●    | ●    | ●       |  Spirometer <sup>42</sup> (Vyntus, California (Ca), USA) and Sentry Suite software (Ca, USA) for collection (v2.10) and download (v2.17).                                 | Children and parents perform 3-8 maximal exhalation manoeuvres. Children inhale 4 puffs of bronchodilator (Ventolin), wait 10 minutes, and repeat test.                                                                      |
| <b>Language</b>                                                    |                |      |      |         |                                                                                                                                                                                                                                                            |                                                                                                                                                                                                                              |
| Expressive and receptive language                                  | ●              | ●    | ●    | ●       |  Recalling Sentences subtest, Pearson Clinical Evaluation of Language Fundamentals–4th edition, Australian version, <sup>43</sup> iPad (Apple, Ca, USA) and headphones. | Participant recalls and repeats up to 32 recorded spoken sentences of varying length and syntactic complexity.                                                                                                               |
| Receptive vocabulary                                               | ●              | ●    | ●    | ●       |  National Institutes of Health Picture Vocabulary test <sup>44</sup> (NIH Toolbox software with Cognition package), iPad & headphones.                                  | Participant hears word and selects picture best representing the words meaning. Adaptive test using computer-based algorithms to quickly approximate and then precisely pinpoint participant ability.                        |

| Construct & Measure                                         | Main Mini Home |      |      | Station | Equipment/instrument*                                                                                                                                                                                                                          | Data/sample collection protocol in brief                                                                                                                                                                                |                                                                                                                                                             |
|-------------------------------------------------------------|----------------|------|------|---------|------------------------------------------------------------------------------------------------------------------------------------------------------------------------------------------------------------------------------------------------|-------------------------------------------------------------------------------------------------------------------------------------------------------------------------------------------------------------------------|-------------------------------------------------------------------------------------------------------------------------------------------------------------|
|                                                             | Ch P           | Ch P | Ch P |         |                                                                                                                                                                                                                                                |                                                                                                                                                                                                                         |                                                                                                                                                             |
| <b>Hearing</b>                                              |                |      |      |         |                                                                                                                                                                                                                                                |                                                                                                                                                                                                                         |                                                                                                                                                             |
| Hearing threshold <sup>45 46</sup>                          | ●              | ●    | ●    | ●       |  Audiometer (Oscilla USB-330, version 3.3.4, Taastrup, Denmark) and Oscilla headphones. Data exported using version 4.0.0.                                    | In a soundproof booth with headphones, participant presses button on hearing sound. Adaptive test: sound presented at increasing and decreasing volume at 4 frequencies (1, 2, 4, 8 kHz). Each ear tested separately.   |                                                                                                                                                             |
| Middle ear function <sup>47</sup>                           | ●              | ●    | ●    | ●       |  Tympanometer (Oscilla TSM300, Taastrup, Denmark) and AudioConsole software (Version 3.3.4).                                                                  | Tympanometer in ear canal varies air pressure, vibrating the tympanic membrane to measure canal volume, middle ear pressure & compliance.                                                                               |                                                                                                                                                             |
| Speech reception threshold                                  | ●              | ●    | ●    | ●       |  Listening in Spatialised Noise – Sentences Test v1.104, <sup>48 49</sup> Phonak, NSW, Australia), laptop & headphones (Sennheiser HD215, Wedemark, Germany). | In a soundproof booth with headphones, participant repeats sentences at varying volume against fixed-volume background conversation. Adaptive test; computer algorithms pinpoints threshold.                            |                                                                                                                                                             |
| <b>Diet and food choices</b>                                |                |      |      |         |                                                                                                                                                                                                                                                |                                                                                                                                                                                                                         |                                                                                                                                                             |
| Food choices                                                | ●              | ●    |      |         |  Digital weight scales accurate to 1 gram (Acculab SVI-10A, Goettingen, Germany).                                                                             | Participant provided with a food box with prepacked snack food items to eat during a 15-minute break. Boxes on different days randomised to differ by box size and food amount. Uneaten food weighed at end of session. |                                                                                                                                                             |
| <b>Physical activity and time use</b>                       |                |      |      |         |                                                                                                                                                                                                                                                |                                                                                                                                                                                                                         |                                                                                                                                                             |
| Physical activity, sedentary behaviour, sleep <sup>50</sup> | ●              | ●    | ●    | ●       | ●                                                                                                                                                                                                                                              |  Wrist-worn accelerometer (GENEActiv Original, Cambs, UK) and self-report activity log.                                              | Tri-axial accelerometer on non-dominant wrist for 8 days. Participant records type of day (school, non-school), sleep times and activities with device off. |
| Time Use                                                    | ●              | ●    | ●    |         |                                                                                                                                                                                                                                                |  Multimedia Activity Recall for Children and Adults <sup>51-53</sup> program.                                                        | Activities recalled from the previous 24-48 hours, in increments of >=5 minutes. 2-3 days recalled, including one school and one non-school day.            |

| Construct & Measure                           | Main Mini Home |      |      | Station                                                                             | Equipment/instrument*                                                                                                                              | Data/sample collection protocol in brief                                                                                                                                                                                                                                                      |
|-----------------------------------------------|----------------|------|------|-------------------------------------------------------------------------------------|----------------------------------------------------------------------------------------------------------------------------------------------------|-----------------------------------------------------------------------------------------------------------------------------------------------------------------------------------------------------------------------------------------------------------------------------------------------|
|                                               | Ch P           | Ch P | Ch P |                                                                                     |                                                                                                                                                    |                                                                                                                                                                                                                                                                                               |
| <b>Strength and fitness</b>                   |                |      |      |                                                                                     |                                                                                                                                                    |                                                                                                                                                                                                                                                                                               |
| Eurofit broad jump <sup>54</sup>              | •              | •    | •    |    | Gym mat and measuring tape (Lufkin L610CME, Maryland, USA).                                                                                        | Participant jumps horizontally from a standing start with double-leg take off. Longest of 3 jumps (measured in cm) after practice jump recorded.                                                                                                                                              |
| PWC170 VO <sub>2</sub> max test <sup>55</sup> | •              |      |      |    | Exercise bike (Monark 928G3, Manila, Philippines) and chest-worn heart rate monitor (Polar FT4, Smeaton Grange, Australia).                        | Warm up, then cycle at 60 RPM for 3x 2-min bouts. Resistance increases as per heart rate at end of each bout. Aerobic work capacity (VO <sub>2</sub> max) estimated.                                                                                                                          |
| <b>Vision</b>                                 |                |      |      |                                                                                     |                                                                                                                                                    |                                                                                                                                                                                                                                                                                               |
| Visual acuity                                 | •              | •    | •    |    | Computerised adaptive Freiburg Visual Acuity and Contrast Test <sup>56</sup> with Landolt C optotypes (FrACT 3.8.2, Breisgau, Germany).            | Participant identifies optotypes (shapes) from 3 meters. Right and left eyes tested separately, without glasses or contact lenses. Adaptive test; computer algorithms adjust size of optotypes presented to determine visual acuity. If visual acuity < 1.0, test repeated with pinhole lens. |
| <b>2D and 3D oral photography</b>             |                |      |      |                                                                                     |                                                                                                                                                    |                                                                                                                                                                                                                                                                                               |
| 2D and 3D oral photography                    | •              | •    | •    |   | <i>2D photography</i> - Digital SLR camera (Canon 70D, Tokyo, Japan).<br><i>3D photography</i> – 3-pod 3D camera (3dMD Trio system, Georgia, USA). | 2D photos of the dorsum of extruded tongue; then with lip retractors in place, teeth in occlusion and slightly apart with lower incisal edges visible. 3D photo teeth in occlusion with lip retractors in place.                                                                              |
| 3D facial photography                         | •              | •    |      |  | 3-pod 3D camera (3dMD Trio system, Georgia, USA).                                                                                                  | 3D photo of the face (neutral expression, hair pulled back in net to show hairline), ears and under chin.                                                                                                                                                                                     |
| <b>Written story</b>                          |                |      |      |                                                                                     |                                                                                                                                                    |                                                                                                                                                                                                                                                                                               |
| Handwriting, written language                 | •              | •    | •    |  | Pen, paper. Using protocol adapted from 1958 National Child Development Study (UK). <sup>57</sup>                                                  | Child writes a short story about what they think their life will be like when they are 25 years old.                                                                                                                                                                                          |

| Construct & Measure                  | Main Mini Home |      |      | Station                                                                                                                                                                | Equipment/instrument*                                                                                                                                                                              | Data/sample collection protocol in brief                                                                                                                 |
|--------------------------------------|----------------|------|------|------------------------------------------------------------------------------------------------------------------------------------------------------------------------|----------------------------------------------------------------------------------------------------------------------------------------------------------------------------------------------------|----------------------------------------------------------------------------------------------------------------------------------------------------------|
|                                      | Ch P           | Ch P | Ch P |                                                                                                                                                                        |                                                                                                                                                                                                    |                                                                                                                                                          |
| <b>Wellbeing and quality of life</b> |                |      |      |                                                                                                                                                                        |                                                                                                                                                                                                    |                                                                                                                                                          |
| General wellbeing                    | ●              | ●    | ●    |                                                                                       | International Survey of Children's Wellbeing. <sup>58 59</sup>                                                                                                                                     | 6-item measure of subjective wellbeing.                                                                                                                  |
|                                      |                |      |      |                                                                                                                                                                        | Pediatric Quality of Life (PedsQL) 4.0 General Wellbeing Scale. <sup>60</sup>                                                                                                                      | 7-item measure of quality of life and general wellbeing.                                                                                                 |
| Health related quality of life       | ●              | ●    | ●    |                                                                                       | PedsQL 4.0 Generic Core Scale. <sup>60</sup>                                                                                                                                                       | 23-item measure of physical and psychosocial health, yielding total, physical and psychosocial summary scores.                                           |
| Health related quality of life       |                | ●    | ●    |                                                                                       | Assessment of quality of life 8D Scale. <sup>61</sup>                                                                                                                                              | 35-item measure of health-related quality of life. Overall utility score and dimension scores calculated.                                                |
| Health related quality of life       | ●              | ●    | ●    |      | Child Health Utility 9D. <sup>62</sup>                                                                                                                                                             | 9-item measure of health-related quality of life. Overall utility score calculated.                                                                      |
| <b>Pain</b>                          |                |      |      |                                                                                                                                                                        |                                                                                                                                                                                                    |                                                                                                                                                          |
| Pain                                 | ●              | ●    | ●    |      | Pain severity questions <sup>63</sup> with pain manikin adapted for on-line administration. <sup>64</sup>                                                                                          | Asked about pain >1 day in past month; if yes, when started, and (children only) which body regions.                                                     |
| <b>Diet</b>                          |                |      |      |                                                                                                                                                                        |                                                                                                                                                                                                    |                                                                                                                                                          |
| Diet                                 | ●              | ●    | ●    |   | Adapted National Secondary Students' Diet and Activity <sup>65</sup> questions, supplemented with adapted International Study of Childhood Obesity, Lifestyle and Environment <sup>66</sup> items. | 26-item brief food frequency survey of usual intake of a range of different foods including fruits and vegetables.                                       |
| <b>Allergy and eczema</b>            |                |      |      |                                                                                                                                                                        |                                                                                                                                                                                                    |                                                                                                                                                          |
| Family allergies and pet exposure    |                | ●    | ●    |                                                                                     | Allergy and pet exposure questions from the HealthNuts study; <sup>67 68</sup> parent-reported.                                                                                                    | Branched questionnaire items about child's siblings and parent's history of asthma, eczema, hay fever, latex/insect/food allergy, and the family's pets. |
| Eczema severity and treatment        | ●              | ●    | ●    |                                                                                     | Eczema questions from the International Study of Asthma and Allergies in Childhood study; <sup>69</sup> parent-reported.                                                                           | Branched questionnaire items about itchy rash, eczema, dry skin, and moisturisers and topical steroid use in the study child.                            |



| Construct & Measure                           | Main Mini Home |      |      | Station | Equipment/instrument* | Data/sample collection protocol in brief                                                                                                                                                                                                                                                  |                                                                                                                                                                                                                                                                                                                                                                                                        |
|-----------------------------------------------|----------------|------|------|---------|-----------------------|-------------------------------------------------------------------------------------------------------------------------------------------------------------------------------------------------------------------------------------------------------------------------------------------|--------------------------------------------------------------------------------------------------------------------------------------------------------------------------------------------------------------------------------------------------------------------------------------------------------------------------------------------------------------------------------------------------------|
|                                               | Ch P           | Ch P | Ch P |         |                       |                                                                                                                                                                                                                                                                                           |                                                                                                                                                                                                                                                                                                                                                                                                        |
| <b>Colouring</b>                              |                |      |      |         |                       |                                                                                                                                                                                                                                                                                           |                                                                                                                                                                                                                                                                                                                                                                                                        |
| Natural skin, hair and eye colouring          | ●              | ●    | ●    | ●       | ●                     |  Questions adapted to self-report format from Paediatric Autoimmune Disease study <sup>70</sup> colour chart; parent-reported.                                                                           | 3-item measure of the natural skin, hair and eye colour of both the child and parent.                                                                                                                                                                                                                                                                                                                  |
| <b>Medications and supplements</b>            |                |      |      |         |                       |                                                                                                                                                                                                                                                                                           |                                                                                                                                                                                                                                                                                                                                                                                                        |
| Current medications and supplements           | ●              | ●    | ●    |         |                       |  Medications and supplements questions modified from LSAC; <sup>71</sup> parent-reported.                                                                                                                | Branched questionnaire items about the child's medication and supplement use.                                                                                                                                                                                                                                                                                                                          |
| <b>Health, welfare and community services</b> |                |      |      |         |                       |                                                                                                                                                                                                                                                                                           |                                                                                                                                                                                                                                                                                                                                                                                                        |
| Hospital admissions and health insurance      | ●              | ●    | ●    |         |                       |  Child lifetime hospitalisations, health care card and insurance coverage questions modified from LSAC; <sup>71</sup> parent-reported.                                                                   | Branched questionnaire items about child's lifetime hospital admissions (including age, diagnosis), and concession card/private health insurance coverage.                                                                                                                                                                                                                                             |
| Health service use                            | ●              | ●    | ●    |         |                       |  Use of services questions modified from LSAC; <sup>71</sup> parent-reported.                                                                                                                            | Branched questionnaire items about child's health service use and parent time spent on service use.                                                                                                                                                                                                                                                                                                    |
| Community participation                       | ●              | ●    | ●    |         |                       |  Community activity use questions modified from LSAC; <sup>71</sup> parent-reported.                                                                                                                     | Branched questionnaire on community activity participation (eg team sports, music) in last year.                                                                                                                                                                                                                                                                                                       |
| <b>Biological samples</b>                     |                |      |      |         |                       |                                                                                                                                                                                                                                                                                           |                                                                                                                                                                                                                                                                                                                                                                                                        |
| Venous blood                                  | ●              | ●    | ●    | ●       |                       |  S-Monovette vacutainers: 2.7ml K3 EDTA (05.1167.001), 9ml K3 EDTA (02.1066.001), 7.5ml Lithium Heparin liquid (01.1608.001), 9ml Serum Gel with Clotting Activator (02.1388.001), Sarstedt, Australia | Approximately 28mL blood from non-dominant arm of semi-reclining (45°), semi-fasted participants, processed into 0.5mL aliquots. Up to 6 EDTA plasma, 6 EDTA buffy coat, 6 LiH plasma, 6 LiH buffy coat (viable cells) and 6 serum per participant. In addition, <i>either</i> a whole blood clot <i>or</i> 3 whole blood aliquots and a dried blood spot (see next row). All stored at -80°C on site. |

| Construct & Measure | Main Mini Home |      |      | Station | Equipment/instrument* | Data/sample collection protocol in brief                                                                                                                                                                                      |                                                                                                                                                                                                                                                   |
|---------------------|----------------|------|------|---------|-----------------------|-------------------------------------------------------------------------------------------------------------------------------------------------------------------------------------------------------------------------------|---------------------------------------------------------------------------------------------------------------------------------------------------------------------------------------------------------------------------------------------------|
|                     | Ch P           | Ch P | Ch P |         |                       |                                                                                                                                                                                                                               |                                                                                                                                                                                                                                                   |
| Dried blood spot    | ●              | ●    | ●    | ●       | ●                     |  Lancet (1.6mm (#85.1018) or 1.8mm (#85.1016) depth, Sarstedt Australia), Guthrie card.                                                      | Card used for newborn screening is blotted with four drops of blood, collected via either a finger prick or pipetting a small amount of the venous whole blood sample. Stored at room temperature.                                                |
| Urine               | ●              | ●    | ●    | ●       | ●                     |  70mL screw cap polypropylene sterile pot (#75.9922.731, Sarstedt, Australia)                                                                | Participant collects random urine sample into 30mL sterile urine pot, pipetted into 12x 0.7mL aliquots. Stored at -80°C on site.                                                                                                                  |
| Saliva              | ●              | ●    | ●    | ●       | ●                     |  50mL polypropylene sterile tube (#FAL352070, Falcon, Corning Inc., Corning, NY, USA)                                                        | Five minute passive saliva drool into sterile tube. Sample weighed, then pipetted into 6x 0.5mL aliquots. Stored at -80°C on site.                                                                                                                |
| Buccal swab         |                | ○    | ○    | ○       | ○                     |  Buccal swab (Oracollect DNA OCR-100, The Hague, Netherlands. If not available, FloqSwab COPAN Flock Technologies, Brescia, Italy was used). | Participant rubs swab over gums/inner cheeks. <i>OCR-100</i> : Immerses swab in the preserving liquid, seals tube. Aliquoted into 2 x 0.5mL aliquots. <i>FloqSwab</i> : Seals swab in air-tight container. Stored at room temperature then -80°C. |
| Hair                | ●              | ●    | ●    | ●       | ●                     |  String, aluminium foil, envelope, scissors.                                                                                                 | Two locks of hair (4mm in diameter) cut close to the scalp from the occipital area under the crown. Hair wrapped in aluminium foil (scalp end identified) and stored in a barcoded envelope at room temperature.                                  |
| Toenails            | ●              | ●    | ●    | ●       | ●                     |  Scissors, envelope.                                                                                                                       | Clean toenails >3mm trimmed from right big toe (if not available, left big toenail or fingernails) and stored at room temperature in barcoded envelope.                                                                                           |

Questionnaire measures are self-reported, unless indicated they were parent-reported. \*All questionnaire items administered by iPad or laptop, except the pain manikin, which was completed on paper at home visits. For brevity, iPad or laptop is not listed for every questionnaire item. Open circles indicate sample collected from non-attending parent.

Ch: Data/sample collected relates to child participant; P: Data/sample collected relates to parent participant; BP: Blood pressure; Ca: California, USA; FrACT: Freiburg Visual Acuity and Contrast Test; kHz: kilohertz; LiH: Lithium Heparin; LSAC: Longitudinal Study of Australian Children; PedsQL: Pediatric Quality of Life; NaSSDA: National Secondary Students' Diet and Activity; NIH: National Institutes of Health; UK: United Kingdom; USA: United States of America; VO<sub>2</sub>max: Maximum volume of oxygen consumed; 2D: Two dimensional; 3D: Three dimensional.

1  
2  
3 *Assessment sequence:* Participants completed the assessments in a standard sequence (Figure  
4 2), designed to minimise interdependencies between measures. Bronchodilator administration  
5 (which may alter cardiovascular parameters) followed cardiovascular measures, and the  
6 snack station was scheduled after saliva and semi-fasting blood collection, but before  
7 exercise.  
8  
9

10  
11 The visit started with the parent providing consent, while the child wrote their story at *Life at*  
12 25. At assessment centres, participants were then given a carry bag containing an iPad to  
13 complete the questionnaire, water bottle and urine sample collection kit, and a lanyard  
14 showing the order of data collection stations to visit. Participants advanced every 15 minutes  
15 from one station to the next (except child *Lung Fun* which was 30 minutes duration),  
16 following the previous participant in their journey around the Centre. Most stations were  
17 conducted one-on-one, but in some the study child and attending parent were both present  
18 (*CheckPoint Check-in, Measure Up, Tooth Booth, Bone Zone, child Young Bloods* and  
19 *Endgames*, see figure 2), and two children could be present at any one time for *Life at 25,*  
20 *Jumping Beans* and *Bike Hike*.  
21  
22  
23  
24  
25  
26  
27

28 Prior to the last station *Endgames*, participants could take extra time to complete their  
29 questionnaire or provide a urine sample. At *Endgames*, a staff member explained the contents  
30 of a take-home pack. The child and parent were fitted with their wrist-worn accelerometers,  
31 and a follow-up phone interview was booked/confirmed for the child to complete additional  
32 time use diaries.<sup>51</sup> The take-home pack also included a reply-paid express post satchel, child  
33 and parent activity log cards, non-attending parent buccal sample collection kit (as  
34 applicable), summary of health results collected on the day, and thank you gifts and token  
35 reimbursement for travel.  
36  
37  
38  
39  
40

41 Home visit consent, assessments and take-home packs used the same protocol as the  
42 assessment centres and included at least one measure from every major health domain;  
43 however, some assessments were omitted (table 1). The home visit sequence generally  
44 mirrored the centre flow, with minor adjustments to allow one staff member to assess both  
45 child and parent within the available time. Dried blood spot, urine and buccal swabs were  
46 obtained, and urine processing was delayed when local laboratory facilities were not  
47 available.<sup>72</sup>  
48  
49  
50  
51  
52

53 Assessments were undertaken by research assistants and students, after training by experts  
54 and under real-time quality checks. Inter- and intra-rater reliability for data transcription and  
55  
56  
57  
58  
59

1  
2  
3 scoring was calculated, where relevant and possible. Data collection reliability was not  
4 available as the participant flow precluded repeated measures of same individual.  
5

6 **Measures:** Measures and biological samples collected are briefly described in Table 1; other  
7 papers of this BMJ Open Special Issue<sup>11-24</sup> provide greater detail, epidemiological description  
8 and parent-concordance for many of these, and their rationale has been previously  
9 published.<sup>73</sup> Data were collected electronically via specialist medical equipment/software or,  
10 where not possible, staff entered data into REDCap (Research Electronic Data Collection  
11 tool).<sup>74</sup> REDCap was also used to administer the child and parent questionnaires on iPads.  
12 Data collection and data processing Standing Operating Procedures are available (see  
13 <http://www.lsac-childhealthcheckpoint.org.au>). Most measures were offered to both children  
14 and parents; however, the parent flow omitted the exercise stations (*Bike Hike* and *Jumping*  
15 *Beans*), time use diary, post-bronchodilator spirometry and toenail samples, and instead  
16 included a more detailed questionnaire.  
17

18 *Biospecimen collection and repository:* Biospecimens collected are described in table 1.  
19 Samples (except buccal swabs) were processed within hours in an on-site laboratory set up at  
20 all Main Assessment and most Mini Assessment Centres. Samples for an entire assessment  
21 centre were stored appropriately prior to shipping as a single batch to the Melbourne  
22 Children's Bioresource Centre (MCRI) where they are stored in a de-identified manner until  
23 depletion. As of October 2017, completed biomarker analyses for all parents and children  
24 with relevant samples were serum metabolomics (<http://www.nightingalehealth.com>),<sup>21 75 76</sup>  
25 urinary albumin-creatinine ratio (ACR)<sup>18</sup> and telomere length;<sup>15</sup> genotyping analyses were  
26 under way; and funding had been secured for micronutrient and one-carbon pathway  
27 analyses.  
28

29 **Data access:** The LSAC data are available to researchers under licence, and from early 2018  
30 will include the first tranche of completed parent and child CheckPoint data (see table 3 for  
31 measures in the first CheckPoint data release). The LSAC website explains access to these  
32 data (<http://www.growingupinaustralia.gov.au/data/dataaccessmenu.html>).  
33

34 It is intended that all further CheckPoint data and biospecimens will also be accessible to all  
35 researchers. Applications to undertake new data extraction and biosamples, or to collaborate  
36 with CheckPoint investigators on in-train funded new data, are considered by CheckPoint's  
37 Data/Biospecimens Access Committees (see <http://www.lsac-childhealthcheckpoint.org.au>).  
38  
39  
40  
41  
42  
43  
44  
45  
46  
47  
48  
49  
50  
51  
52  
53  
54  
55  
56  
57  
58  
59  
60

1  
2  
3 **Statistical analyses:** Sample characteristics, sample size and consent rates were described as  
4 counts, proportions, means and standard deviations. Baseline demographic characteristics of  
5 LSAC families who did and did not participate in CheckPoint were compared to consider the  
6 representativeness of the maintained CheckPoint sample in relation to preceding LSAC  
7 waves.  
8  
9

10  
11 **Survey weights:** CheckPoint survey weights were created<sup>77</sup> using similar methods to those  
12 used for previous waves of LSAC, and are provided in the CheckPoint dataset. These  
13 methods account for the selection probability of each child to establish the target design  
14 sample, initial non-response to the baseline survey and subsequent loss to follow-up. LSAC  
15 and CheckPoint survey weights have been estimated to reflect the likelihood of participation  
16 from wave to wave within the limits of the information available from study measures.  
17  
18

19  
20 Applying LSAC survey weights produces analyses that will be as representative as possible  
21 for all Australian children born in 2004 and their parents. CheckPoint differs in that, for the  
22 majority of measures, only the attending parent (usually the mother) was assessed, and thus  
23 weighted analyses of the parent data are more difficult to interpret because the weighting  
24 does not estimate a representative sample of all parents.  
25  
26  
27  
28  
29  
30

## 31 32 **RESULTS**

33  
34 In 2014, ahead of the main data collection wave, the vanguard families reported high levels  
35 of enjoying the CheckPoint visit (mean out of 10: child 8.8, parent 8.2), recommending it to  
36 others (child 7.7, parent 9.0) and valuing the child health report provided on the day (child  
37 7.7, parent 8.2). On average, participants liked being in the LSAC study much more after  
38 their CheckPoint experience (mean: child 8.4, parents 7.7).  
39  
40  
41

42  
43 The CheckPoint sample size was fixed by LSAC retention to wave 6. Of a total of 3764  
44 families who participated in wave 6, 3513 (93%) consented to CheckPoint contact, 3152  
45 (84%) provided valid contact details and were invited into CheckPoint, and 1875 (50%)  
46 participated (figure 1). One family withdrew consent after assessment. Thus, the CheckPoint  
47 analytic sample included 1874 parent-child pairs, plus 1051 non-attending resident parents.  
48  
49

50  
51 Most non-participation (60%) was due to inability to attend or reschedule a visit during the  
52 short period CheckPoint was in each location. Far fewer families declined (18%). Most  
53 families (72%) attended a Main Assessment Centre, 8% attended a Mini Assessment Centre  
54 and 20% completed a home visit.  
55  
56  
57  
58  
59

1  
2  
3 Demographic characteristics of the CheckPoint sample and non-responders are summarised  
4 in table 2. Within the CheckPoint sample, 99% of attending parents and all non-attending  
5 participants were a biological parent of the study child. There was an equal distribution of  
6 boys and girls. However, the sample of attending parents was not equally or randomly  
7 comprised of mothers and fathers, since each family decided which parent or guardian  
8 attended and most (88%) attending parents were mothers. Almost 90% of attending parents  
9 were nominated 'Parent 1' (ie the parent who knows the child best and completes the main  
10 questionnaire) in previous LSAC waves. The majority of families lived in major cities, with a  
11 similar distribution across the states and territories to the Australian population. Larger  
12 proportions of families were in the higher socio-economic position quintiles than in the  
13 Australian population.

14  
15  
16  
17  
18  
19  
20  
21 Compared to B cohort families who did not take part in the CheckPoint, table 2 shows that  
22 participating families at baseline (2004) reported higher socioeconomic position and parental  
23 education, and lower likelihood of non-English speaking or Indigenous backgrounds.  
24  
25  
26  
27  
28  
29  
30  
31  
32  
33  
34  
35  
36  
37  
38  
39  
40  
41  
42  
43  
44  
45  
46  
47  
48  
49  
50  
51  
52  
53  
54  
55  
56  
57  
58  
59  
60

**Table 2. Child Health CheckPoint sample characteristics**

| Characteristic                                                                           | Sample characteristics<br>at CheckPoint (2015-<br>16)* n=1874 families | Baseline characteristics (2004) <sup>†</sup> |                                      |
|------------------------------------------------------------------------------------------|------------------------------------------------------------------------|----------------------------------------------|--------------------------------------|
|                                                                                          |                                                                        | In CheckPoint<br>n=1874 families             | Not in CheckPoint<br>n=3233 families |
| Values are %, unless indicated                                                           |                                                                        |                                              |                                      |
| Child age in years, mean (SD)                                                            | 12.4 (0.4)                                                             | 0.8 (0.2)                                    | 0.8 (0.2)                            |
| Parent age in years, mean (SD)                                                           | 44.4 (5.2)                                                             | 32.1 (4.9)                                   | 30.4 (5.7)                           |
| Female child                                                                             | 49.0                                                                   | 49.0                                         | 48.9                                 |
| Female parent                                                                            | 87.7                                                                   | 98.7                                         | 98.5                                 |
| Child accompanied by biological parent                                                   | 98.9                                                                   | 99.7                                         | 99.7                                 |
| Child has Indigenous background <sup>§</sup>                                             | 2.0                                                                    | 2.0                                          | 6.0                                  |
| Parent born in Australia <sup>‡</sup>                                                    | 79.0                                                                   | 79.3                                         | 81.2                                 |
| Parent home language not English <sup>‡</sup>                                            | 10.8                                                                   | 11.2                                         | 16.3                                 |
| Area of residence <sup>1</sup>                                                           |                                                                        |                                              |                                      |
| Major city                                                                               | 70.3                                                                   | 70.5                                         | 64.0                                 |
| Inner regional                                                                           | 20.3                                                                   | 18.0                                         | 20.6                                 |
| Outer regional                                                                           | 8.7                                                                    | 9.9                                          | 12.8                                 |
| Remote                                                                                   | 0.8                                                                    | 1.6                                          | 2.6                                  |
| Australian state/territory of residence                                                  |                                                                        |                                              |                                      |
| Australian Capital Territory                                                             | 2.8                                                                    | 2.9                                          | 1.6                                  |
| Northern Territory                                                                       | 1.6                                                                    | 2.4                                          | 1.3                                  |
| New South Wales                                                                          | 28.6                                                                   | 29.9                                         | 32.6                                 |
| Queensland                                                                               | 21.5                                                                   | 20.0                                         | 20.1                                 |
| South Australia                                                                          | 8.0                                                                    | 7.5                                          | 6.4                                  |
| Tasmania                                                                                 | 3.3                                                                    | 3.2                                          | 1.6                                  |
| Victoria                                                                                 | 22.5                                                                   | 22.2                                         | 25.8                                 |
| Western Australia                                                                        | 11.8                                                                   | 11.8                                         | 9.7                                  |
| Socioeconomic position <sup>2</sup> , mean (SD) <sup>‡</sup>                             | 0.2 (1.0)                                                              | 0.3 (1.0)                                    | -0.2 (1.0)                           |
| Neighbourhood Disadvantage Index <sup>3</sup> ,<br>mean (SD) and % in national quintiles | 1023 (60)                                                              | 1019 (61)                                    | 1003 (59)                            |
| 1 (least disadvantaged quintile)                                                         | 34.8                                                                   | 29.0                                         | 18.9                                 |
| 2                                                                                        | 23.4                                                                   | 20.3                                         | 19.8                                 |
| 3                                                                                        | 18.8                                                                   | 19.3                                         | 21.6                                 |
| 4                                                                                        | 14.8                                                                   | 19.8                                         | 21.7                                 |
| 5 (most disadvantaged quintile)                                                          | 8.2                                                                    | 11.6                                         | 18.1                                 |
| Parent's highest level of education <sup>‡</sup>                                         |                                                                        |                                              |                                      |
| Did not complete high school                                                             | 20.1                                                                   | 21.4                                         | 39.0                                 |
| High school                                                                              | 44.4                                                                   | 42.3                                         | 39.9                                 |
| Undergraduate degree (Bachelor)                                                          | 23.6                                                                   | 26.6                                         | 15.5                                 |
| Postgraduate degree                                                                      | 11.9                                                                   | 9.7                                          | 5.7                                  |
| Attending parent's employment status <sup>‡</sup>                                        |                                                                        |                                              |                                      |
| Working full-time (≥30<br>hours/week)                                                    | 46.9                                                                   | 31.8                                         | 22.4                                 |
| Working part-time                                                                        | 37.4                                                                   | 2.7                                          | 1.6                                  |
| Not currently working                                                                    | 15.7                                                                   | 65.5                                         | 76.0                                 |
| Parent has a spouse/partner                                                              | 88.1                                                                   | 95.7                                         | 91.3                                 |

\*Data collected in CheckPoint 2015-16 wave, except data indicated as collected at <sup>‡</sup>wave 6 (2014) or <sup>§</sup>wave 1 (2004). Parent data = CheckPoint 'attending parent'. <sup>†</sup>Data collected in wave 1 (2004). Parent data = 'Parent 1'. CheckPoint attending parent is the wave 1 Parent 1 for 89.3% of families. <sup>1</sup>Australian Bureau of Statistics (ABS) Remoteness Area Code (<sup>ref 78</sup>). <sup>2</sup>LSAC-derived Family socioeconomic position z-score (<sup>ref 79</sup>). Higher scores = greater advantage. <sup>3</sup>ABS 2011 Socio-Economic Indexes for Areas Index of Relative Socioeconomic Disadvantage (<sup>ref 80</sup>)

1 Data completeness for each measure was high (Table 3) at >92% of participants eligible for  
2 each measure, except for accelerometry and child pain. A shortage of accelerometers at  
3 certain points over the data collection period meant physical activity data was available for  
4 74% of children and 77% of parents. Initial problems with the branching architecture of  
5 questions<sup>72</sup> meant pain data was available for only 85% of children (but 99% of parents). The  
6 most common reasons for missing data was the measure not being included in all visit types,  
7 followed by equipment unavailability, participant refusal and erroneous data removed in the  
8 preparation of the dataset.<sup>72</sup>  
9  
10  
11  
12  
13  
14  
15  
16  
17  
18  
19  
20  
21  
22  
23  
24  
25  
26  
27  
28  
29  
30  
31  
32  
33  
34  
35  
36  
37  
38  
39  
40  
41  
42  
43  
44  
45  
46  
47  
48  
49  
50  
51  
52  
53  
54  
55  
56  
57  
58  
59  
60



**Table 3. Sample size by measure and participant group**

| Construct                     | Measure                                          | Children                             | Parents    |                   | Parent-child pairs |                   | 2018 data release |
|-------------------------------|--------------------------------------------------|--------------------------------------|------------|-------------------|--------------------|-------------------|-------------------|
|                               |                                                  | n=1874                               | All n=1874 | Biological n=1854 | All n=1874         | Biological n=1854 |                   |
| Anthropometry                 | Height, weight                                   | 1873                                 | 1865       | 1845              | 1864               | 1844              | ●                 |
|                               | Body composition*                                | 1859                                 | 1844       | 1824              | 1837               | 1817              | ●                 |
| Pubertal status               | Puberty Development Scale, Sexual Maturity Scale | 1807                                 | -          | -                 | -                  | -                 | ●                 |
|                               | Menstruation <sup>†</sup>                        | 844                                  | 1610       | 1598              | 740                | 733               | ●                 |
|                               | Modified Comprehensive Acne Severity Scale       | 1762                                 | -          | -                 | -                  | -                 | ●                 |
| Bone, muscle                  | Peripheral quantitative computed tomography      | 1271                                 | 1250       | 1240              | 1231               | 1222              | ●                 |
| Cardiovascular                | Carotid intima-media thickness                   | 1489                                 | 1476       | 1463              | 1462               | 1449              | ●                 |
|                               | Pulse wave velocity, pulse wave analysis         | 1836                                 | 1790       | 1773              | 1769               | 1752              | ●                 |
|                               | Blood pressure                                   | 1777                                 | 1749       | 1732              | 1682               | 1666              | ●                 |
|                               | Microvascular structure (retinal photography)    | 1307                                 | 1317       | 1307              | 1292               | 1282              | ●                 |
| Respiratory                   | Spirometry                                       | 1759                                 | 1774       | 1754              | 1688               | 1668              | ●                 |
| Language                      | Expressive & receptive language (Recall' Sent.)  | 1441                                 | 1446       | 1433              | 1415               | 1402              | ●                 |
|                               | Receptive vocabulary (NPVT)                      | 1443                                 | 1457       | 1444              | 1401               | 1389              | ●                 |
| Hearing                       | Pure tone audiometry                             | 1488                                 | 1493       | 1480              | 1480               | 1467              | ●                 |
|                               | Tympanometry                                     | 1099                                 | 1101       | 1092              | 1065               | 1056              | ●                 |
|                               | Speech reception threshold (LiSN-S)              | 1483                                 | 1482       | 1469              | 1466               | 1453              | ●                 |
| Diet and food choices         | National Secondary Students' Diet & Activity     | 1846                                 | 1862       | 1846              | 1837               | 1821              | ●                 |
|                               | Snack observation                                | 1294                                 | 1246       | 1235              | 1205               | 1195              | ●                 |
| Physical activity, time use   | Accelerometry                                    | 1382                                 | 1440       | 1424              | 1223               | 1209              | ●                 |
|                               | Time use diary (MARCA)                           | 1830                                 | -          | -                 | -                  | -                 | ●                 |
| Strength and fitness          | Eurofit broad jump                               | 1771                                 | -          | -                 | -                  | -                 | ●                 |
|                               | PWC170 VO <sub>2</sub> max test                  | 1301                                 | -          | -                 | -                  | -                 | ●                 |
| Vision                        | Freiburg Visual Acuity Test                      | 1494                                 | 1491       | 1478              | 1481               | 1468              | ●                 |
|                               | 2D and 3D photography                            | 2D and 3D photos of teeth and tongue | 1486       | 1480              | 1467               | 1478              | 1465              |
|                               | 3D photos of face                                | 1331                                 | 1316       | 1305              | 1313               | 1302              | ●                 |
| Handwriting, written language | Handwritten story about life at age 25           | 1811                                 | -          | -                 | -                  | -                 | ●                 |
| General wellbeing             | ISCW & PedsQL General Wellbeing                  | 1860                                 | -          | -                 | -                  | -                 | ●                 |

| Construct                              | Measure                                               | Children | Parents    |                   | Parent-child pairs |                   | 2018 data release |
|----------------------------------------|-------------------------------------------------------|----------|------------|-------------------|--------------------|-------------------|-------------------|
|                                        |                                                       | n=1874   | All n=1874 | Biological n=1854 | All n=1874         | Biological n=1854 |                   |
| Health related quality of life         | PedsQL, Child Health Utility 9D, AQoL-8D <sup>‡</sup> | 1854     | 1871       | 1853              | 1854               | 1836              | ●                 |
| Pain                                   | Pain <sup>§</sup>                                     | 1586     | 1859       | 1843              | 1576               | 1562              | ●                 |
| Natural colouring                      | Skin, hair and eye colour                             | 1859     | 1859       | 1843              | 1859               | 1843              | ●                 |
| Medications, supplements               | Current medications and supplements                   | 1853     | -          | -                 | -                  | -                 | ●                 |
| Health, welfare and community services | Health service use, hospital admissions               | 1874     | -          | -                 | -                  | -                 | ●                 |
|                                        | Community participation and services                  | 1822     | -          | -                 | -                  | -                 | ●                 |
| Serum metabolites                      | NMR metabolomics platform                             | 1180     | 1325       | 1313              | 1139               | 1133              | ●                 |
| Renal function                         | Urinary albumin and creatinine concentration          | 1579     | 1671       | 1653              | 1535               | 1518              | ●                 |
| Biological aging                       | Telomere length                                       | 1206     | 1343       | 1330              | 1151               | 1143              |                   |

Sample sizes pertain to those with data available. These may differ slightly from sample sizes presented in other CheckPoint papers in this BMJ Open Special Issue, where authors have restricted analyses to participants meeting specified levels of data quality or completeness. 'All parents' and 'all parent-child pairs' include biological and non-biological (eg step-, adoptive or biological relatives other than mother or father) parent-child relationships. Parent-child pairs include families where both the child *and* parent have data available for that measure. <sup>‡</sup>381 children and 344 parents have body fat % measured using a 2-limb BIA scale at home visits; the remainder have detailed body composition measured using a 4-limb BIA scale. <sup>†</sup>Girls were asked 'has menstruation started' and 'are you menstruating today?' and women were asked 'are you menstruating today?' <sup>\*</sup>Children completed the PedsQL, parents completed the AQoL-8D, and both children and parents completed the Child Health Utility 9D. <sup>§</sup>Parents completed a subset of the pain questions completed by children.

AQoL-8D: Assessment of Quality of Life 8D; BIA: Bioelectrical impedance analysis; ISCW: International Survey of Children's Wellbeing; LiSN-S: Listening in Spatialised Noise – Sentence Test; MARCA: Multimedia Activity Recall for Children and Adults; NMR: nuclear magnetic resonance; NPVT: National Institute of Health Picture Vocabulary test; PedsQL: Pediatric Quality of Life.

Biospecimen collection rates was also high (table 4) for blood (venous or finger prick, 91% of children and 96% of attending parents) and other biological samples (>70%). Most (95%) of children and parents had either a saliva (collected when laboratory facilities were available) or buccal swab (stable for 60 days before processing) sample. Consent was obtained for  $\geq 97\%$  of samples collected to share with other researchers and undertake genetic analyses, and  $\geq 94\%$  of participants to access child perinatal birth data and child neonatal blood spots, and to share child and parent digital images. Buccal samples were also collected from 1051 non-attending parents (of whom 94% consented to share, and 98% to undertake genetic analyses). In total, 1021 (55%) families have at least one sample available for the child and both biological parents.

**Table 4. Data/sample collection rates and consent for use of images/sample**

| Measure or sample       | Children n=1874       |                  |                             | Attending Parents n=1874 |                  |                             |
|-------------------------|-----------------------|------------------|-----------------------------|--------------------------|------------------|-----------------------------|
|                         | Data/sample collected | Consent to share | Consent to genetic analyses | Data/sample collected    | Consent to share | Consent to genetic analyses |
| Digital images (photos) |                       |                  |                             |                          |                  |                             |
| 2D and 3D teeth         | 1486                  | 1398             | -                           | 1480                     | 1397             | -                           |
| 3D face                 | 1331                  | 1251             | -                           | 1316                     | 1241             | -                           |
| Retinal                 | 1307                  | 1229             | -                           | 1317                     | 1240             | -                           |
| Perinatal birth data*   | 1838                  | -                | -                           | -                        | -                | -                           |
| Newborn Guthrie card*   | 1810                  | 1760             | 1775                        | -                        | -                | -                           |
| Blood                   | 1701                  | 1646             | 1673                        | 1791                     | 1730             | 1761                        |
| Plasma                  | 1230                  | 1196             | 1211                        | 1371                     | 1331             | 1353                        |
| Serum                   | 1192                  | 1160             | 1174                        | 1336                     | 1297             | 1319                        |
| Whole blood/ clot       | 1223                  | 1189             | 1204                        | 1358                     | 1318             | 1340                        |
| Guthrie card            | 1424                  | 1382             | 1405                        | 1467                     | 1420             | 1445                        |
| Urine                   | 1595                  | 1548             | 1571                        | 1685                     | 1636             | 1661                        |
| Saliva                  | 1375                  | 1327             | 1350                        | 1392                     | 1347             | 1370                        |
| Buccal                  | 398                   | 385              | 392                         | 390                      | 378              | 383                         |
| Hair                    | 1390                  | 1343             | 1365                        | 1439                     | 1397             | 1418                        |
| Toenail                 | 1586                  | 1534             | 1561                        | -                        | -                | -                           |

\*Access to these data has been consented to by participants, but not yet attempted by the study team as of October 2017.

## DISCUSSION

**Principal findings:** The Child Health CheckPoint provides a paired cross-generational snapshot of the health of 11-12 year old Australian children and their parents. Data completeness was high amongst the nearly 2000 families who participated. The utility of the data and biospecimens is further enhanced by near-universal consent for genetic analysis and sharing with other researchers. Enriching LSAC's life-long environmental data with CheckPoint's biological data strengthens the utility of LSAC to address important questions on how NCDs develop phenotypically before overt disease is evident, and shed light on the underlying dimensionality of health at different life stages.

Key logistic challenges faced by the CheckPoint were its short time window both to plan and conduct (a fixed 12 months from February 2015), the sheer size of Australia (approximately the same as continental USA), and the limited funding allowing for only one set of heavy equipment and thus curtailing the period during which the CheckPoint was available to participants in each city.

**Strengths and limitations:** Strengths of LSAC include its large population-based sample, data linkage, historical repeated measures, and open data access. Strengths of the CheckPoint module include the sophistication of its health assessments, and the cross-generational child-parent assessments paired on time of assessment, protocols and equipment. Utility of the CheckPoint data is strengthened by its timing relative to child age (i.e. adolescence onset) and LSAC duration (i.e. ten years of data already available); and its timely release of curated data to researchers (within two years of data collection), with more to come as data scoring and biomarker analyses are completed. The CheckPoint is led by diverse and specialty-based researchers, who continue to develop multi-system hypotheses and discovery research. We have prioritized harmonisation of methods with other internationally-significant cohorts (eg utilisation of the Nightingale metabolomics and Illumina Global Screening Array genotyping platforms). Finally, the CheckPoint module was enjoyable for participants, and its impact on participant retention in future LSAC waves will be examined.

The sample reflects the broader Australian population in many attributes, including state/territory of residence. A limitation (that can be partly addressed by using survey weights<sup>77</sup>) is that the majority of the parent sample are mothers, and families were more likely to live in major cities and have a higher socioeconomic status than non-participants and Australians in general. Due to sample attrition, the final number of parent-child dyads was only around

1  
2  
3 1900, limiting power for rare exposures and outcomes; this is partly offset by LSAC's  
4 common exposures, and CheckPoint's focus on continuous outcome measures. Almost all  
5 measures were collected from only one of the child's parents, although family studies will be  
6 possible for the 55% of families for whom we collected a DNA sample from both parents. A  
7 further potential limitation is that LSAC does not have prospective prenatal data on the  
8 children, although it does include prospective data from very early life (child age at wave 1  
9 spanned 3-19 months) and permission to link to birth data.  
10  
11  
12  
13

14 **Implications and future research:** The wealth and depth of longitudinal LSAC data  
15 available gives important context to CheckPoint's health and biomarker data. To commence a  
16 brand new cohort incorporating these measures is exceptionally expensive and would have  
17 set back the availability of such data by decades, at a time when other prominent efforts to do  
18 so internationally have failed.<sup>81 82</sup> Other internationally significant efforts, such as the US  
19 Environmental Influences On Child Health Outcomes (ECHO) Program,<sup>83</sup> are now taking a  
20 similar approach to CheckPoint. For example, ECHO is enriching existing traditional child  
21 cohorts with additional cutting-edge biophysical modules and forward harmonisation. This  
22 will add great value to these cohorts and to knowledge that can be generated from their  
23 interrogation.  
24  
25  
26  
27  
28  
29  
30

31 **In summary,** the efficient addition of objective health measures and biospecimens into the  
32 open-access LSAC repository greatly increases the utility of this widely-used dataset.  
33 Analysis of the CheckPoint data holds great promise in integrating cutting-edge measures of  
34 mid-childhood physiology with lifetime trajectories of mental and physical health, growth,  
35 behaviour and healthcare within a single population study. The data's utility will continue to  
36 grow as ongoing waves of the main LSAC study accrue into adulthood, when CheckPoint  
37 health data will be able to be examined both as outcomes of early life exposures (LSAC  
38 waves 1-6) and predictors of later life health (LSAC waves 7 onward).  
39  
40  
41  
42  
43  
44  
45  
46  
47  
48  
49  
50  
51  
52  
53  
54  
55  
56  
57  
58  
59  
60

1  
2  
3 **ACKNOWLEDGEMENTS:** This paper uses unit record data from *Growing Up in*  
4 *Australia*, the Longitudinal Study of Australian Children. The study is conducted in  
5 partnership between the Department of Social Services (DSS), the Australian Institute of  
6 Family Studies (AIFS) and the Australian Bureau of Statistics (ABS). The findings and views  
7 reported in this paper are those of the authors and should not be attributed to DSS, AIFS or  
8 the ABS.  
9  
10  
11

12  
13 REDCap (Research Electronic Data Capture) electronic data capture tools were used in this  
14 study. More information about this software can be found at: [www.project-redcap.org](http://www.project-redcap.org).  
15

16  
17 We thank the LSAC and CheckPoint study participants, staff and students for their  
18 contributions. In particular, we thank the CheckPoint team members Richard Liu, John  
19 Nguyen, Elissa Phillips, Anna Czajko and Josh Muller who made important contributions to  
20 the study.  
21  
22  
23  
24  
25

26 **COMPETING INTERESTS:** All authors have completed the ICMJE uniform disclosure  
27 form at [www.icmje.org/coi\\_disclosure.pdf](http://www.icmje.org/coi_disclosure.pdf) and declare financial support for the submitted  
28 work from the National Health and Medical Research Council of Australia, The Royal  
29 Children's Hospital Foundation, the Murdoch Children's Research Institute, The University  
30 of Melbourne, the National Heart Foundation of Australia, Financial Markets Foundation for  
31 Children and the Victoria Deaf Education Institute. Personal fees were received by MW, PA,  
32 MS and SZ from the Australian Department of Social Services. MW, DPB, FKM, KLy and  
33 LG are supported by the NHMRC; DPB and KLy by the National Heart Foundation of  
34 Australia; and MW by Cure Kids New Zealand. MW received grants from NZ Ministry of  
35 Business, Innovation & Employment and A Better Start/Cure Kids New Zealand, and support  
36 from Sandoz to present at a symposium outside the submitted work.  
37  
38  
39  
40  
41  
42  
43  
44  
45

46 **FUNDING:** This work was supported by the National Health and Medical Research Council  
47 (NHMRC) of Australia (Project Grants 1041352, 1109355), The Royal Children's Hospital  
48 Foundation (2014-241), the Murdoch Children's Research Institute, The University of  
49 Melbourne, the National Heart Foundation of Australia (100660), Financial Markets  
50 Foundation for Children (2014-055, 2016-310) and the Victoria Deaf Education Institute. The  
51 urinary albumin and creatinine quantification was funded through NHMRC Program Grant  
52 633003 Screening and Test Evaluation Program.  
53  
54  
55  
56  
57  
58  
59  
60

1  
2  
3 The following authors were supported by the NHMRC: Senior Research Fellowships to MW  
4 (1046518) and DPB (1064629); Career Development Fellowship to FKM (1111160); Early  
5 Career Fellowship to KLy (1091124) and LG (1035100). The following authors were  
6 supported by the National Heart Foundation of Australia: Honorary Future Leader Fellowship  
7 to DPB (100369); Postdoctoral Fellowship to KLy (101239). MW is supported by Cure Kids  
8 New Zealand.  
9  
10  
11

12  
13 The MCRI administered the research grants for the study and provided infrastructural support  
14 (IT and biospecimen management) to its staff and the study, but played no role in the conduct  
15 or analysis of the trial. DSS played a role in study design; however, no other funding bodies  
16 had a role in the study design and conduct; data collection, management, analysis, and  
17 interpretation; preparation, review, or approval of the manuscript; and decision to submit the  
18 manuscript for publication.  
19  
20  
21  
22  
23  
24

25 **CONTRIBUTIONS:** SAC is the study project manager, and planned and conducted the  
26 analyses, and drafted the initial manuscript. PA, LAB, DPB, JBC, MC, TD, BE, LG, JAK,  
27 FKM, TSO, SR, HR, RS, MS, PJS, LS, TYW and SRZ are study investigators involved in the  
28 conception and oversight of the Child Health CheckPoint, and provided expert advice and  
29 critical review of this manuscript. SD, SE, ANG, ACG, KLy and KLa are study staff or  
30 postdoctoral fellows and provided critical review of this manuscript. MW is the Principal  
31 Investigator of the Child Health CheckPoint, planned the analyses and provided critical  
32 review of this manuscript.  
33  
34  
35  
36  
37  
38  
39  
40

41 **DATA SHARING STATEMENT:** Dataset and technical documents available from  
42 *Growing Up in Australia: The Longitudinal Study of Australian Children* via low-cost license  
43 for bone fide researchers. More information is available at [www.growingupinaustralia.gov.au](http://www.growingupinaustralia.gov.au)  
44  
45  
46  
47

#### 48 **FIGURE CAPTIONS AND FOOTNOTES:**

##### 49 **Figure 1. Participant flow chart**

50  
51 N = number of families. LSAC: Longitudinal Study of Australian Children.  
52  
53  
54  
55

##### 56 **Figure 2. Assessment sequence, by participant and visit type**

Oblong box indicates child and parent attended the station together. Parents attended the *Young Bloods* stations twice; first for their own blood collection, then to accompany their child. *Food Stop* included consumption experiment at the Main Assessment Centre (ie data collected), but was simply offering refreshments at the Mini Assessment Centre (ie no data collected). The NIH Vocabulary Picture Test was administered in *Bone Zone* at the Main Assessment Centre, and as part of *Sit and Click* in Mini Assessment Centre and home visits. In home visits, *Sit and Click* (child questionnaire) had allocated time between other assessments; for the assessment centre visits, *Sit and Click* didn't have an allocated time or physical location (children completed the questionnaire in downtime at other stations). Post-visit activities (ie accelerometry, child follow-up phone interview and non-attending parent buccal swab) are not included in the diagram and followed the same protocol regardless of visit type.

## SUPPLEMENTARY DOCUMENTS

### Supplementary figure 1. Assessment centre and home visit locations

Values are number of families assessed. Main Assessment Centre locations are labelled in uppercase letters and blue colour. Mini Assessment Centre locations are labelled in sentence case letters and black colour. Home visits occurred in many locations, so the total number of home visits in each state or territory is provided inside the house symbol. No home visits occurred in the Australian Capital Territory.

## REFERENCES

1. Shonkoff JP. Building a new biodevelopmental framework to guide the future of early childhood policy. *Child Dev* 2010;81(1):357-67.
2. Khoury MJ, Lam TK, Ioannidis JP, et al. Transforming epidemiology for 21st century medicine and public health. *Cancer Epidemiol Biomarkers Prev* 2013;22(4):508-16.
3. Lauer MS, Gordon D, Wei G, et al. Efficient design of clinical trials and epidemiological research: Is it possible? *Nat Rev Cardiol* 2017;14(8):493-501.
4. Connelly R, Platt L. Cohort profile: UK Millennium Cohort Study (MCS). *Int J Epidemiol* 2014;43(6):1719-25.
5. Greene S, Williams J, Layte R, et al. Growing Up in Ireland Background and Conceptual Framework. Dublin, Ireland: Office of the Minister for Children and Youth Affairs, Department of Health and Children 2010.
6. Morton SM, Atatoa Carr PE, Grant CC, et al. Cohort profile: Growing Up in New Zealand. *Int J Epidemiol* 2013;42(1):65-75.
7. Soh SE, Tint MT, Gluckman PD, et al. Cohort profile: Growing Up in Singapore Towards healthy Outcomes (GUSTO) birth cohort study. *Int J Epidemiol* 2014;43(5):1401-9.
8. Sanson A, Johnstone R, The LSAC Research Consortium & FaCS LSAC Project Team. Growing Up in Australia takes its first steps. *Family Matters* 2004;67:46-53.
9. Wake M. Tracking the health of the next generation: Sax Institute; 2016 [Available from: <https://www.saxinstitute.org.au/news/tracking-the-health-of-the-next-generation/>].
10. Soloff C, Lawrence D, Johnstone R. LSAC technical paper number 1: Sample design. Melbourne: Australian Institute of Family Studies, 2005.
11. Welsh L, Kathriachchige G, Raheem T, et al. Spirometry: Population epidemiology and concordance in 11-12 year old Australians and their parents. Submitted to BMJ Open October 2017.



12. Vlok J, Simm PJ, Clifford SA, et al. Bone health (pQCT): Population epidemiology and concordance in 11-12 year old Australians and their parents. Submitted to BMJ Open October 2017.
13. Vivarini P, Kerr JA, Grobler A, et al. Food choices: Population epidemiology and concordance in 11-12 year old Australians and their parents. Submitted to BMJ Open October 2017.
14. Smith J, Wang J, Grobler A, et al. Hearing, speech reception, vocabulary and language: Population epidemiology and concordance in 11-12 year old Australians and their parents. Submitted to BMJ Open October 2017.
15. Nguyen MT, Lycett K, Vryer R, et al. Telomere length: Population epidemiology and concordance in 11-12 year old Australians and their parents. Submitted to BMJ Open October 2017.
16. Matricciani L, Fraysse F, Grobler A, et al. Sleep and Time Use: Population epidemiology and concordance in 11-12 year old Australians and their parents. Submitted to BMJ Open October 2017.
17. Liu RS, Dunn S, Grobler A, et al. Carotid artery intima-media thickness, distensibility, and elasticity: Population epidemiology and concordance in Australian 11-12 year old Australians and their parents. Submitted to BMJ Open October 2017.
18. Larkins N, Kim S, Carlin J, et al. Albuminuria: Population epidemiology and concordance in 11-12 year old Australians and their parents. Submitted to BMJ Open October 2017.
19. Kahn F, Wake M, Lycett K, et al. Vascular function and stiffness: Population epidemiology and concordance in 11-12 year old Australians and their parents. Submitted to BMJ Open October 2017.
20. Fraysse F, Grobler A, Muller J, et al. Physical activity and sedentary activity: Population epidemiology and concordance in 11-12 year old Australians and their parents. Submitted to BMJ Open October 2017.
21. Ellul S, Wake M, Clifford SA, et al. Metabolomics: Population epidemiology and concordance in 11-12 year old Australians and their parents. Submitted to BMJ Open October 2017.
22. Dascalu J, Lui M, Lycett K, et al. Micro-vascular health (retinal microvasculature): Population epidemiology and concordance in 11-12 year old Australians and their parents. Submitted to BMJ Open October 2017.
23. Clifford SA, Gillespie AN, Grobler A, et al. Body composition: Population epidemiology and concordance in 11-12 year old Australians and their parents. Submitted to BMJ Open October 2017.
24. Catchpool M, Gold L, Grobler A, et al. Health-related quality of life: Population epidemiology and concordance in 11-12 year old Australians and their parents. Submitted to BMJ Open October 2017.
25. Wake M, Canterford L, Nicholson J, et al. Options for physical and biomarker augmentation in LSAC: Discussion paper, 2008.
26. Wake M, Gallagher S, Poulakis Z, et al. The Parent Education and Support (PEAS) Program: Final report. Melbourne, Australia: Centre for Community Child Health, Royal Children's Hospital, 2003.
27. Wake M, Baur LA, Gerner B, et al. Outcomes and costs of primary care surveillance and intervention for overweight or obese children: The LEAP 2 randomised controlled trial. *BMJ* 2009;339:b3308.
28. Wake M, Lycett K, Sabin MA, et al. A shared-care model of obesity treatment for 3-10 year old children: Protocol for the HopSCOTCH randomised controlled trial. *BMC Pediatr* 2012;12(1):39.

29. Hanvey AN, Mensah FK, Clifford SA, et al. Adolescent Cardiovascular Functional and Structural Outcomes of Growth Trajectories from Infancy: Prospective Community-Based Study. *Childhood Obes* 2017;13(2):154-63.
30. Hanvey AN, Clifford SA, Mensah FK, et al. Which body composition measures are associated with cardiovascular function and structure in adolescence? *Obesity Medicine* 2016;3:20-27.
31. Marfell-Jones M, Olds T, Stewart A, et al. *International Standards for Anthropometric Assessment*. Potchefstroom, RSA: North-West University, 2006.
32. World Health Organization. Physical status: The use of and interpretation of anthropometry: report of a WHO expert committee. WHO Technical Report Series. Geneva, 1995.
33. Morris NM, Udry JR. Validation of a self-administered instrument to assess stage of adolescent development. *J Youth Adolesc* 1980;9(3):271-80.
34. Petersen AC, Crockett L, Richards M, et al. A self-report measure of pubertal status: Reliability, validity, and initial norms. *J Youth Adolesc* 1988;17(2):117-33.
35. Tan JKL, Tang J, Fung K, et al. Development and Validation of a Comprehensive Acne Severity Scale. *J Cutan Med Surg* 2007;11(6):211-16.
36. Moyer-Mileur LJ, Quick JL, Murray MA. Peripheral quantitative computed tomography of the tibia: pediatric reference values. *J Clin Densitom* 2008;11(2):283-94.
37. Zemel BS. Quantitative computed tomography and computed tomography in children. *Curr Osteoporos Rep* 2011;9(4):284-90.
38. Stein JH, Korcarz CE, Hurst RT, et al. Use of carotid ultrasound to identify subclinical vascular disease and evaluate cardiovascular disease risk: A consensus statement from the American Society of Echocardiography Carotid Intima-Media Thickness Task Force endorsed by the Society for Vascular Medicine. *J Am Soc Echocardiogr* 2008;21(2):93-111.
39. Touboul P-J, Hennerici M, Meairs S, et al. Mannheim carotid intima-media thickness and plaque consensus (2004–2006–2011). *Cerebrovasc Dis* 2012;34(4):290-96.
40. Laurent S, Cockcroft J, Van Bortel L, et al. Expert consensus document on arterial stiffness: Methodological issues and clinical applications. *Eur Heart J* 2006;27(21):2588-605.
41. Zhang A-J, Yu X-J, Wang M. The clinical manifestations and pathophysiology of cerebral small vessel disease. *Neurosci Bull* 2010;26(3):257-64.
42. Miller M, Hankinson J, Brusasco V, et al. Standardisation of spirometry. *Eur Respir J* 2005;26:319-38.
43. Semel E, Wiig E, Secord W. Clinical evaluation of language fundamentals, fourth edition, Australian standardised edition (CELF-4 Australian). Harcourt Assessment, Marrickville (Australia), 2006.
44. Weintraub S, Dikmen SS, Heaton RK, et al. Cognition assessment using the NIH Toolbox. *Neurology* 2013;80(11 Supplement 3):S54-S64.
45. Niskar AS, Kieszak SM, Holmes A, et al. Prevalence of hearing loss among children 6 to 19 years of age: The Third National Health and Nutrition Examination Survey. *JAMA* 1998;279(14):1071-75.
46. Wake M, Poulakis Z, Hughes E, et al. Hearing impairment: A population study of age at diagnosis, severity, and language outcomes at 7–8 years. *Arch Dis Child* 2005;90(3):238-44.
47. Cone BK, Wake M, Tobin S, et al. Slight-mild sensorineural hearing loss in children: Audiometric, clinical, and risk factor profiles. *Ear Hear* 2010;31(2):202-12.

- 1
- 2
- 3 48. Cameron S, Glyde H, Dillon H. Listening in Spatialized Noise-Sentences Test (LiSN-S):
- 4 Normative and retest reliability data for adolescents and adults up to 60 years of age. *J*
- 5 *Am Acad Audiol* 2011;22(10):697-709.
- 6 49. National Acoustic Laboratories. Listening in Spatialised Noise Sentences Test (LiSN-S)
- 7 2016 [Available from: <https://capd.nal.gov.au/lisn-s-about.shtml>].
- 8 50. Eslinger DW, Rowlands AV, Hurst TL, et al. Validation of the GENE Accelerometer.
- 9 *Med Sci Sports Exerc* 2011;43(6):1085-93.
- 10 51. Olds TS, Ridley K, Dollman J, et al. The validity of a computerized use of time recall, the
- 11 multimedia activity recall for children and adolescents. *Pediatr Exerc Sci* 2010;22(1):34-
- 12 43.
- 13 52. Ridley K, Ainsworth BE, Olds TS. Development of a compendium of energy
- 14 expenditures for youth. *Int J Behav Nutr Phys Act* 2008;5:45.
- 15 53. Foley LS, Maddison R, Rush E, et al. Doubly labeled water validation of a computerized
- 16 use-of-time recall in active young people. *Metabolism* 2013;62(1):163-9.
- 17 54. Ortega FB, Ruiz JR, Castillo MJ, et al. Physical fitness in childhood and adolescence: A
- 18 powerful marker of health. *Int J Obes (Lond)* 2008;32(1):1-11.
- 19 55. Boreham CA, Paliczka VJ, Nichols AK. A comparison of the PWC170 and 20-MST tests
- 20 of aerobic fitness in adolescent schoolchildren. *J Sports Med Phys Fitness* 1990;30(1):19-
- 21 23.
- 22 56. Bach M. The Freiburg Visual Acuity test: Automatic measurement of visual acuity.
- 23 *Optom Vis Sci* 1996;73(1):49-53.
- 24 57. Elliot J, Morrow V. Imagining the Future: Preliminary analysis of NCDS essays written
- 25 by children at age 11. London: Centre for Longitudinal Studies, 2007.
- 26 58. Seligson JL, Huebner ES, Valois RF. Preliminary Validation of the Brief
- 27 Multidimensional Students' Life Satisfaction Scale (BMSLSS). *Social Indicators*
- 28 *Research* 2003;61(2):121.
- 29 59. Children's Worlds: International Survey of Children's Well-Being 2017 [Available from:
- 30 <http://iscweb.org>].
- 31 60. Varni JW, Seid M, Kurtin PS. PedsQL 4.0: reliability and validity of the Pediatric Quality
- 32 of Life Inventory version 4.0 generic core scales in healthy and patient populations. *Med*
- 33 *Care* 2001;39(8):800-12.
- 34 61. Richardson J, Iezzi A, Khan MA, et al. Validity and Reliability of the Assessment of
- 35 Quality of Life (AQoL)-8D Multi-Attribute Utility Instrument. *The Patient - Patient-*
- 36 *Centered Outcomes Research* 2014;7(1):85-96.
- 37 62. Stevens K. Assessing the performance of a new generic measure of health-related quality
- 38 of life for children and refining it for use in health state valuation. *Appl Health Econ*
- 39 *Health Policy* 2011;9(3):157-69.
- 40 63. Derogatis LR, Lipman RS, Covi L. SCL-90: An outpatient psychiatric rating scale--
- 41 preliminary report. *Psychopharmacol Bull* 1973;9(1):13-28.
- 42 64. Jones GT, Watson KD, Silman AJ, et al. Predictors of low back pain in British
- 43 schoolchildren: A population-based prospective cohort study. *Pediatrics* 2003;111(4 Pt
- 44 1):822-8.
- 45 65. Flood VM, Webb K, Rangan A. Recommendations for short questions to assess food
- 46 consumption in children for the NSW Health Surveys. 2005.
- 47 66. Saloheimo T, González S, Erkkola M, et al. The reliability and validity of a short food
- 48 frequency questionnaire among 9–11-year olds: A multinational study on three middle-
- 49 income and high-income countries. *Int J Obes Suppl* 2015;5:S22-S28.
- 50 67. Koplin JJ, Wake M, Dharmage SC, et al. Cohort Profile: The HealthNuts Study:
- 51 Population prevalence and environmental/genetic predictors of food allergy. *Int J*
- 52 *Epidemiol* 2015;44(4):1161-71.
- 53
- 54
- 55
- 56
- 57
- 58
- 59

- 1  
2  
3 68. Peters RL, Koplin JJ, Gurrin LC, et al. The prevalence of food allergy and other allergic  
4 diseases in early childhood in a population-based study: HealthNuts age 4-year follow-up.  
5 *J Allergy Clin Immunol* 2017.
- 6 69. Asher M, Keil U, Anderson H, et al. International Study of Asthma and Allergies in  
7 Childhood (ISAAC): Rationale and methods. *Eur Respir J* 1995;8(3):483-91.
- 8 70. Pezic A, Ponsonby AL, Cameron FJ, et al. Constitutive and relative facultative skin  
9 pigmentation among Victorian children including comparison of two visual skin charts  
10 for determining constitutive melanin density. *Photochem Photobiol* 2013;89(3):714-23.
- 11 71. Australian Institute of Family Studies. Longitudinal Study of Australian Children Data  
12 User Guide - November 2013. Melbourne: Australian Institute of Family Studies, 2013.
- 13 72. Davies S, Clifford SA, Gillespie AN, et al. LSAC's Child Health CheckPoint Data Issues  
14 Paper 2017. Melbourne, Australia: Murdoch Children's Research Institute, 2017.
- 15 73. Wake M, Clifford SA, York E, et al. Introducing Growing Up in Australia's Child Health  
16 CheckPoint. *Family Matters* 2014;94:15-23.
- 17 74. Harris PA, Taylor R, Thielke R, et al. Research electronic data capture (REDCap) - A  
18 metadata-driven methodology and workflow process for providing translational research  
19 informatics support. *J Biomed Inform* 2009;42(2):377-81.
- 20 75. Soininen P, Kangas AJ, Wurtz P, et al. High-throughput serum NMR metabolomics for  
21 cost-effective holistic studies on systemic metabolism. *Analyst* 2009;134(9):1781-5.
- 22 76. Kettunen J, Tukiainen T, Sarin AP, et al. Genome-wide association study identifies  
23 multiple loci influencing human serum metabolite levels. *Nat Genet* 2012;44(3):269-76.
- 24 77. Ellul S, Mensah FK, Grobler AC, et al. Technical Paper 1: Development and Use of  
25 CheckPoint Sample Weights. Melbourne: Murdoch Children's Research Institute, 217.
- 26 78. Australian Bureau of Statistics. Australian Statistical Geography Standard (ASGS):  
27 Volume 5 - Remoteness Structure, July 2011 (cat. no. 1270.0.55.005): Australian Bureau  
28 of Statistics, 2011.
- 29 79. Blakemore T, Strazdins L, Gibbings J. Measuring family socioeconomic position.  
30 *Australian Social Policy No 8* 2009:121-68.
- 31 80. Australian Bureau of Statistics. Census of Population and Housing: Socio-Economic  
32 Indexes for Areas (SEIFA) Australia 2011 (cat. no. 2033.0.55.001) [Available from:  
33 <http://www.abs.gov.au/websitedbs/censushome.nsf/home/seifa2011>].
- 34 81. Pearson H. Massive UK baby study cancelled. *Nature* 2015;526:620-21.
- 35 82. Landrigan PJ, Baker DB. The National Children's Study--end or new beginning? *N Engl J*  
36 *Med* 2015;372(16):1486-7.
- 37 83. Schmidt CW. Growing a New Study: Environmental Influences on Child Health  
38 Outcomes. *Environ Health Perspect* 2015;123(10):A260-3.
- 39  
40  
41  
42  
43  
44  
45  
46  
47  
48  
49  
50  
51  
52  
53  
54  
55  
56  
57  
58  
59  
60

# LSAC B Cohort

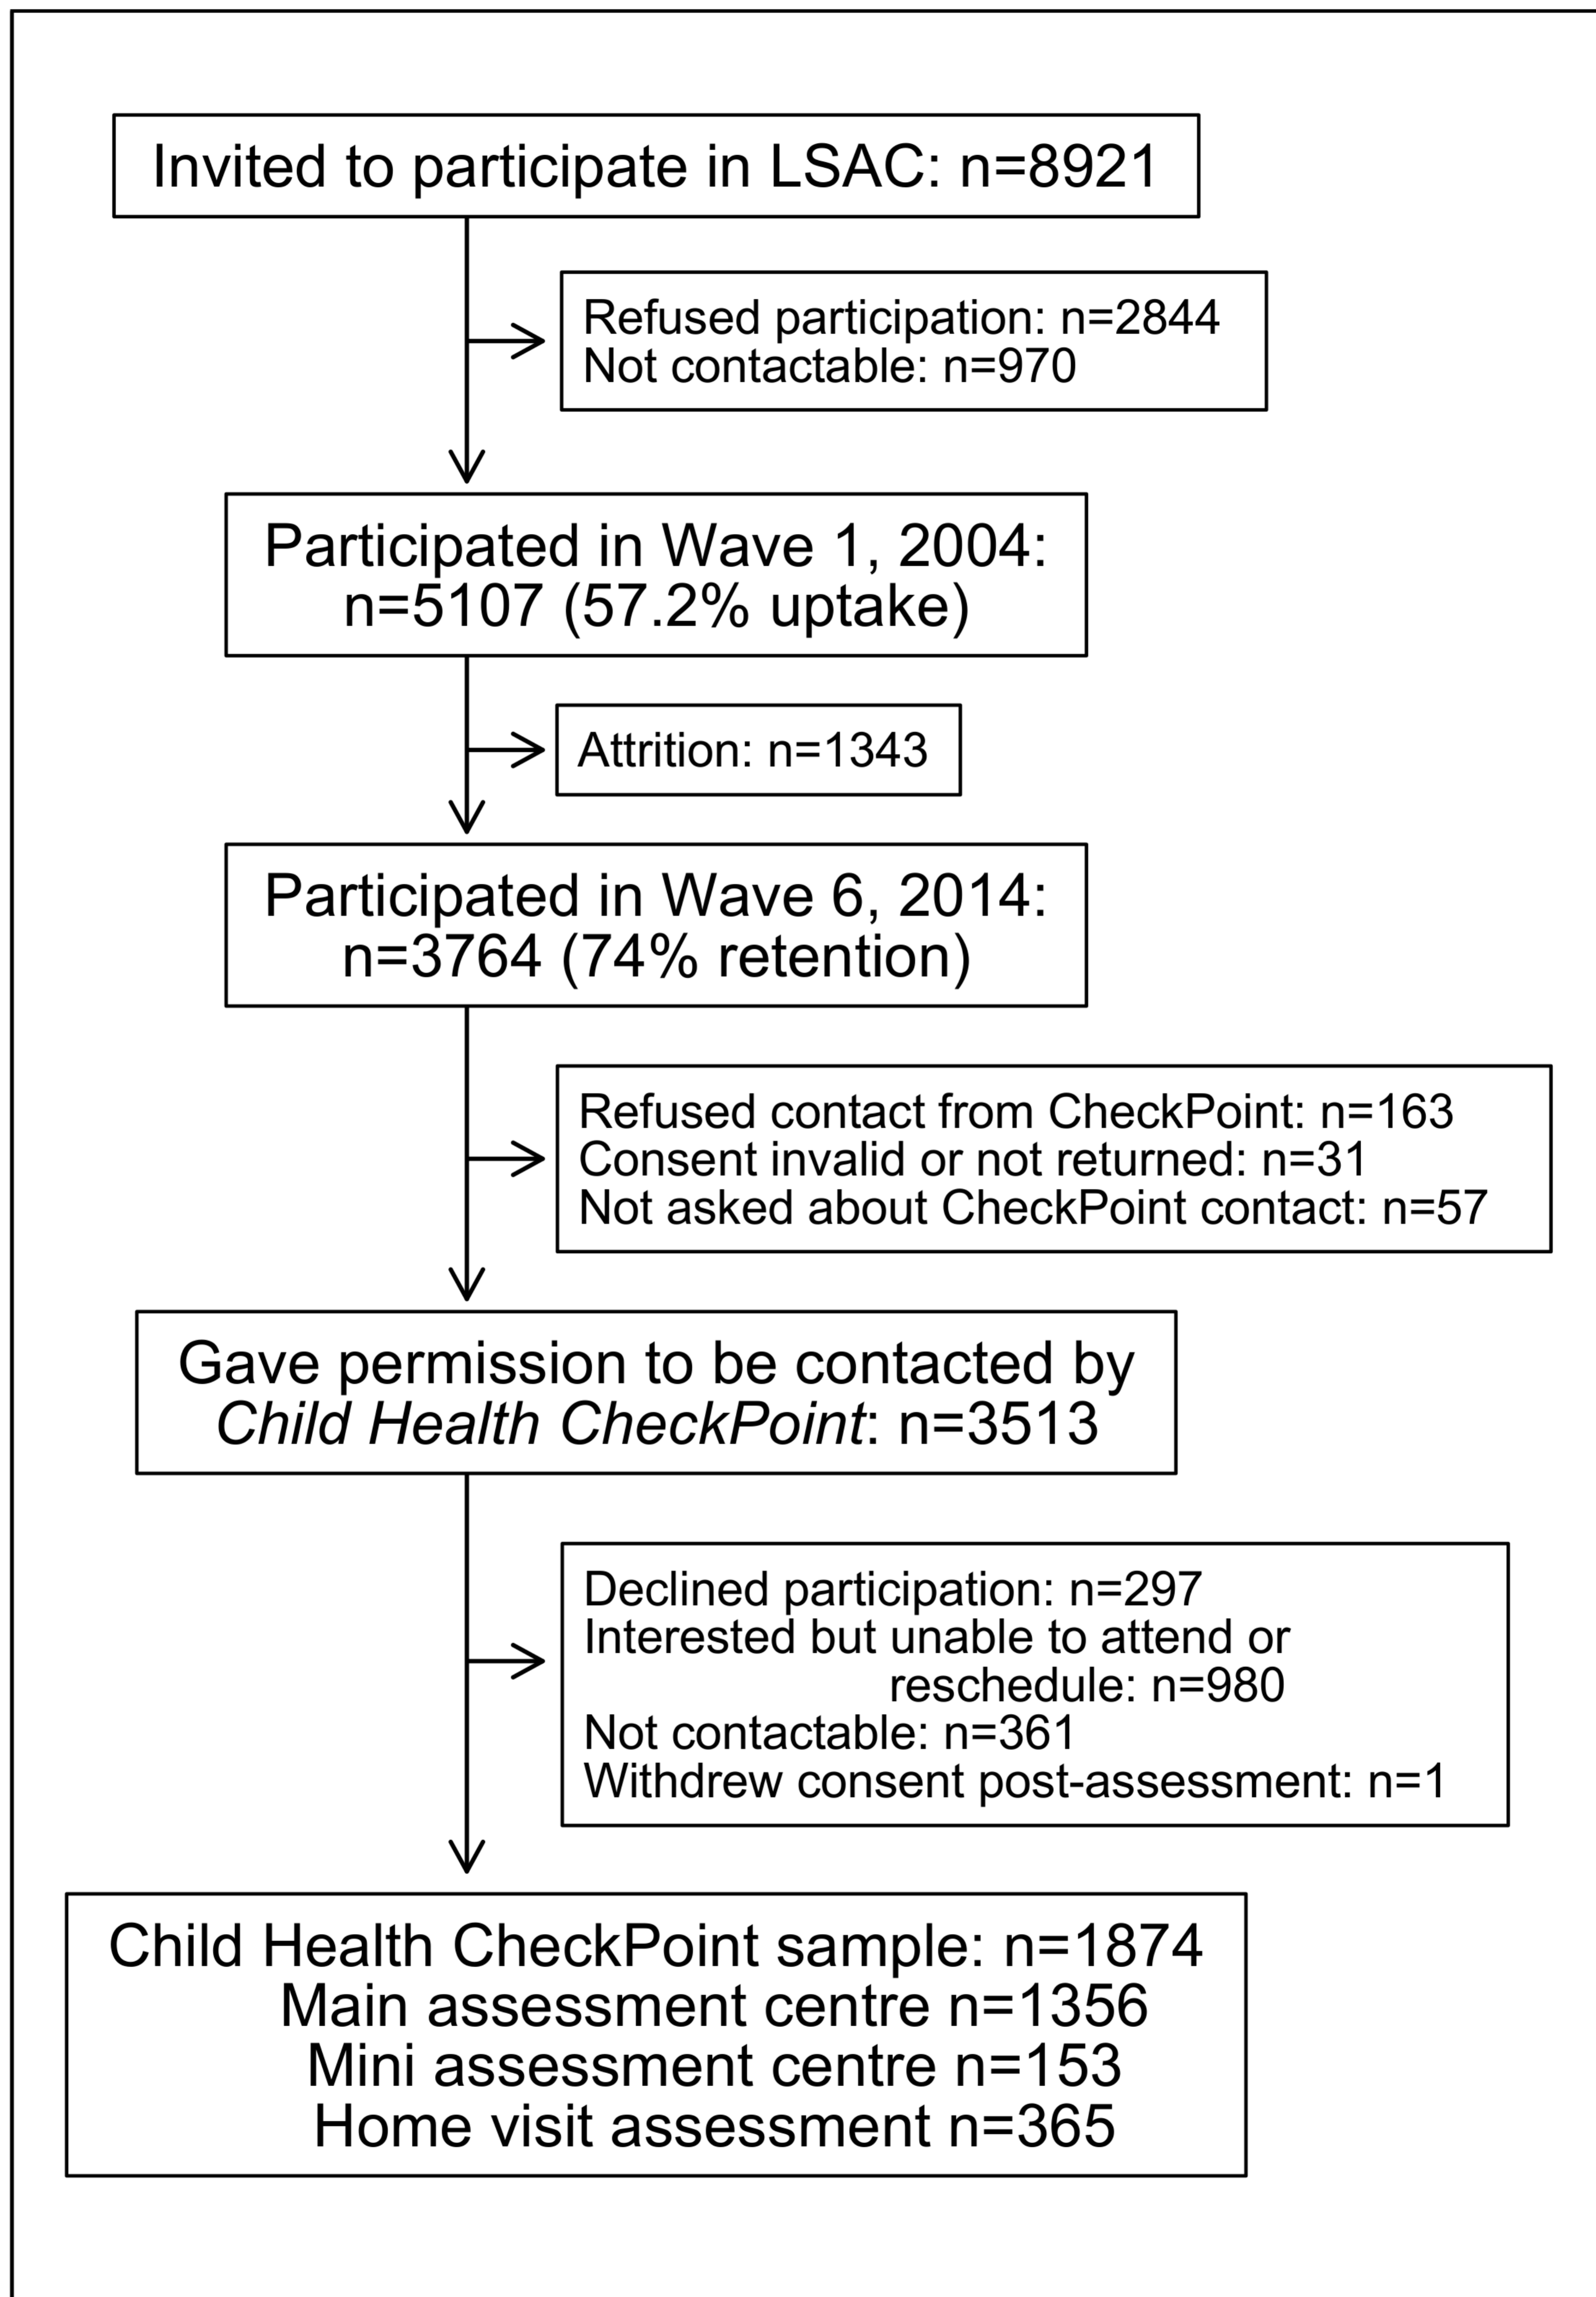

n=number of families, LSAC=Longitudinal Study of Australian Children

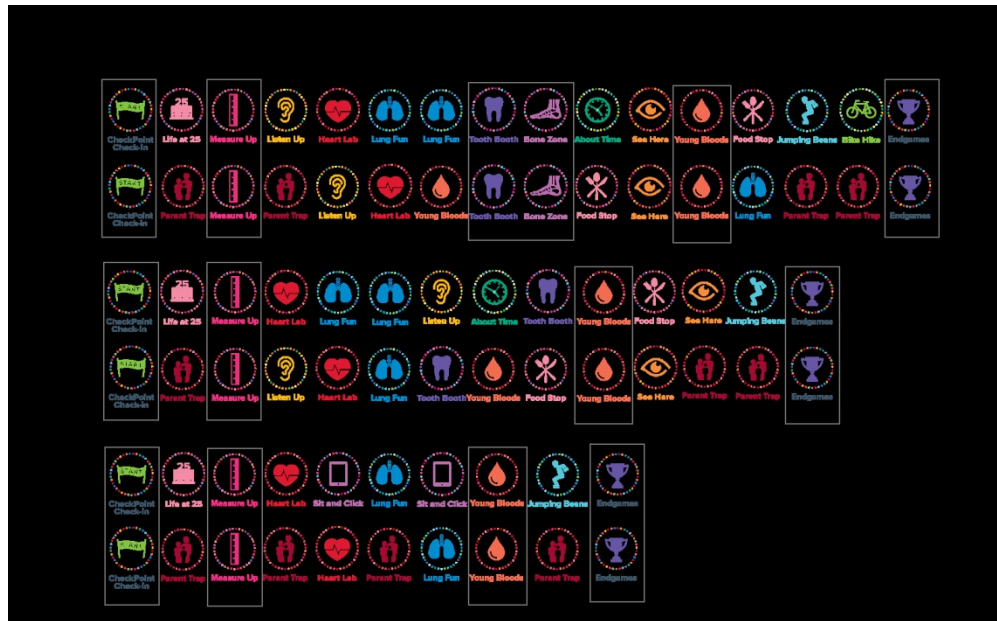

Figure 2. Assessment sequence, by participant and visit type  
 Oblong box indicates child and parent attended the station together. Parents attended the Young Bloods stations twice; first for their own blood collection, then to accompany their child. Food Stop included consumption experiment at the Main Assessment Centre (ie data collected), but was simply offering refreshments at the Mini Assessment Centre (ie no data collected). The NIH Vocabulary Picture Test was administered in Bone Zone at the Main Assessment Centre, and as part of Sit and Click in Mini Assessment Centre and home visits. In home visits, Sit and Click (child questionnaire) had allocated time between other assessments; for the assessment centre visits, Sit and Click didn't have an allocated time or physical location (children completed the questionnaire in downtime at other stations). Post-visit activities (ie accelerometry, child follow-up phone interview and non-attending parent buccal swab) are not included in the diagram and followed the same protocol regardless of visit type.

275x170mm (150 x 150 DPI)

1  
2  
3  
4  
5  
6  
7  
8  
9  
10  
11  
12  
13  
14  
15  
16  
17  
18  
19  
20  
21  
22  
23  
24  
25  
26  
27  
28  
29  
30  
31  
32  
33  
34  
35  
36  
37  
38  
39  
40  
41  
42  
43  
44  
45  
46  
47  
48  
49  
50  
51  
52  
53  
54  
55  
56  
57  
58  
59  
60

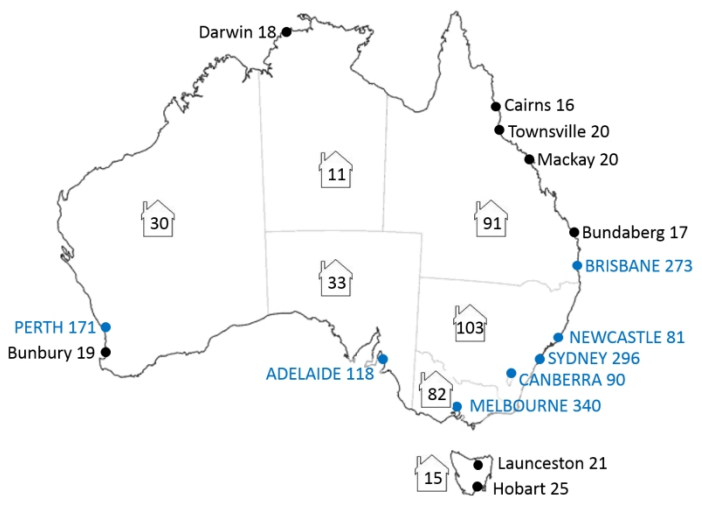

339x190mm (150 x 150 DPI)

STROBE Statement—checklist of items that should be included in reports of observational studies  
**Paper title: *Growing Up in Australia's Child Health CheckPoint cohort summary and methodology***

|                              | Item No | Recommendation                                                                                                                                                                                                                                                               | Page number                           |
|------------------------------|---------|------------------------------------------------------------------------------------------------------------------------------------------------------------------------------------------------------------------------------------------------------------------------------|---------------------------------------|
| <b>Title and abstract</b>    | 1       | (a) Indicate the study's design with a commonly used term in the title or the abstract                                                                                                                                                                                       | 3                                     |
|                              |         | (b) Provide in the abstract an informative and balanced summary of what was done and what was found                                                                                                                                                                          | 3                                     |
| <b>Introduction</b>          |         |                                                                                                                                                                                                                                                                              |                                       |
| Background/rationale         | 2       | Explain the scientific background and rationale for the investigation being reported                                                                                                                                                                                         | 5-6                                   |
| Objectives                   | 3       | State specific objectives, including any prespecified hypotheses                                                                                                                                                                                                             | 6                                     |
| <b>Methods</b>               |         |                                                                                                                                                                                                                                                                              |                                       |
| Study design                 | 4       | Present key elements of study design early in the paper                                                                                                                                                                                                                      | 7                                     |
| Setting                      | 5       | Describe the setting, locations, and relevant dates, including periods of recruitment, exposure, follow-up, and data collection                                                                                                                                              | 7-9,<br>Figure<br>1, Supp<br>Figure 1 |
| Participants                 | 6       | (a) <i>Cohort study</i> —Give the eligibility criteria, and the sources and methods of selection of participants. Describe methods of follow-up<br>(b) <i>Cross-sectional study</i> —Give the eligibility criteria, and the sources and methods of selection of participants | 6, 8                                  |
| Variables                    | 7       | Clearly define all outcomes, exposures, predictors, potential confounders, and effect modifiers. Give diagnostic criteria, if applicable                                                                                                                                     | 10-16,<br>18                          |
| Data sources/<br>measurement | 8*      | For each variable of interest, give sources of data and details of methods of assessment (measurement). Describe comparability of assessment methods if there is more than one group                                                                                         | 10-16                                 |
| Bias                         | 9       | Describe any efforts to address potential sources of bias                                                                                                                                                                                                                    | 19                                    |
| Study size                   | 10      | Explain how the study size was arrived at                                                                                                                                                                                                                                    | 19                                    |
| Quantitative variables       | 11      | Explain how quantitative variables were handled in the analyses. If applicable, describe which groupings were chosen and why                                                                                                                                                 | 18                                    |
| Statistical methods          | 12      | (a) Describe all statistical methods, including those used to control for confounding                                                                                                                                                                                        | 18                                    |
|                              |         | (b) Describe any methods used to examine subgroups and interactions                                                                                                                                                                                                          | N/A                                   |
|                              |         | (c) Explain how missing data were addressed                                                                                                                                                                                                                                  | N/A                                   |
|                              |         | (d) <i>Cohort study</i> —If applicable, explain how loss to follow-up was addressed                                                                                                                                                                                          | 19-20                                 |
|                              |         | (e) Describe any sensitivity analyses                                                                                                                                                                                                                                        | N/A                                   |



|                          |     |                                                                                                                                                                                                              | Page<br>number  |
|--------------------------|-----|--------------------------------------------------------------------------------------------------------------------------------------------------------------------------------------------------------------|-----------------|
| <b>Results</b>           |     |                                                                                                                                                                                                              |                 |
| Participants             | 13* | (a) Report numbers of individuals at each stage of study—eg numbers potentially eligible, examined for eligibility, confirmed eligible, included in the study, completing follow-up, and analysed            | 19,<br>Figure 1 |
|                          |     | (b) Give reasons for non-participation at each stage                                                                                                                                                         | 19,<br>Figure 1 |
|                          |     | (c) Consider use of a flow diagram                                                                                                                                                                           | Figure 1        |
| Descriptive data         | 14* | (a) Give characteristics of study participants (eg demographic, clinical, social) and information on exposures and potential confounders                                                                     | 19-21           |
|                          |     | (b) Indicate number of participants with missing data for each variable of interest                                                                                                                          | 23-25           |
|                          |     | (c) <i>Cohort study</i> —Summarise follow-up time (eg, average and total amount)                                                                                                                             | Figure 1        |
| Outcome data             | 15* | <i>Cohort study</i> —Report numbers of outcome events or summary measures over time                                                                                                                          | N/A             |
|                          |     | <i>Cross-sectional study</i> —Report numbers of outcome events or summary measures                                                                                                                           | N/A             |
| Main results             | 16  | (a) Give unadjusted estimates and, if applicable, confounder-adjusted estimates and their precision (eg, 95% confidence interval). Make clear which confounders were adjusted for and why they were included | 21              |
|                          |     | (b) Report category boundaries when continuous variables were categorized                                                                                                                                    | 21              |
|                          |     | (c) If relevant, consider translating estimates of relative risk into absolute risk for a meaningful time period                                                                                             | N/A             |
| Other analyses           | 17  | Report other analyses done—eg analyses of subgroups and interactions, and sensitivity analyses                                                                                                               | N/A             |
| <b>Discussion</b>        |     |                                                                                                                                                                                                              |                 |
| Key results              | 18  | Summarise key results with reference to study objectives                                                                                                                                                     | 26              |
| Limitations              | 19  | Discuss limitations of the study, taking into account sources of potential bias or imprecision. Discuss both direction and magnitude of any potential bias                                                   | 26-27           |
| Interpretation           | 20  | Give a cautious overall interpretation of results considering objectives, limitations, multiplicity of analyses, results from similar studies, and other relevant evidence                                   | 26-27           |
| Generalisability         | 21  | Discuss the generalisability (external validity) of the study results                                                                                                                                        | N/A             |
| <b>Other information</b> |     |                                                                                                                                                                                                              |                 |
| Funding                  | 22  | Give the source of funding and the role of the funders for the present study and, if applicable, for the original study on which the present article is based                                                | 28-29           |

\*Give information separately for cases and controls in case-control studies and, if applicable, for exposed and unexposed groups in cohort and cross-sectional studies.

**Note:** An Explanation and Elaboration article discusses each checklist item and gives methodological background and published examples of transparent reporting. The STROBE checklist is best used in conjunction with this article (freely available on the Web sites of PLoS Medicine at <http://www.plosmedicine.org/>, Annals of Internal Medicine at <http://www.annals.org/>, and Epidemiology at <http://www.epidem.com/>). Information on the STROBE Initiative is available at [www.strobe-statement.org](http://www.strobe-statement.org).

# BMJ Open

## Child Health CheckPoint: Cohort summary and methodology of a physical health and biospecimen module for the Longitudinal Study of Australian Children

|                                 |                                                                                                                                                                                                                                                                                                                                                           |
|---------------------------------|-----------------------------------------------------------------------------------------------------------------------------------------------------------------------------------------------------------------------------------------------------------------------------------------------------------------------------------------------------------|
| Journal:                        | <i>BMJ Open</i>                                                                                                                                                                                                                                                                                                                                           |
| Manuscript ID                   | bmjopen-2017-020261.R1                                                                                                                                                                                                                                                                                                                                    |
| Article Type:                   | Research                                                                                                                                                                                                                                                                                                                                                  |
| Date Submitted by the Author:   | 05-Feb-2018                                                                                                                                                                                                                                                                                                                                               |
| Complete List of Authors:       | Clifford, Susan; Murdoch Childrens Research Institute, Centre for Community Child Health; The University of Melbourne, Department of Paediatrics<br>Davies, Sarah; Murdoch Childrens Research Institute, Centre for Community Child Health<br>Wake, Melissa; Murdoch Childrens Research Institute; The University of Melbourne, Department of Paediatrics |
| <b>Primary Subject Heading</b>: | Epidemiology                                                                                                                                                                                                                                                                                                                                              |
| Secondary Subject Heading:      | Research methods, Public health, Paediatrics, Epidemiology                                                                                                                                                                                                                                                                                                |
| Keywords:                       | Longitudinal studies, non-communicable disease, biological specimen bank, phenotype, cohort profile, reference values                                                                                                                                                                                                                                     |
|                                 |                                                                                                                                                                                                                                                                                                                                                           |

SCHOLARONE™  
Manuscripts

1  
2  
3 **Child Health CheckPoint: Cohort summary and methodology of a physical health and**  
4 **biospecimen module for the Longitudinal Study of Australian Children.**  
5  
6  
7

8 Susan A. Clifford<sup>1,2</sup>, Sarah Davies<sup>1</sup> and Melissa Wake<sup>1-3</sup>, on behalf of the Child Health  
9 CheckPoint Team.  
10

11 Child Health CheckPoint Team: Peter S. Azzopardi<sup>1,2,4</sup>, Louise A. Baur<sup>5</sup>, David P.  
12 Burgner<sup>1,2,6</sup>, John B. Carlin<sup>1,2</sup>, Michael Cheung<sup>1,2,7</sup>, Terence Dwyer<sup>1,2,8,9</sup>, Ben Edwards<sup>10</sup>,  
13 Susan Ellul<sup>1</sup>, Alanna N. Gillespie<sup>1,2</sup>, Lisa Gold<sup>11</sup>, Anneke C. Grobler<sup>1</sup>, Jessica A. Kerr<sup>1,2</sup>,  
14 Kate Lycett<sup>1,2</sup>, Katherine Lange<sup>1</sup>, Fiona K. Mensah<sup>1,2</sup>, Tim S. Olds<sup>1,12</sup>, Sarath  
15 Ranganathan<sup>1,2,13</sup>, Helen Rogers<sup>14</sup>, Richard Saffery<sup>1,2</sup>, Michael Sawyer<sup>15,16</sup>, Peter J.  
16 Simm<sup>1,2,17</sup>, Luke Stevens<sup>1</sup>, Tien Y. Wong<sup>18-20</sup> and Stephen R. Zubrick<sup>21,22</sup>.  
17  
18  
19  
20  
21  
22

23 **Affiliations:** <sup>1</sup>Murdoch Children's Research Institute, Parkville, Victoria, Australia;  
24 <sup>2</sup>Department of Paediatrics, The University of Melbourne, Parkville, Victoria, Australia;  
25 <sup>3</sup>Department of Paediatrics and The Liggins Institute, The University of Auckland, Grafton,  
26 Auckland, New Zealand; <sup>4</sup>Maternal and Child Health Program, International Development  
27 Discipline, Burnet Institute, Melbourne, Victoria, Australia; <sup>5</sup>The Discipline of Child and  
28 Adolescent Health, The University of Sydney, Westmead, New South Wales, Australia;  
29 <sup>6</sup>Department of Paediatrics, Monash University, Clayton, Victoria, Australia; <sup>7</sup>Cardiology  
30 Department, The Royal Children's Hospital, Parkville, Victoria, Australia; <sup>8</sup>Nuffield  
31 Department of Obstetrics and Gynaecology, The George Institute for Global Health,  
32 University of Oxford, Oxford, United Kingdom. <sup>9</sup>Institute for Medical Research, University  
33 of Tasmania, Hobart, Tasmania, Australia; <sup>10</sup>Australian National University Centre for Social  
34 Research and Methods, Canberra, Australian Capital Territory, Australia; <sup>11</sup>School of Health  
35 and Social Development, Deakin University, Geelong, Victoria, Australia; <sup>12</sup>Alliance for  
36 Research in Exercise, Nutrition and Activity, University of South Australia, Adelaide, South  
37 Australia, Australia; <sup>13</sup>Respiratory and Sleep Medicine Department, The Royal Children's  
38 Hospital, Parkville, Victoria, Australia; <sup>14</sup>National Centre for Longitudinal Data, Department  
39 of Social Services, Canberra, Australian Capital Territory, Australia; <sup>15</sup>School of Medicine,  
40 University of Adelaide, Adelaide, South Australia, Australia; <sup>16</sup>Research and Evaluation Unit,  
41 Women's and Children's Health Network, Adelaide, South Australia, Australia;  
42 <sup>17</sup>Endocrinology and Diabetes Department, The Royal Children's Hospital, Parkville,  
43 Victoria, Australia; <sup>18</sup>Singapore Eye Research Institute, Singapore National Eye Centre,  
44 Singapore; <sup>19</sup>Department of Ophthalmology, Yong Loo Lin School of Medicine, National  
45  
46  
47  
48  
49  
50  
51  
52  
53  
54  
55  
56  
57  
58  
59  
60

1  
2  
3 University of Singapore and National University Health System, Singapore; <sup>20</sup>Ophthalmology  
4 and Visual Sciences Academic Clinical Programme, Duke-NUS Medical School, National  
5 University of Singapore, Singapore; <sup>21</sup>Telethon Kids Institute, Subiaco, Western Australia,  
6 Australia. <sup>22</sup>Graduate School of Education, University of Western Australia, Crawley,  
7 Western Australia, Australia.  
8  
9  
10  
11  
12

13 **Correspondence to:** Professor Melissa Wake,  
14  
15 Murdoch Children's Research Institute  
16 The Royal Children's Hospital  
17 50 Flemington Road, Parkville 3052, VIC Australia.  
18 Telephone: +61 3 9345 5761  
19 Email: [melissa.wake@mcri.edu.au](mailto:melissa.wake@mcri.edu.au)  
20  
21  
22  
23  
24

25 **Keywords:** Cohort profile; non-communicable disease; biological specimen bank;  
26 phenotype; reference values; parents; children; epidemiologic studies; cross-sectional studies;  
27 longitudinal studies.  
28  
29  
30

31 **Word count:** 5043  
32  
33

34 **Abbreviations:** ABS: Australian Bureau of Statistics; ACR: albumin-creatinine ratio;  
35 AQoL-8D: Assessment of Quality of Life 8D; BIA: Bioelectrical impedance analysis; BP:  
36 Blood pressure; Ca: California, USA; ECHO: US Environmental Influences On Child Health  
37 Outcomes Program; FrACT: Freiburg Visual Acuity and Contrast Test; ISCW: International  
38 Survey of Children's Wellbeing; kHz: kilohertz; LiH: Lithium Heparin; LiSN-S: Listening in  
39 Spatialised Noise – Sentence Test; LSAC: Longitudinal Study of Australian Children;  
40 MARCA: Multimedia Activity Recall for Children and Adults; MCRI: Murdoch Children's  
41 Research Institute; NaSSDA: National Secondary Students' Diet and Activity; NCD: non-  
42 communicable disease(s); NHMRC: Australian National Health and Medical Research  
43 Council; NIH: National Institutes of Health; NMR: nuclear magnetic resonance; NSW: New  
44 South Wales, Australia; NPVT: National Institute of Health Picture Vocabulary test; pQCT:  
45 Peripheral quantitative computed tomography; PedsQL: Pediatric Quality of Life; REDCap:  
46 Research Electronic Data Capture; SD: standard deviation; UK: United Kingdom; USA:  
47 United States of America; VO<sub>2</sub>max: Maximum volume of oxygen consumed; 2D: Two  
48 dimensional; 3D: Three dimensional.  
49  
50  
51  
52  
53  
54  
55  
56  
57  
58  
59  
60

## ABSTRACT

**Objectives:** *'Growing Up in Australia: The Longitudinal Study of Australian Children'* (LSAC) is Australia's only nationally-representative children's longitudinal study, focusing on social, economic, physical and cultural impacts on health, learning, social and cognitive development. LSAC's first decade collected wide-ranging repeated psychosocial and administrative data; here, we describe the Child Health CheckPoint, LSAC's dedicated biophysical module.

**Design, setting, participants:** LSAC recruited a cross-sequential sample of 5107 0-1 and 4983 4-5 year olds in 2004, since completing seven biennial visits. CheckPoint was a cross-sectional wave that travelled Australia in 2015-16, to reach LSAC's younger cohort at age 11-12 years between LSAC waves 6 and 7. Parent-child pairs participated in comprehensive assessments at 15 Assessment Centres nationwide or, if unable to attend, a shorter home visit.

**Measures:** CheckPoint's intergenerational, multidimensional measures were prioritised to show meaningful variation within normal ranges and capture non-communicable disease (NCD) phenotype precursors. These included anthropometry, physical activity, fitness, time-use, vision, hearing, and cardiovascular, respiratory and bone health. Biospecimens included blood, saliva, buccal swabs (also from second parent), urine, hair and toenails. The epidemiology and parent-child concordance of many measures are described in separate papers.

**Results:** 1874 (54% of eligible) parent-child pairs and 1051 second parents participated. Participants' geographical distribution mirrored the broader Australian population; however, mean socioeconomic position and parental education were higher and fewer reported non-English speaking or Indigenous backgrounds. Application of survey weights partially mitigates that the achieved sample is less population-representative than previous waves of LSAC due to non-random attrition. Completeness was uniformly high for phenotypic data (>92% of eligible), biospecimens (74-97%) and consent (genetic analyses 98%, accessing neonatal blood spots 97%, sharing 96%).

**Conclusions:** CheckPoint enriches LSAC to study how NCDs develop at the molecular and phenotypic levels before overt disease emerges, and clarify the underlying dimensionality of health in childhood and mid-adulthood.

## ARTICLE SUMMARY

### Strengths and limitations of this study

- The Child Health CheckPoint aimed to enrich the ongoing Longitudinal Study of Australian Children (LSAC) with sophisticated health assessments and biological samples.
- Strengths include LSAC's existing rich decade-long exposure and administrative data for the child and both parents, and CheckPoint's collection of cross-generational parent-child assessments paired on time/date of assessment, protocols and equipment; timing of the module to capture early adolescence; and timely public release of data to researchers (within two years of collection).
- Families living in regional areas or with lower socioeconomic positions are under-represented; however, sample weights are available that enable analyses that are more reflective of the original design sample of Australian children and their families.
- For each child participant, only one parent (predominantly the mother) undertook the detailed paired assessments, but the second parent contributed a buccal (DNA) sample, where possible.
- Access policies are in place for future extraction of extensive additional data from the digital and biospecimen repositories held at the Murdoch Children's Research Institute.

## INTRODUCTION

Worldwide there is a large and growing burden of non-communicable diseases (NCDs). Many have their genesis in early life, and develop over decades of cumulative exposures. This provides opportunities to prevent, slow or alter disease trajectories at multiple points of the lifecourse. Wide gradients within the normal range of phenotypes relevant to many later NCDs are already measurable across many body systems from childhood.

It is evident that family, social and other environmental factors interact with an individual's innate biology (including genetic profile) to create modifiable pathways (such as chronic inflammation) common to multiple NCDs.<sup>1</sup> Shonkoff's biodevelopmental framework of lifecourse determinants of health and their mechanisms proposes that health-promoting and health-threatening environmental effects interact with genes and affect later health, via physiological adaptations during sensitive periods and cumulative effects over time.<sup>1</sup> These physiological adaptations are the key intermediary step, which may be measured years or decades before overt ill health develops.

'Big picture' research into physiological adaptations and objective health outcomes has shifted from narrowly-focused hypothesis-driven studies with a single outcome, towards multidisciplinary and/or multidimensional research with outcomes across multiple domains that recognise the interconnectedness of health.<sup>2 3</sup> Around the start of the millennium, many countries launched large-scale birth cohort studies (eg UK Millennium Cohort,<sup>4</sup> Growing Up in Ireland,<sup>5</sup> New Zealand,<sup>6</sup> Singapore<sup>7</sup>). Australia's study, *Growing Up in Australia: The Longitudinal Study of Australian Children (LSAC)* was intended to provide a strong evidence base for policy development and service delivery on a wide range of issues relating to children's development and lifetime wellbeing.<sup>8</sup>

LSAC is a population-based cohort study from early childhood, and is the country's only nationally-representative children's longitudinal study. It is broad in scope, surveying lifetime pathways in health, learning and development. Its design incorporates frequent (biennial) and ongoing data collection; multiple study respondents; linkage to lifetime universal parent and child administrative data including health care (eg lifetime primary health services, medication prescriptions dispensed), education (eg national literacy and numeracy exam results) and census datasets; and open access to the datasets for researchers. The federal government investment into LSAC is yielding major returns that influence policy,<sup>9</sup> with several hundred publications in the first decade of the study (listed at <http://flosse.fahcsia.gov.au/>). Adopting a dual cross-sequential design, LSAC recruited two cohorts in 2004, each comprising ~5000

1  
2  
3 children. At recruitment, the K cohort children were aged 4-5 years (n=4984 families, 50.4%  
4 update; figure 1), and B cohort 0-1 year old (n=5107 families, 57.2% uptake). A two-stage  
5 random sampling design was applied, first randomly selecting 10% of postcodes (stratified by  
6 state and urban/rural locations), then in-age children within those postcodes from the Medicare  
7 database.<sup>10</sup> Medicare is an Australian government program within the universal health care  
8 system that reduces or covers medical visit and medication costs, into which 98% of children  
9 are enrolled by their first birthday.<sup>10</sup> Very remote postcodes and those with <20 children (n=874  
10 postcodes, 3.2% of population) were excluded. At wave 6 (child age 10-11), 74% of the original  
11 B cohort were retained; families with Indigenous or non-English speaking backgrounds, or  
12 incomes less than \$1000 per week were under-represented in later waves.<sup>11</sup>

13  
14  
15 Like other government-implemented children's studies internationally, LSAC has mainly  
16 focused on psychosocial and demographic exposures, with all health items except  
17 anthropometry and blood pressure being parent- or self-reported. A physical health and  
18 biospecimens module was beyond the scope of the original study design. There was also  
19 uncertainty as to how such a biomarker module might impact (whether positively or negatively)  
20 on cohort retention and engagement.

21  
22  
23 To address this gap, we recently introduced an intergenerational physical health and biomarkers  
24 module, the Child Health CheckPoint. This one-off cross-sectional wave, nested between  
25 LSAC waves 6 and 7, was offered to the B cohort at child age 11-12 years. CheckPoint's  
26 intergenerational, multidimensional measures were prioritised to show meaningful variation  
27 within normal ranges and capture non-communicable disease (NCD) phenotype precursors  
28 both in adults and children. Wherever possible we captured raw digital data (eg images, traces)  
29 that would support additional extraction and analysis beyond the core phenotypic summary  
30 data (eg blood pressure readings). The broad set of paired measures, collected on parent-child  
31 dyads on the same day with identical equipment, was designed to allow researchers to  
32 simultaneously examine multiple phenotypes in both ages as well as the intergenerational  
33 transmission of health. In this paper, we describe the Child Health CheckPoint methods and  
34 sample characteristics. This allows researchers to understand and make best use of the robust  
35 dataset and biospecimens. Other papers in this BMJ Open Special Issue explore the  
36 epidemiology and parent-child concordance of individual measures in greater depth.<sup>12-25</sup>



## METHODS

**Study design:** LSAC is a longitudinal child cohort study conducted in partnership between the Australian Government Department of Social Services, the Australian Institute of Family Studies and the Australian Bureau of Statistics. It is funded by the Australian Government.

The Child Health CheckPoint was conducted between February 2015 and March 2016, at child age 11-12 years. The CheckPoint was offered to the B cohort because: (a) it contains more detailed pregnancy and birth data; (b) LSAC's data collections span the children's entire postnatal lives; (c) by this child age, there is a wide range in normal values of risk factors predicting adult preclinical markers of disease; and (d) experience suggested that the health measurements would be of greater interest (and so attract higher uptake) to children and parents at this age than to the K-cohort of 15–16 year olds, an age when many birth cohorts experience heightened attrition.<sup>26-28</sup>

**Study development:** In 2007, the Department of Social Services commissioned a scoping report on the potential value, content and cost of a physical health and biomarkers module.<sup>29</sup> A partnership was formed between LSAC senior management, LSAC researchers and child health researchers new to LSAC with physical health and biomarkers content expertise. In 2012, researchers at the Murdoch Children's Research Institute (MCRI) partnered with investigators at the University of South Australia, University of Adelaide and Deakin University to form the CheckPoint Investigator Team and to lead a successful application to the Australian National Health and Medical Research Council (NHMRC Project Grant 1041352, 2013-17). This core funding enabled the child cardiorespiratory measures and leveraged additional institutional, competitive (NHMRC Project Grant 1109355, 2016-2020) and philanthropic funding, such that the CheckPoint ultimately encompassed a much wider range of health domains underpinning NCDs across two generations.

Feasibility of core CheckPoint assessments were tested in 2014 within the '3C' study; a longitudinal study of 378 7-17 year olds in the MCRI's existing PEAS,<sup>30</sup> LEAP2<sup>31</sup> and HopSCOTCH<sup>32</sup> cohorts examining cardiovascular outcomes of lifecourse growth, diet and activity.<sup>33 34</sup>

Late in 2014, we tested the CheckPoint protocol with a vanguard of 52 Victorian LSAC families to fine-tune recruitment, visit flow, timing and feasibility, and test acceptability of the centre-based suite of measures ahead of the much larger bulk of children due to attend in 2015-16. Child and parent participants prospectively rated enjoyment of each assessment and overall

1  
2  
3 impressions (scored out of 10). Participants were also asked to rate how the CheckPoint module  
4 changed their feeling about being in LSAC overall, from 0 (Now I like it much less) to 10 (Now  
5 I like it much more).  
6  
7

8  
9 **Participants:** LSAC B cohort families who completed a wave 6 home interview were eligible.  
10 The study child and one parent were invited to participate in comprehensive health assessments  
11 at an Assessment Centre or home visit. Choice of parent and whether or not biological was  
12 determined by the family; in practice this 'attending parent' was usually the mother. Second  
13 biological parents living with the child, if available, were also invited to participate after the  
14 visit by contributing a buccal swab.  
15  
16  
17  
18

19  
20 **Ethical approval and consent:** The CheckPoint study was approved by The Royal Children's  
21 Hospital Melbourne Human Research Ethics Committee (33225D) and the Australian Institute  
22 of Family Studies Ethics Committee (14-26); the latter also provides ethical review and  
23 approval for LSAC at every wave. A parent or guardian provided written consent for their own  
24 and their child's participation in the study. Optional consent was requested for the collection,  
25 storage and non-genetic analysis of biospecimens; genetic analyses of these samples; sharing  
26 images and samples with other researchers; and access to the child's birth data and dried  
27 newborn heel-prick blood samples that are stored indefinitely by most Australian states. Non-  
28 attending biological parents provided written consent for the storage and non-genetic analysis  
29 of their buccal swab, and optional consent for genetic analysis was requested. Participants were  
30 aware that no health, genetic or other information would be returned to them, beyond a  
31 summary of physical health measurements (body mass index, blood pressure, etc.) provided at  
32 the end of the visit.  
33  
34  
35  
36  
37  
38  
39  
40  
41

42  
43 **Patient and Public Involvement:** Because LSAC is a population-based longitudinal study, no  
44 patient groups were involved in its design or conduct. To our knowledge, the public was not  
45 involved in the study design, recruitment or conduct of LSAC study or its CheckPoint module.  
46 Parents received a summary health report for their child and themselves at or soon after the  
47 CheckPoint assessment visit. They consented to take part knowing that they would not  
48 otherwise receive individual results about themselves or their child.  
49  
50  
51  
52

53  
54 **Procedure:** Participation in the CheckPoint involved (i) an Assessment Centre or home visit  
55 for the child and attending parent, (ii) follow-up phone interview for the child, (iii) a week of  
56 wearing an accelerometer (physical activity monitor) for the child and attending parent, and  
57 (iv) a buccal (DNA) sample collection at home for the non-attending parent. Assessments and  
58 phone interviews were conducted by trained research assistants and students.  
59  
60

1  
2  
3 *Sample recruitment:* B cohort families were briefly introduced to the upcoming Child Health  
4 CheckPoint during the LSAC wave 6 home interview in 2014. A total of 3513 families (93%  
5 of wave 6 families and 69% of original cohort, see figure 1) gave written consent to be  
6 contacted by the CheckPoint team.  
7  
8  
9

10 *Assessment visit types and locations:* The core CheckPoint data collection mechanism was the  
11 'pop-up' Main Assessment Centre, set up in seven major Australian cities (supplementary figure  
12 1) sequentially for between 2-8 weeks before being packed up and transported by road to the  
13 next location. On each operating day, up to 24 families were invited to attend the Assessment  
14 Centre for a 3½-hour visit.  
15  
16  
17  
18

19 Road transport between Australian cities can take days. To maximise the size and geographic  
20 reach of the sample, 'pop-up' Mini Assessment Centres operated in eight regional cities for up  
21 to a week while the bulk of equipment was in transit. The 2¾-hour Mini Assessment Centre  
22 visit included most of the assessments offered at the Main Assessment Centres, except those  
23 requiring large equipment unable to be checked in as personal luggage on commercial flights.  
24 Those unable to attend an Assessment Centre were offered a 1½-hour home visit with a subset  
25 of measures that could be conducted in the home by a trained research assistant (ie not a  
26 phlebotomist) using portable equipment. Home visits occurred in Main Assessment and Mini  
27 Assessment Centre cities, and other regional towns.  
28  
29  
30  
31  
32  
33  
34

35 In total, the study visited over 30 cities and towns over the one-year data collection period  
36 (supplementary figure 1). The Assessment Centre operated in 15 cities and towns. This number  
37 was constrained by the fixed data collection window and budget (i.e. substantial time and costs  
38 of setting up in each location, regardless of the number of participants seen). The specific  
39 locations chosen were the cities and towns with the largest clusters of B cohort participants.  
40 Using mapping software, we plotted participants residing within 2 hours travel radius of each  
41 regional city. If the regional city had the necessary infrastructure for a Mini Assessment centre  
42 and at least 40 eligible families within the radius, we set up a centre; otherwise we offered  
43 Home Visits. Most families (72%) attended a Main Assessment Centre, 8% attended a Mini  
44 Assessment Centre and 20% completed a home visit. Table 1 reports the assessments offered  
45 at each visit type, and figure 1 the sample size per visit type.  
46  
47  
48  
49  
50  
51  
52  
53  
54  
55  
56  
57  
58  
59  
60

**Table 1. Summary of measurements and biological samples collected in CheckPoint assessments**

| Construct & Measure                                       | Main Mini Home |      |      | Station | Equipment/instrument*                                                                                                                                                                                              | Data/sample collection protocol in brief                                                                                                                                               |
|-----------------------------------------------------------|----------------|------|------|---------|--------------------------------------------------------------------------------------------------------------------------------------------------------------------------------------------------------------------|----------------------------------------------------------------------------------------------------------------------------------------------------------------------------------------|
|                                                           | Ch P           | Ch P | Ch P |         |                                                                                                                                                                                                                    |                                                                                                                                                                                        |
| <b>Anthropometry</b>                                      |                |      |      |         |                                                                                                                                                                                                                    |                                                                                                                                                                                        |
| Height <sup>35 36</sup>                                   | ●              | ●    | ●    | ●       |  Portable rigid stadiometer (Invicta IP0955, Leicester, UK).                                                                      | Standing height without shoes or socks, measured x2, or x3 if first two measures differed by $\geq 0.5$ cm.                                                                            |
| Weight and body composition <sup>35 36</sup>              | ●              | ●    | ●    | ●       |  4-limb segmental (InBody230, Biospace, Seoul, Korea) or 2-limb (Tanita BC-351, Kewdale, Australia) body composition scales.      | Weight and body composition wearing light clothing without shoes or socks, measured once.                                                                                              |
| Waist circumference <sup>35 36</sup>                      | ●              | ●    | ●    | ●       |  Steel anthropometric measuring tape (Lufkin Executive Diameter W606PM, Maryland, USA).                                           | Waist circumference at the narrowest point between the 10th rib and iliac crest, or midpoint between if no visible narrowing. Measured x2, or x3 if first two differed by $\geq 1$ cm. |
| <b>Pubertal status</b>                                    |                |      |      |         |                                                                                                                                                                                                                    |                                                                                                                                                                                        |
| Pubertal development                                      | ●              | ●    | ●    | ●       |  Sexual Maturity Scale. <sup>37</sup><br>Pubertal Development Scale. <sup>38</sup>                                                | Sexual maturity assessed using three sets of images (1 male and 2 female) showing stages of puberty.<br>Pubertal progress assessed using five sex-specific questions.                  |
| Menstruation                                              | ●              | ●    | ●    | ●       |   Study-designed questions about menstruation. | Self-reported current menstruation (females only).<br>Age of menstruation onset (girls only).                                                                                          |
| Acne                                                      | ●              | ●    | ●    | ●       |  Modified Comprehensive Acne Severity Scale for the face. <sup>39</sup>                                                         | Current acne severity assessed using a sex-specific 5-point pictorial scale.                                                                                                           |
| <b>Bone and muscle measures</b>                           |                |      |      |         |                                                                                                                                                                                                                    |                                                                                                                                                                                        |
| Bone and muscle morphology, bone density <sup>40 41</sup> | ●              | ●    |      |         |  Peripheral quantitative computed tomography (pQCT, Stratec XCT 2000L scanner and XCT 2000 software, Birkenfeld, Germany).      | Two pQCT scans of the non-dominant lower leg to image bone and muscle density and morphology.<br>Scans taken at 4% (above ankle) and 66% (mid-calf) length of the tibia.               |

| Construct & Measure                                                | Main Mini Home |      |      | Station                                                                             | Equipment/instrument*                                                                                                                                                  | Data/sample collection protocol in brief                                                                                                                                                                                     |
|--------------------------------------------------------------------|----------------|------|------|-------------------------------------------------------------------------------------|------------------------------------------------------------------------------------------------------------------------------------------------------------------------|------------------------------------------------------------------------------------------------------------------------------------------------------------------------------------------------------------------------------|
|                                                                    | Ch P           | Ch P | Ch P |                                                                                     |                                                                                                                                                                        |                                                                                                                                                                                                                              |
| <b>Cardiovascular measures</b>                                     |                |      |      |                                                                                     |                                                                                                                                                                        |                                                                                                                                                                                                                              |
| Carotid intima-media thickness and distensibility <sup>42 43</sup> | ● ●            | ● ●  |      |    | Portable ultrasound (GE Healthcare Vivid i BT06 with 10MHz linear array probe, Little Chalfont, UK) with ECG.                                                          | Performed in supine position with head turned 45 degrees to the left. Probe applied to right side of the neck to capture carotid artery wall images, with concurrent ECG trace.                                              |
| Arterial stiffness and blood pressure <sup>44</sup>                | ● ●            | ● ●  | ● ●  |    | SphygmoCor XCEL (AtCor Medical, West Ryde, AUS).                                                                                                                       | Aortic-femoral pulse wave velocity measured x3, supine, using a tonometer on the neck and blood pressure (BP) cuff on the thigh. Pulse wave analysis (including BP) measured x3, 1 minute apart, using a BP cuff on the arm. |
| Microvascular structure <sup>45</sup>                              | ● ●            |      |      |    | Retinal camera (Canon CR-DGi, Tokyo, Japan), fitted with a digital SLR camera (Canon EOS 60D, Tokyo, Japan).                                                           | In a darkened room without mydriasis, two retinal photographs were taken per eye, one focused on the macula and one focused on the optic disc.                                                                               |
| <b>Respiratory measures</b>                                        |                |      |      |                                                                                     |                                                                                                                                                                        |                                                                                                                                                                                                                              |
| Lung function                                                      | ● ●            | ● ●  | ● ●  |    | Spirometer <sup>46</sup> (Vyntus, California (Ca), USA) and Sentry Suite software (Ca, USA) for collection (v2.10) and download (v2.17).                               | Children and parents perform 3-8 maximal exhalation manoeuvres. Children inhale 4 puffs of bronchodilator (Ventolin), wait 10 minutes, and repeat test.                                                                      |
| <b>Language</b>                                                    |                |      |      |                                                                                     |                                                                                                                                                                        |                                                                                                                                                                                                                              |
| Expressive and receptive language                                  | ● ●            | ● ●  |      |  | Recalling Sentences subtest, Pearson Clinical Evaluation of Language Fundamentals–4th edition, Australian version, <sup>47</sup> iPad (Apple, Ca, USA) and headphones. | Participant recalls and repeats up to 32 recorded spoken sentences of varying length and syntactic complexity.                                                                                                               |
| Receptive vocabulary                                               | ● ●            | ● ●  | ● ●  |  | National Institutes of Health Picture Vocabulary test <sup>48</sup> (NIH Toolbox software with Cognition package), iPad & headphones.                                  | Participant hears word and selects picture best representing the words meaning. Adaptive test using computer-based algorithms to quickly approximate and then precisely pinpoint participant ability.                        |

| Construct & Measure                                         | Main Mini Home |      |      | Station | Equipment/instrument*                                                                                                                                                                                                                          | Data/sample collection protocol in brief                                                                                                                                                                                |                                                                                                                                                             |
|-------------------------------------------------------------|----------------|------|------|---------|------------------------------------------------------------------------------------------------------------------------------------------------------------------------------------------------------------------------------------------------|-------------------------------------------------------------------------------------------------------------------------------------------------------------------------------------------------------------------------|-------------------------------------------------------------------------------------------------------------------------------------------------------------|
|                                                             | Ch P           | Ch P | Ch P |         |                                                                                                                                                                                                                                                |                                                                                                                                                                                                                         |                                                                                                                                                             |
| <b>Hearing</b>                                              |                |      |      |         |                                                                                                                                                                                                                                                |                                                                                                                                                                                                                         |                                                                                                                                                             |
| Hearing threshold <sup>49 50</sup>                          | ●              | ●    | ●    | ●       |  Audiometer (Oscilla USB-330, version 3.3.4, Taastrup, Denmark) and Oscilla headphones. Data exported using version 4.0.0.                                    | In a soundproof booth with headphones, participant presses button on hearing sound. Adaptive test: sound presented at increasing and decreasing volume at 4 frequencies (1, 2, 4, 8 kHz). Each ear tested separately.   |                                                                                                                                                             |
| Middle ear function <sup>51</sup>                           | ●              | ●    | ●    | ●       |  Tympanometer (Oscilla TSM300, Taastrup, Denmark) and AudioConsole software (Version 3.3.4).                                                                  | Tympanometer in ear canal varies air pressure, vibrating the tympanic membrane to measure canal volume, middle ear pressure & compliance.                                                                               |                                                                                                                                                             |
| Speech reception threshold                                  | ●              | ●    | ●    | ●       |  Listening in Spatialised Noise – Sentences Test v1.104, <sup>52 53</sup> Phonak, NSW, Australia), laptop & headphones (Sennheiser HD215, Wedemark, Germany). | In a soundproof booth with headphones, participant repeats sentences at varying volume against fixed-volume background conversation. Adaptive test; computer algorithms pinpoints threshold.                            |                                                                                                                                                             |
| <b>Diet and food choices</b>                                |                |      |      |         |                                                                                                                                                                                                                                                |                                                                                                                                                                                                                         |                                                                                                                                                             |
| Food choices                                                | ●              | ●    |      |         |  Digital weight scales accurate to 1 gram (Breville, BSK500BSS).                                                                                              | Participant provided with a food box with prepacked snack food items to eat during a 15-minute break. Boxes on different days randomised to differ by box size and food amount. Uneaten food weighed at end of session. |                                                                                                                                                             |
| <b>Physical activity and time use</b>                       |                |      |      |         |                                                                                                                                                                                                                                                |                                                                                                                                                                                                                         |                                                                                                                                                             |
| Physical activity, sedentary behaviour, sleep <sup>54</sup> | ●              | ●    | ●    | ●       | ●                                                                                                                                                                                                                                              |  Wrist-worn accelerometer (GENEActiv Original, Cambs, UK) and self-report activity log.                                              | Tri-axial accelerometer on non-dominant wrist for 8 days. Participant records type of day (school, non-school), sleep times and activities with device off. |
| Time Use                                                    | ●              | ●    | ●    |         |                                                                                                                                                                                                                                                |  Multimedia Activity Recall for Children and Adults <sup>55-57</sup> program.                                                        | Activities recalled from the previous 24-48 hours, in increments of $\geq 5$ minutes. 2-3 days recalled, including one school and one non-school day.       |

| Construct & Measure                           | Main Mini Home |      |      | Station                                                                             | Equipment/instrument*                                                                                                                              | Data/sample collection protocol in brief                                                                                                                                                                                                                                                      |
|-----------------------------------------------|----------------|------|------|-------------------------------------------------------------------------------------|----------------------------------------------------------------------------------------------------------------------------------------------------|-----------------------------------------------------------------------------------------------------------------------------------------------------------------------------------------------------------------------------------------------------------------------------------------------|
|                                               | Ch P           | Ch P | Ch P |                                                                                     |                                                                                                                                                    |                                                                                                                                                                                                                                                                                               |
| <b>Strength and fitness</b>                   |                |      |      |                                                                                     |                                                                                                                                                    |                                                                                                                                                                                                                                                                                               |
| Eurofit broad jump <sup>58</sup>              | •              | •    | •    |    | Gym mat and measuring tape (Lufkin L610CME, Maryland, USA).                                                                                        | Participant jumps horizontally from a standing start with double-leg take off. After a practice jump, the distance of 3 jumps (measured in cm) are recorded.                                                                                                                                  |
| PWC170 VO <sub>2</sub> max test <sup>59</sup> | •              |      |      |    | Exercise bike (Monark 928G3, Manila, Philippines) and chest-worn heart rate monitor (Polar FT4, Smeaton Grange, Australia).                        | Warm up, then cycle at 60 RPM for 3x 2-min bouts. Resistance increases as per heart rate at end of each bout. Aerobic work capacity (VO <sub>2</sub> max) estimated.                                                                                                                          |
| <b>Vision</b>                                 |                |      |      |                                                                                     |                                                                                                                                                    |                                                                                                                                                                                                                                                                                               |
| Visual acuity                                 | •              | •    | •    |    | Computerised adaptive Freiburg Visual Acuity and Contrast Test <sup>60</sup> with Landolt C optotypes (FrACT 3.8.2, Breisgau, Germany).            | Participant identifies optotypes (shapes) from 3 meters. Right and left eyes tested separately, without glasses or contact lenses. Adaptive test; computer algorithms adjust size of optotypes presented to determine visual acuity. If visual acuity < 1.0, test repeated with pinhole lens. |
| <b>2D and 3D oral photography</b>             |                |      |      |                                                                                     |                                                                                                                                                    |                                                                                                                                                                                                                                                                                               |
| 2D and 3D oral photography                    | •              | •    | •    |   | <i>2D photography</i> - Digital SLR camera (Canon 70D, Tokyo, Japan).<br><i>3D photography</i> – 3-pod 3D camera (3dMD Trio system, Georgia, USA). | 2D photos of the dorsum of extruded tongue; then with lip retractors in place, teeth in occlusion and slightly apart with lower incisal edges visible. 3D photo teeth in occlusion with lip retractors in place.                                                                              |
| 3D facial photography                         | •              | •    |      |  | 3-pod 3D camera (3dMD Trio system, Georgia, USA).                                                                                                  | 3D photo of the face (neutral expression, hair pulled back in net to show hairline), ears and under chin.                                                                                                                                                                                     |
| <b>Written story</b>                          |                |      |      |                                                                                     |                                                                                                                                                    |                                                                                                                                                                                                                                                                                               |
| Handwriting, written language                 | •              | •    | •    |  | Pen, paper. Using protocol adapted from 1958 National Child Development Study (UK). <sup>61</sup>                                                  | Child writes a short story about what they think their life will be like when they are 25 years old.                                                                                                                                                                                          |

| Construct & Measure                  | Main Mini Home |      |      | Station                                                                             | Equipment/instrument*                                                                                                                                                                              | Data/sample collection protocol in brief                                                                                                                 |
|--------------------------------------|----------------|------|------|-------------------------------------------------------------------------------------|----------------------------------------------------------------------------------------------------------------------------------------------------------------------------------------------------|----------------------------------------------------------------------------------------------------------------------------------------------------------|
|                                      | Ch P           | Ch P | Ch P |                                                                                     |                                                                                                                                                                                                    |                                                                                                                                                          |
| <b>Wellbeing and quality of life</b> |                |      |      |                                                                                     |                                                                                                                                                                                                    |                                                                                                                                                          |
| General wellbeing                    | ●              | ●    | ●    |    | International Survey of Children's Wellbeing. <sup>62 63</sup><br>Pediatric Quality of Life (PedsQL) 4.0 General Wellbeing Scale. <sup>64</sup>                                                    | 6-item measure of subjective wellbeing.<br>7-item measure of quality of life and general wellbeing.                                                      |
| Health related quality of life       | ●              | ●    | ●    |    | PedsQL 4.0 Generic Core Scale. <sup>64</sup>                                                                                                                                                       | 23-item measure of physical and psychosocial health, yielding total, physical and psychosocial summary scores.                                           |
| Health related quality of life       | ●              | ●    | ●    |    | Assessment of quality of life 8D Scale. <sup>65</sup>                                                                                                                                              | 35-item measure of health-related quality of life. Overall utility score and dimension scores calculated.                                                |
| Health related quality of life       | ●              | ●    | ●    |    | Child Health Utility 9D. <sup>66</sup>                                                                                                                                                             | 9-item measure of health-related quality of life. Overall utility score calculated.                                                                      |
| <b>Pain</b>                          |                |      |      |                                                                                     |                                                                                                                                                                                                    |                                                                                                                                                          |
| Pain                                 | ●              | ●    | ●    |    | Pain severity questions <sup>67</sup> with pain manikin adapted for on-line administration. <sup>68</sup>                                                                                          | Asked about pain >1 day in past month; if yes, when started, and (children only) which body regions.                                                     |
| <b>Diet</b>                          |                |      |      |                                                                                     |                                                                                                                                                                                                    |                                                                                                                                                          |
| Diet                                 | ●              | ●    | ●    |   | Adapted National Secondary Students' Diet and Activity <sup>69</sup> questions, supplemented with adapted International Study of Childhood Obesity, Lifestyle and Environment <sup>70</sup> items. | 26-item brief food frequency survey of usual intake of a range of different foods including fruits and vegetables.                                       |
| <b>Allergy and eczema</b>            |                |      |      |                                                                                     |                                                                                                                                                                                                    |                                                                                                                                                          |
| Family allergies and pet exposure    | ●              | ●    | ●    |  | Allergy and pet exposure questions from the HealthNuts study; <sup>71 72</sup> parent-reported.                                                                                                    | Branched questionnaire items about child's siblings and parent's history of asthma, eczema, hay fever, latex/insect/food allergy, and the family's pets. |



| Construct & Measure                           | Main Mini Home |      |      | Station                                                                           | Equipment/instrument*                                                                                                                 | Data/sample collection protocol in brief                                                                                                                   |
|-----------------------------------------------|----------------|------|------|-----------------------------------------------------------------------------------|---------------------------------------------------------------------------------------------------------------------------------------|------------------------------------------------------------------------------------------------------------------------------------------------------------|
|                                               | Ch P           | Ch P | Ch P |                                                                                   |                                                                                                                                       |                                                                                                                                                            |
| <b>Colouring</b>                              |                |      |      |                                                                                   |                                                                                                                                       |                                                                                                                                                            |
| Natural skin, hair and eye colouring          | ● ●            | ● ●  | ● ●  |  | Questions adapted to self-report format from Paediatric Autoimmune Disease study <sup>73</sup> colour chart; parent-reported.         | 3-item measure of the natural skin, hair and eye colour of both the child and parent.                                                                      |
| <b>Medications and supplements</b>            |                |      |      |                                                                                   |                                                                                                                                       |                                                                                                                                                            |
| Current medications and supplements           | ●              | ●    | ●    |  | Medications and supplements questions modified from LSAC; <sup>74</sup> parent-reported.                                              | Branched questionnaire items about the child's medication and supplement use.                                                                              |
| <b>Health, welfare and community services</b> |                |      |      |                                                                                   |                                                                                                                                       |                                                                                                                                                            |
| Hospital admissions and health insurance      | ●              | ●    | ●    |  | Child lifetime hospitalisations, health care card and insurance coverage questions modified from LSAC; <sup>74</sup> parent-reported. | Branched questionnaire items about child's lifetime hospital admissions (including age, diagnosis), and concession card/private health insurance coverage. |
| Health service use                            | ●              | ●    | ●    |  | Use of services questions modified from LSAC; <sup>74</sup> parent-reported.                                                          | Branched questionnaire items about child's health service use and parent time spent on service use.                                                        |
| Community participation                       | ●              | ●    | ●    |  | Community activity use questions modified from LSAC; <sup>74</sup> parent-reported.                                                   | Branched questionnaire on community activity participation (eg team sports, music) in last year.                                                           |

| Construct & Measure       | Main | Mini | Home | Station | Equipment/instrument*                                                                                                                                                                                                                                                                          | Data/sample collection protocol in brief                                                                                                                                                                                                                                                                                                                                                                                                                                                                                                                                                                                                                                            |
|---------------------------|------|------|------|---------|------------------------------------------------------------------------------------------------------------------------------------------------------------------------------------------------------------------------------------------------------------------------------------------------|-------------------------------------------------------------------------------------------------------------------------------------------------------------------------------------------------------------------------------------------------------------------------------------------------------------------------------------------------------------------------------------------------------------------------------------------------------------------------------------------------------------------------------------------------------------------------------------------------------------------------------------------------------------------------------------|
|                           | Ch P | Ch P | Ch P |         |                                                                                                                                                                                                                                                                                                |                                                                                                                                                                                                                                                                                                                                                                                                                                                                                                                                                                                                                                                                                     |
| <b>Biological samples</b> |      |      |      |         |                                                                                                                                                                                                                                                                                                |                                                                                                                                                                                                                                                                                                                                                                                                                                                                                                                                                                                                                                                                                     |
| Venous blood              | ●    | ●    | ●    | ●       |  <p>S-Monovette vacutainers: 2.7ml K3 EDTA (05.1167.001), 9ml K3 EDTA (02.1066.001), 7.5ml Lithium Heparin liquid (01.1608.001), 9ml Serum Gel with Clotting Activator (02.1388.001), Sarstedt, Australia</p> | <p>Approximately 28mL blood from non-dominant arm of semi-reclining (45°), semi-fasted participants, processed into 0.5mL aliquots. Up to 6 EDTA plasma, 6 EDTA buffy coat, 6 LiH plasma, 6 LiH buffy coat (viable cells) and 6 serum per participant. In addition, <i>either</i> a whole blood clot <i>or</i> 3 whole blood aliquots and a dried blood spot (see next row). All serum, plasma and clot samples frozen directly at -80°C on site, while buffy coat aliquots were prepared in a freeze mix (10% fetal bovine serum + 10% DMSO in BME) and placed within CoolCells (Biotools, Australia) prior to control the rate of freezing at -80C to maximize cell viability</p> |
| Dried blood spot          | ●    | ●    | ●    | ●       |  <p>Lancet (1.6mm (#85.1018) or 1.8mm (#85.1016) depth, Sarstedt Australia), Guthrie card.</p>                                                                                                                | <p>Card used for newborn screening is blotted with four drops of blood, collected via either a finger prick or pipetting a small amount of the venous whole blood sample. Stored at room temperature.</p>                                                                                                                                                                                                                                                                                                                                                                                                                                                                           |
| Urine                     | ●    | ●    | ●    | ●       |  <p>70mL screw cap polypropylene sterile pot (#75.9922.731, Sarstedt, Australia)</p>                                                                                                                         | <p>Participant collects random urine sample into 30mL sterile urine pot, pipetted into 12x 0.7mL aliquots. Stored at -80°C on site.</p>                                                                                                                                                                                                                                                                                                                                                                                                                                                                                                                                             |
| Saliva                    | ●    | ●    | ●    | ●       |  <p>50mL polypropylene sterile tube (#FAL352070, Falcon, Corning Inc., Corning, NY, USA)</p>                                                                                                                | <p>Five minute passive saliva drool into sterile tube. Sample weighed, then pipetted into 6x 0.5mL aliquots. Stored at -80°C on site.</p>                                                                                                                                                                                                                                                                                                                                                                                                                                                                                                                                           |
| Buccal swab               | ○    | ○    | ○    | ○       |  <p>Buccal swab (Oracollect DNA OCR-100, The Hague, Netherlands. If not available, FloqSwab COPAN Flock Technologies, Brescia, Italy was used).</p>                                                         | <p>Participant rubs swab over gums/inner cheeks. <i>OCR-100</i>: Immerses swab in the preserving liquid, seals tube. Aliquoted into 2 x 0.5mL aliquots. <i>FloqSwab</i>: Seals swab in air-tight container. Stored at room temperature then -80°C.</p>                                                                                                                                                                                                                                                                                                                                                                                                                              |

| Construct & Measure | Main Mini Home |      |      | Station                                                                           | Equipment/instrument*                       | Data/sample collection protocol in brief                                                                                                                                                                                              |
|---------------------|----------------|------|------|-----------------------------------------------------------------------------------|---------------------------------------------|---------------------------------------------------------------------------------------------------------------------------------------------------------------------------------------------------------------------------------------|
|                     | Ch P           | Ch P | Ch P |                                                                                   |                                             |                                                                                                                                                                                                                                       |
| Hair                | ● ●            | ● ●  |      |  | String, aluminium foil, envelope, scissors. | Two locks of hair (4mm in diameter) tied with string and cut close to the scalp from the occipital area under the crown. Hair wrapped in aluminium foil (scalp end identified) and stored in a barcoded envelope at room temperature. |
| Toenails            | ●              | ●    | ●    |  | Scissors, envelope.                         | Clean toenails >3mm trimmed from right big toe (if not available, left big toenail or fingernails) and stored at room temperature in barcoded envelope.                                                                               |

Questionnaire measures are self-reported, unless indicated they were parent-reported. \*All questionnaire items administered by iPad or laptop, except the pain manikin, which was completed on paper at home visits. For brevity, iPad or laptop is not listed for every questionnaire item. Open circles indicate sample collected from non-attending parent.

Ch: Data/sample collected relates to child participant; P: Data/sample collected relates to parent participant; BP: Blood pressure; Ca: California, USA; FrACT: Freiburg Visual Acuity and Contrast Test; kHz: kilohertz; LiH: Lithium Heparin; LSAC: Longitudinal Study of Australian Children; PedsQL: Pediatric Quality of Life; NaSSDA: National Secondary Students' Diet and Activity; NIH: National Institutes of Health; UK: United Kingdom; USA: United States of America; VO<sub>2</sub>max: Maximum volume of oxygen consumed; 2D: Two dimensional; 3D: Three dimensional.

For peer review only

1  
2  
3 *Assessment sequence:* Participants completed the assessments in a standard sequence (Figure  
4 2), designed to minimise interdependencies between measures. Bronchodilator administration  
5 (which may alter cardiovascular parameters) followed cardiovascular measures, and the snack  
6 station was scheduled after saliva and semi-fasting blood collection, but before exercise.  
7  
8  
9

10 The visit started with the parent providing consent, while the child wrote their story at *Life at*  
11 *25*. At Assessment Centres, participants were then given a carry bag containing an iPad to  
12 complete the questionnaire, water bottle and urine sample collection kit, and a lanyard showing  
13 the order of data collection stations to visit. Participants advanced every 15 minutes from one  
14 station to the next (except child *Lung Fun* which was 30 minutes duration), following the  
15 previous participant in their journey around the Centre. Most stations were conducted one-on-  
16 one, but in some the study child and attending parent were both present (*CheckPoint Check-in,*  
17 *Measure Up, Tooth Booth, Bone Zone,* child *Young Bloods* and *Endgames*, see figure 2), and  
18 two children could be present at any one time for *Life at 25, Jumping Beans* and *Bike Hike*.  
19  
20  
21  
22  
23  
24  
25

26 Prior to the last station *Endgames*, participants could take extra time to complete their  
27 questionnaire or provide a urine sample. At *Endgames*, a staff member explained the contents  
28 of a take-home pack. The child and parent were fitted with their wrist-worn accelerometers,  
29 and a follow-up phone interview was booked/confirmed for the child to complete additional  
30 time-use diaries.<sup>55</sup> The take-home pack also included a reply-paid express post satchel, child  
31 and parent activity log cards, non-attending parent buccal sample collection kit (as applicable),  
32 summary of health results collected on the day, and thank you gifts and token reimbursement  
33 for travel.  
34  
35  
36  
37  
38  
39  
40

41 Home visit consent, assessments and take-home packs used the same protocol as the  
42 Assessment Centres and included at least one measure from every major health domain;  
43 however, some assessments were omitted (table 1). The home visit sequence generally  
44 mirrored the centre flow, with minor adjustments to allow one staff member to assess both  
45 child and parent within the available time. Dried blood spot, urine and buccal swabs were  
46 obtained, and urine processing was delayed when local laboratory facilities were not  
47 available.<sup>75</sup>  
48  
49  
50  
51  
52

53 Research assistants and students were trained by experts, and real-time quality checks were  
54 undertaken throughout the data collection period. These checks included data range checks  
55 integrated into the data entry forms; dynamic data completeness checks for each participant  
56 during and at the end of their visit, with gaps redressed by a dedicated staff member before  
57  
58  
59  
60

1  
2  
3 departure; weekly completeness checks for the study overall and ongoing process  
4 modifications to address all causes of missing data identified; random visual checks of the data  
5 to identify and fix any developing departures from protocol; and ongoing staff training, time  
6 trials and testing knowledge of Standard Operating Procedures. Inter- and intra-rater reliability  
7 for data transcription and scoring was calculated, where relevant and possible. Data collection  
8 reliability was not available as the participant flow precluded repeated measures of same  
9 individual.

10  
11  
12 **Measures:** Measures and biological samples collected are briefly described in Table 1. Other  
13 papers of this BMJ Open Special Issue<sup>12-25</sup> provide greater detail, epidemiological description  
14 and parent-concordance for many of these; and their rationale has been previously published.<sup>76</sup>  
15 Data were collected electronically via specialist medical equipment/software or, where not  
16 possible, staff entered data into REDCap (Research Electronic Data Collection tool).<sup>77</sup>  
17 REDCap was also used to administer the child and parent questionnaires on iPads. Data  
18 collection and data processing Standing Operating Procedures are available (see  
19 <http://www.checkpoint-lsac.mcri.edu.au> measures were offered to both children and parents;  
20 however, the parent flow omitted the exercise stations (*Bike Hike* and *Jumping Beans*), time-  
21 use diary, post-bronchodilator spirometry and toenail samples. Instead, parents completed a  
22 more detailed questionnaire about their child's healthcare (including hospitalisations),  
23 medications and use of community services; and their own health-related quality of life.

24  
25  
26 *Biospecimen collection and repository:* Biospecimens collected are described in table 1.  
27 Samples (except buccal swabs) were processed within hours in an on-site laboratory set up at  
28 all Main Assessment and most Mini Assessment Centres. Blood and saliva samples were  
29 generally processed within an hour (blood: range 1 minute to 3.8 hours, median 53 minutes;  
30 saliva: range 1 minute to 5.7 hours, median 44 minutes). Urine sample processing was delayed  
31 if collected away from a laboratory; 56% of urine samples processed within three hours (range  
32 1 minute to 9 days, median 71 minutes).<sup>75</sup> At the completion of each Assessment Centre, a  
33 single batch of all frozen samples were shipped on dry ice to the Melbourne Children's  
34 Bioresource Centre (at the MCRI) for long term storage at -80°C (except buffy coat aliquots  
35 are stored in vapour phase liquid nitrogen). A temperature data logger was included in each  
36 shipment to confirm optimal temperature throughout. All other samples, kept at room  
37 temperature, were transported at the same time. All samples are stored in a de-identified  
38 manner and are only identified for extraction from the repository. Newly derived biospecimen  
39 data is linked to the participant by an external staff member using a linkage key. . Samples  
40  
41  
42  
43  
44  
45  
46  
47  
48  
49  
50  
51  
52  
53  
54  
55  
56  
57  
58  
59  
60

1  
2  
3 were tracked using QR code scanners and FreezerPro Enterprise (RuRo, Maryland, USA)  
4 software. Frozen samples are stored in boxes of 96 aliquots, and aliquot picking is undertaken  
5 by hand (i.e. not automated by robot). As of January 2018, completed biomarker analyses for  
6 all parents and children with relevant samples were serum metabolomics  
7 (<http://www.nightingalehealth.com>),<sup>22 78 79</sup> urinary albumin-creatinine ratio (ACR)<sup>19</sup> and  
8 telomere length,<sup>16</sup> genotyping and micronutrient analyses were under way; and funding had  
9 been secured for one-carbon pathway analyses.

15  
16 **Data access:** The LSAC data are available to researchers under licence, and from early 2018  
17 will include the first tranche of completed parent and child CheckPoint data. The LSAC website  
18 explains access to these data

19  
20  
21 (<http://www.growingupinaustralia.gov.au/data/dataaccessmenu.html>).

22  
23 It is intended that all further CheckPoint data and biospecimens will also be accessible to all  
24 researchers. Applications to undertake new data extraction and biosamples, or to collaborate  
25 with CheckPoint investigators on in-train funded new data, are considered by CheckPoint's  
26 Data/Biospecimens Access Committees (see <http://www.checkpoint-lsac.mcri.edu.au>).

27  
28  
29  
30 **Statistical analyses:** Sample characteristics, sample size and consent rates were described as  
31 counts, proportions, means and standard deviations. Baseline demographic characteristics of  
32 LSAC families who did and did not participate in CheckPoint were compared to consider the  
33 representativeness of the maintained CheckPoint sample in relation to preceding LSAC waves.

34  
35  
36  
37 **Survey weights:** CheckPoint survey weights were created<sup>80</sup> using similar methods to those  
38 used for previous waves of LSAC, and are provided in the CheckPoint dataset. These methods  
39 account for the selection probability of each child to establish the target design sample, initial  
40 non-response to the baseline survey and subsequent loss to follow-up. LSAC and CheckPoint  
41 survey weights have been estimated to reflect the likelihood of participation from wave to wave  
42 within the limits of the information available from study measures.

43  
44  
45  
46  
47  
48 Applying LSAC survey weights produces analyses that will be as representative as possible for  
49 all Australian children born in 2004 and their parents. CheckPoint differs in that, for the  
50 majority of measures, only the attending parent (usually the mother) was assessed, and thus  
51 weighted analyses of the parent data are more difficult to interpret because the weighting does  
52 not estimate a representative sample of all parents.

## RESULTS

Below we summarise the vanguard participants' evaluation of the CheckPoint module. We then describe B cohort recruitment and reasons for non-participation in the CheckPoint module, and demographic characteristics of CheckPoint participants and non-responders. Lastly, we summarise data completeness for each measure, and biospecimen collection and consent rates.

In 2014, ahead of the main data collection wave, the vanguard families reported high levels of enjoying the CheckPoint visit (mean out of 10: child 8.8, parent 8.2), recommending it to others (child 7.7, parent 9.0) and valuing the child health report provided on the day (child 7.7, parent 8.2). Children and parents were also asked if participating in the CheckPoint had changed how they feel about being in the LSAC study (from 1 'Like it much less' to 10 'Like it much more'); on average, participants liked LSAC more after their CheckPoint visit (mean: child 8.4, parents 7.7).

The CheckPoint sample size was fixed by LSAC retention to wave 6. Of a total of 3764 families who participated in wave 6, 3513 (93%) consented to CheckPoint contact, 3152 (84%) provided valid contact details and were invited into CheckPoint, and 1875 (50%) participated (figure 1). One family withdrew consent after assessment. Thus, the CheckPoint analytic sample included 1874 parent-child pairs, plus 1051 non-attending resident parents.

Most non-participation (60%) was due to inability to attend or reschedule a visit during the short period CheckPoint was in each location. Far fewer families declined (18%).

Demographic characteristics of the CheckPoint sample and non-responders are summarised in table 2. Within the CheckPoint sample, 99% of attending parents and all non-attending participants were a biological parent of the study child. There was an equal distribution of boys and girls. However, the sample of attending parents was not equally or randomly comprised of mothers and fathers, since each family decided which parent or guardian attended and most (88%) attending parents were mothers. Almost 90% of attending parents were nominated 'Parent 1' (ie the parent who knows the child best and completes the main questionnaire) in previous LSAC waves. The majority of CheckPoint families lived in major cities, with a similar distribution across the states and territories to the Australian population. Larger proportions of families were in the higher socio-economic position quintiles than in the Australian population. Detailed comparisons of the LSAC sample to the Australian population have been published previously.<sup>11 81</sup>

1  
2  
3 Compared to B cohort families who did not take part in the CheckPoint, table 2 shows that  
4 participating families at baseline (2004) reported higher socioeconomic position and parental  
5 education, and lower likelihood of non-English speaking or Indigenous backgrounds.  
6  
7  
8  
9  
10  
11  
12  
13  
14  
15  
16  
17  
18  
19  
20  
21  
22  
23  
24  
25  
26  
27  
28  
29  
30  
31  
32  
33  
34  
35  
36  
37  
38  
39  
40  
41  
42  
43  
44  
45  
46  
47  
48  
49  
50  
51  
52  
53  
54  
55  
56  
57  
58  
59  
60

For peer review only



**Table 2. Child Health CheckPoint sample characteristics**

| Characteristic                                                                           | Sample characteristics<br>at CheckPoint (2015-<br>16)* n=1874 families | Baseline characteristics (2004) <sup>†</sup> |                                      |
|------------------------------------------------------------------------------------------|------------------------------------------------------------------------|----------------------------------------------|--------------------------------------|
|                                                                                          |                                                                        | In CheckPoint<br>n=1874 families             | Not in CheckPoint<br>n=3233 families |
| Values are %, unless indicated                                                           |                                                                        |                                              |                                      |
| Child age in years, mean (SD)                                                            | 12.4 (0.4)                                                             | 0.8 (0.2)                                    | 0.8 (0.2)                            |
| Parent age in years, mean (SD)                                                           | 44.4 (5.2)                                                             | 32.1 (4.9)                                   | 30.4 (5.7)                           |
| Female child                                                                             | 49.0                                                                   | 49.0                                         | 48.9                                 |
| Female parent                                                                            | 87.7                                                                   | 98.7                                         | 98.5                                 |
| Child accompanied by biological parent                                                   | 98.9                                                                   | 99.7                                         | 99.7                                 |
| Child has Indigenous background <sup>§</sup>                                             | 2.0                                                                    | 2.0                                          | 6.0                                  |
| Parent born in Australia <sup>‡</sup>                                                    | 79.0                                                                   | 79.3                                         | 81.2                                 |
| Parent home language not English <sup>‡</sup>                                            | 10.8                                                                   | 11.2                                         | 16.3                                 |
| Area of residence <sup>1</sup>                                                           |                                                                        |                                              |                                      |
| Major city                                                                               | 70.3                                                                   | 70.5                                         | 64.0                                 |
| Inner regional                                                                           | 20.3                                                                   | 18.0                                         | 20.6                                 |
| Outer regional                                                                           | 8.7                                                                    | 9.9                                          | 12.8                                 |
| Remote                                                                                   | 0.8                                                                    | 1.6                                          | 2.6                                  |
| Australian state/territory of residence                                                  |                                                                        |                                              |                                      |
| Australian Capital Territory                                                             | 2.8                                                                    | 2.9                                          | 1.6                                  |
| Northern Territory                                                                       | 1.6                                                                    | 2.4                                          | 1.3                                  |
| New South Wales                                                                          | 28.6                                                                   | 29.9                                         | 32.6                                 |
| Queensland                                                                               | 21.5                                                                   | 20.0                                         | 20.1                                 |
| South Australia                                                                          | 8.0                                                                    | 7.5                                          | 6.4                                  |
| Tasmania                                                                                 | 3.3                                                                    | 3.2                                          | 1.6                                  |
| Victoria                                                                                 | 22.5                                                                   | 22.2                                         | 25.8                                 |
| Western Australia                                                                        | 11.8                                                                   | 11.8                                         | 9.7                                  |
| Socioeconomic position <sup>2</sup> , mean (SD) <sup>‡</sup>                             | 0.2 (1.0)                                                              | 0.3 (1.0)                                    | -0.2 (1.0)                           |
| Neighbourhood Disadvantage Index <sup>3</sup> ,<br>mean (SD) and % in national quintiles | 1023 (60)                                                              | 1019 (61)                                    | 1003 (59)                            |
| 1 (least disadvantaged quintile)                                                         | 34.8                                                                   | 29.0                                         | 18.9                                 |
| 2                                                                                        | 23.4                                                                   | 20.3                                         | 19.8                                 |
| 3                                                                                        | 18.8                                                                   | 19.3                                         | 21.6                                 |
| 4                                                                                        | 14.8                                                                   | 19.8                                         | 21.7                                 |
| 5 (most disadvantaged quintile)                                                          | 8.2                                                                    | 11.6                                         | 18.1                                 |
| Parent's highest level of education <sup>‡</sup>                                         |                                                                        |                                              |                                      |
| Did not complete high school                                                             | 20.1                                                                   | 21.4                                         | 39.0                                 |
| High school                                                                              | 44.4                                                                   | 42.3                                         | 39.9                                 |
| Undergraduate degree (Bachelor)                                                          | 23.6                                                                   | 26.6                                         | 15.5                                 |
| Postgraduate degree                                                                      | 11.9                                                                   | 9.7                                          | 5.7                                  |
| Attending parent's employment status <sup>‡</sup>                                        |                                                                        |                                              |                                      |
| Working full-time (≥30<br>hours/week)                                                    | 46.9                                                                   | 31.8                                         | 22.4                                 |
| Working part-time                                                                        | 37.4                                                                   | 2.7                                          | 1.6                                  |
| Not currently working                                                                    | 15.7                                                                   | 65.5                                         | 76.0                                 |
| Parent has a spouse/partner                                                              | 88.1                                                                   | 95.7                                         | 91.3                                 |

\*Data collected in CheckPoint 2015-16 wave, except data indicated as collected at <sup>‡</sup>wave 6 (2014) or <sup>§</sup>wave 1 (2004). Parent data = CheckPoint 'attending parent'. <sup>†</sup>Data collected in wave 1 (2004). Parent data = 'Parent 1'. CheckPoint attending parent is the wave 1 Parent 1 for 89.3% of families. <sup>1</sup>Australian Bureau of Statistics (ABS) Remoteness Area Code (<sup>ref 82</sup>). <sup>2</sup>LSAC-derived Family socioeconomic position z-score (<sup>ref 83</sup>). Higher scores = greater advantage. <sup>3</sup>ABS 2011 Socio-Economic Indexes for Areas Index of Relative Socioeconomic Disadvantage (<sup>ref 84</sup>)

1 Data completeness for each measure was high (Table 3) at >92% of participants eligible for  
2 each measure, except for accelerometry and child pain. A shortage of accelerometers at certain  
3 points over the data collection period meant physical activity data were available for 74% of  
4 children and 77% of parents. Initial problems with the branching architecture of questions<sup>75</sup>  
5 meant pain data were available for only 85% of children (but 99% of parents). The most  
6 common reasons for missing data were the measure not being included in all visit types,  
7 followed by equipment unavailability, participant refusal and erroneous data removed in the  
8 preparation of the dataset.<sup>75</sup> Data from all of the measures listed in Table 3 will be included in  
9 the first CheckPoint data release in early 2018, except the handwritten story, and retinal, oral  
10 and facial photographs.  
11  
12  
13  
14  
15  
16  
17  
18  
19  
20  
21  
22  
23  
24  
25  
26  
27  
28  
29  
30  
31  
32  
33  
34  
35  
36  
37  
38  
39  
40  
41  
42  
43  
44  
45  
46  
47  
48  
49  
50  
51  
52  
53  
54  
55  
56  
57  
58  
59  
60

**Table 3. Sample size by measure and participant group**

| Construct                   | Measure                                         | Children    | Parents     |                   | Parent-child pairs |                   | 2018 data release |
|-----------------------------|-------------------------------------------------|-------------|-------------|-------------------|--------------------|-------------------|-------------------|
|                             |                                                 | n=1874      | All n=1874  | Biological n=1854 | All n=1874         | Biological n=1854 |                   |
| Anthropometry               | Height, weight                                  | 1873 (99.9) | 1865 (99.5) | 1845 (98.5)       | 1864 (99.5)        | 1844 (98.4)       | ●                 |
|                             | Body composition*                               | 1859 (99.2) | 1844 (98.4) | 1824 (97.3)       | 1837 (98.0)        | 1817 (97.0)       | ●                 |
| Pubertal status             | Puberty Development, Sexual Maturity Scales     | 1807 (96.4) | -           | -                 | -                  | -                 | ●                 |
|                             | Menstruation <sup>†</sup>                       | 844 (45.0)  | 1610 (85.9) | 1598 (85.3)       | 740 (39.5)         | 733 (39.1)        | ●                 |
|                             | Modified Comprehensive Acne Severity Scale      | 1762 (94.0) | -           | -                 | -                  | -                 | ●                 |
| Bone, muscle                | Peripheral quantitative computed tomography     | 1271 (67.8) | 1250 (66.7) | 1240 (66.2)       | 1231 (65.7)        | 1222 (65.2)       | ●                 |
| Cardiovascular              | Carotid intima-media thickness                  | 1489 (79.5) | 1476 (78.8) | 1463 (78.1)       | 1462 (78.0)        | 1449 (77.3)       | ●                 |
|                             | Pulse wave velocity, pulse wave analysis        | 1836 (98.0) | 1790 (95.5) | 1773 (94.6)       | 1769 (94.4)        | 1752 (93.5)       | ●                 |
|                             | Blood pressure                                  | 1777 (94.8) | 1749 (93.3) | 1732 (92.4)       | 1682 (89.8)        | 1666 (88.9)       | ●                 |
|                             | Microvascular structure (retinal photography)   | 1307 (69.7) | 1317 (70.3) | 1307 (69.7)       | 1292 (68.9)        | 1282 (68.4)       |                   |
| Respiratory                 | Spirometry                                      | 1759 (93.9) | 1774 (94.7) | 1754 (93.6)       | 1688 (90.1)        | 1668 (89.0)       | ●                 |
| Language                    | Expressive & receptive language (Recall' Sent.) | 1441 (76.9) | 1446 (77.2) | 1433 (76.5)       | 1415 (75.5)        | 1402 (74.8)       | ●                 |
|                             | Receptive vocabulary (NPVT)                     | 1443 (77.0) | 1457 (77.7) | 1444 (77.1)       | 1401 (74.8)        | 1389 (74.1)       | ●                 |
| Hearing                     | Pure tone audiometry                            | 1488 (79.4) | 1493 (79.7) | 1480 (79.0)       | 1480 (79.0)        | 1467 (78.3)       | ●                 |
|                             | Tympanometry                                    | 1099 (58.6) | 1101 (58.8) | 1092 (58.3)       | 1065 (56.8)        | 1056 (56.4)       | ●                 |
|                             | Speech reception threshold (LiSN-S)             | 1483 (79.1) | 1482 (79.1) | 1469 (78.4)       | 1466 (78.2)        | 1453 (77.5)       | ●                 |
| Diet and food choices       | National Secondary Students' Diet & Activity    | 1846 (98.5) | 1862 (99.4) | 1846 (98.5)       | 1837 (98.0)        | 1821 (97.2)       | ●                 |
|                             | Snack observation                               | 1294 (69.1) | 1246 (66.5) | 1235 (65.9)       | 1205 (64.3)        | 1195 (63.8)       | ●                 |
| Physical activity, time use | Accelerometry                                   | 1382 (73.7) | 1440 (76.8) | 1424 (76.0)       | 1223 (65.3)        | 1209 (64.5)       | ●                 |
|                             | Time-use diary (MARCA)                          | 1830 (97.7) | -           | -                 | -                  | -                 | ●                 |
| Strength and fitness        | Eurofit broad jump                              | 1771 (94.5) | -           | -                 | -                  | -                 | ●                 |
|                             | PWC170 VO <sub>2</sub> max test                 | 1301 (69.4) | -           | -                 | -                  | -                 | ●                 |
| Vision                      | Freiburg Visual Acuity Test                     | 1494 (79.7) | 1491 (79.6) | 1478 (78.9)       | 1481 (79.0)        | 1468 (78.3)       | ●                 |
| 2D and 3D photography       | 2D and 3D photos of teeth and tongue            | 1486 (79.3) | 1480 (79.)  | 1467 (78.3)       | 1478 (78.9)        | 1465 (78.2)       |                   |
|                             | 3D photos of face                               | 1331 (71.0) | 1316 (70.2) | 1305 (69.6)       | 1313 (70.1)        | 1302 (69.5)       |                   |

| Construct                              | Measure                                               | Children     | Parents     |                   | Parent-child pairs |                   | 2018 data release |
|----------------------------------------|-------------------------------------------------------|--------------|-------------|-------------------|--------------------|-------------------|-------------------|
|                                        |                                                       | n=1874       | All n=1874  | Biological n=1854 | All n=1874         | Biological n=1854 |                   |
| Handwriting, written language          | Handwritten story about life at age 25                | 1811 (96.6)  | -           | -                 | -                  | -                 |                   |
| General wellbeing                      | ISCW & PedsQL General Wellbeing                       | 1860 (99.3)  | -           | -                 | -                  | -                 | ●                 |
| Health related quality of life         | PedsQL, Child Health Utility 9D, AQoL-8D <sup>†</sup> | 1854 (98.9)  | 1871 (99.8) | 1853 (98.9)       | 1854 (98.9)        | 1836 (98.0)       | ●                 |
| Pain                                   | Pain <sup>§</sup>                                     | 1586 (84.6)  | 1859 (99.2) | 1843 (98.3)       | 1576 (84.1)        | 1562 (83.4)       | ●                 |
| Natural colouring                      | Skin, hair and eye colour                             | 1859 (99.2)  | 1859 (99.2) | 1843 (98.3)       | 1859 (99.2)        | 1843 (98.3)       | ●                 |
| Medications, supplements               | Current medications and supplements                   | 1853 (98.9)  | -           | -                 | -                  | -                 | ●                 |
| Health, welfare and community services | Health service use, hospital admissions               | 1874 (100.0) | -           | -                 | -                  | -                 | ●                 |
| community services                     | Community participation and services                  | 1822 (97.2)  | -           | -                 | -                  | -                 | ●                 |
| Serum metabolites                      | NMR metabolomics platform                             | 1180 (63.0)  | 1325 (70.7) | 1313 (70.1)       | 1139 (60.8)        | 1133 (60.5)       | ●                 |
| Renal function                         | Urinary albumin and creatinine concentration          | 1579 (84.3)  | 1671 (89.2) | 1653 (88.2)       | 1535 (81.9)        | 1518 (81.0)       | ●                 |
| Biological aging                       | Telomere length                                       | 1206 (64.4)  | 1343 (71.7) | 1330 (71.0)       | 1151 (61.4)        | 1143 (61.0)       |                   |

Value are n (%) of participants or pairs with data available. These may differ slightly from sample sizes presented in other CheckPoint papers in this BMJ Open Special Issue, where authors have restricted analyses to participants meeting specified levels of data quality or completeness. 'All parents' and 'all parent-child pairs' include biological and non-biological (eg step-, adoptive or biological relatives other than mother or father) parent-child relationships. Parent-child pairs include families where both the child *and* parent have data available for that measure. \*381 children and 344 parents have body fat % measured using a 2-limb BIA scale at home visits; the remainder have detailed body composition measured using a 4-limb BIA scale. <sup>†</sup>Girls were asked 'has menstruation started' and 'are you menstruating today?' and women were asked 'are you menstruating today?' <sup>\*</sup>Children completed the PedsQL, parents completed the AQoL-8D, and both children and parents completed the Child Health Utility 9D. <sup>§</sup>Parents completed a subset of the pain questions completed by children.

AQoL-8D: Assessment of Quality of Life 8D; BIA: Bioelectrical impedance analysis; ISCW: International Survey of Children's Wellbeing; LiSN-S: Listening in Spatialised Noise – Sentence Test; MARCA: Multimedia Activity Recall for Children and Adults; NMR: nuclear magnetic resonance; NPVT: National Institute of Health Picture Vocabulary test; PedsQL: Pediatric Quality of Life.

1  
2  
3 Biospecimen collection rates were also high (table 4) for blood (venous or finger prick, 91%  
4 of children and 96% of attending parents) and other biological samples (>70%). Most (95%)  
5 of children and parents had either a saliva (collected when laboratory facilities were  
6 available) or buccal swab (stable for 60 days before processing) sample. Consent was  
7 obtained for  $\geq 97\%$  of samples collected to share with other researchers and undertake genetic  
8 analyses, and  $\geq 94\%$  of participants to access child perinatal birth data and child neonatal  
9 blood spots, and to share child and parent digital images. Buccal samples were also collected  
10 from 1051 non-attending parents (of whom 94% consented to share, and 98% to undertake  
11 genetic analyses). In total, 1021 (55%) families have at least one sample available for the  
12 child and both biological parents.  
13  
14  
15  
16  
17  
18  
19  
20  
21  
22  
23  
24  
25  
26  
27  
28  
29  
30  
31  
32  
33  
34  
35  
36  
37  
38  
39  
40  
41  
42  
43  
44  
45  
46  
47  
48  
49  
50  
51  
52  
53  
54  
55  
56  
57  
58  
59  
60

**Table 4. Data/sample collection rates and consent for use of images/sample**

| Measure or sample       | Children n=1874        |                  |                             | Attending Parents n=1874 |                  |                             |
|-------------------------|------------------------|------------------|-----------------------------|--------------------------|------------------|-----------------------------|
|                         | Data/ sample collected | Consent to share | Consent to genetic analyses | Data/ sample collected   | Consent to share | Consent to genetic analyses |
| Digital images (photos) |                        |                  |                             |                          |                  |                             |
| 2D and 3D teeth         | 1486 (79.3)            | 1398 (94.1)      | -                           | 1480 (79.)               | 1397 (94.4)      | -                           |
| 3D face                 | 1331 (71.0)            | 1251 (94.0)      | -                           | 1316 (70.2)              | 1241 (94.3)      | -                           |
| Retinal                 | 1307 (69.7)            | 1229 (94.0)      | -                           | 1317 (70.3)              | 1240 (94.2)      | -                           |
| Perinatal birth data*   | 1838 (98.1)            | -                | -                           | -                        | -                | -                           |
| Newborn Guthrie card*   | 1810 (96.6)            | 1760 (97.2)      | 1775 (98.1)                 | -                        | -                | -                           |
| Blood                   | 1701 (90.8)            | 1646 (96.8)      | 1673 (98.4)                 | 1792 (95.6)              | 1731 (96.6)      | 1762 (98.3)                 |
| Plasma                  | 1230 (65.6)            | 1196 (97.2)      | 1211 (98.5)                 | 1371 (73.2)              | 1331 (97.1)      | 1353 (98.7)                 |
| Serum                   | 1192 (63.6)            | 1160 (97.3)      | 1174 (98.5)                 | 1336 (71.3)              | 1297 (97.1)      | 1319 (98.7)                 |
| Whole blood/ clot       | 1223 (65.3)            | 1189 (97.2)      | 1204 (98.4)                 | 1358 (72.5)              | 1318 (97.1)      | 1340 (98.7)                 |
| Guthrie card            | 1424 (76.0)            | 1382 (97.1)      | 1405 (98.7)                 | 1468 (78.3)              | 1421 (96.8)      | 1446 (98.5)                 |
| Urine                   | 1595 (85.1)            | 1548 (97.1)      | 1571 (98.5)                 | 1686 (90.)               | 1637 (97.1)      | 1662 (98.6)                 |
| Saliva                  | 1375 (73.4)            | 1327 (96.5)      | 1350 (98.2)                 | 1392 (74.3)              | 1347 (96.8)      | 1370 (98.4)                 |
| Buccal                  | 398 (21.2)             | 385 (96.7)       | 392 (98.5)                  | 390 (20.8)               | 378 (96.9)       | 383 (98.2)                  |
| Hair                    | 1390 (74.2)            | 1343 (96.6)      | 1365 (98.2)                 | 1439 (76.8)              | 1397 (97.1)      | 1418 (98.5)                 |
| Toenail                 | 1586 (84.6)            | 1534 (96.7)      | 1561 (98.4)                 | -                        | -                | -                           |

Values are n (%). Data/sample collected % is the proportion of the sample (x/1874). Consent % is the proportion of participants who provided data/sample(s)

\*Access to these data has been consented to by participants, but not yet attempted by the study team as of October 2017.

## DISCUSSION

**Principal findings:** The Child Health CheckPoint provides a paired cross-generational snapshot of the health of 11-12 year old Australian children and their parents who took part in the CheckPoint assessment (mostly mothers). Data completeness was high amongst the nearly 2000 families who participated. The utility of the data and biospecimens is further enhanced by near-universal consent for genetic analysis and sharing with other researchers. Enriching LSAC's life-long environmental data with CheckPoint's biological data strengthens the utility of LSAC to address important questions on how NCDs develop phenotypically before overt disease is evident, and shed light on the underlying dimensionality of health at different life stages.

Key logistic challenges faced by the CheckPoint were its short time window both to plan and conduct (a fixed 12 months from February 2015), the sheer size of Australia (approximately the same as continental USA), and the limited funding allowing for only one set of heavy equipment and thus curtailing the period during which the CheckPoint was available to participants in each city.

**Strengths and limitations:** Strengths of LSAC include its large population-based sample, data linkage, historical repeated measures, and open data access. Strengths of the CheckPoint module include the sophistication of its health assessments, and the cross-generational child-parent assessments paired on time of assessment, protocols and equipment. Utility of the CheckPoint data is strengthened by its timing relative to child age (i.e. adolescence onset) and LSAC duration (i.e. ten years of data already available); and its timely release of curated data to researchers (within two years of data collection), with more to come as data scoring and biomarker analyses are completed. The CheckPoint is led by diverse and specialty-based researchers, who continue to develop multi-system hypotheses and discovery research. We have prioritized harmonisation of methods with other internationally-significant cohorts (eg utilisation of the Nightingale metabolomics and Illumina Global Screening Array genotyping platforms). Finally, the CheckPoint module was enjoyable for participants, and its impact on participant retention in future LSAC waves will be examined.

The sample reflects the broader Australian population in many attributes, including state/territory of residence. A limitation (that can be partly addressed by using survey weights<sup>80</sup>) is that families were more likely to live in major cities and have a higher socioeconomic status than non-participants and Australians in general. The limitation that the majority of the parent

1  
2  
3 sample are mothers reflects the design of the study and cannot be addressed using survey  
4 weights so should be considered and noted in all analyses of parents. Due to sample attrition,  
5 the final number of parent-child dyads was only around 1900, limiting power for rare exposures  
6 and outcomes; this is partly offset by LSAC's common exposures, and CheckPoint's focus on  
7 continuous outcome measures. Almost all measures were collected from only one of the child's  
8 parents, although family studies will be possible for the 55% of families for whom we collected  
9 a DNA sample from both parents. A further potential limitation is that LSAC does not have  
10 prospective prenatal data on the children, although it does includes prospective data from very  
11 early life (child age at wave 1 spanned 3-19 months) and permission to link to birth data.

12  
13  
14  
15  
16  
17  
18  
19 **Implications and future research:** The wealth and depth of longitudinal LSAC data available  
20 gives important context to CheckPoint's health and biomarker data. To commence a brand new  
21 cohort incorporating these measures is exceptionally expensive and would have set back the  
22 availability of such data by decades, at a time when other prominent efforts to do so  
23 internationally have failed.<sup>85 86</sup> Other internationally significant efforts, such as the US  
24 Environmental Influences On Child Health Outcomes (ECHO) Program,<sup>87</sup> are now taking a  
25 similar approach to CheckPoint. For example, ECHO is enriching existing traditional child  
26 cohorts with additional cutting-edge biophysical modules and forward harmonisation. This will  
27 add great value to these cohorts and to knowledge that can be generated from their  
28 interrogation.

29  
30  
31  
32  
33  
34  
35  
36  
37 In the study's first decade, over 500 papers have been published using LSAC data. Child health  
38 is one of the most common topics of LSAC papers,<sup>81</sup> and many of these health-related research  
39 questions could be extended upon now that the CheckPoint data are available. For example,  
40 research papers on the parent-reported health comorbidities of overweight<sup>88</sup> or short sleep  
41 duration<sup>89</sup> published by our group could be extended to include comprehensive objective  
42 measures of segmental body composition, 24-hour time-use including sleep and a range of  
43 health outcomes (e.g. serum blood parameters, arterial structure and function). The greater  
44 precision brought by using these measures may reveal nuances in the associations not  
45 detectable using reported measures. Many new health-related questions are also now able to be  
46 examined, as LSAC's broad range of early life exposures are reflected in peripubertal metabolic  
47 health and development of a wide range of body systems. In addition, the CheckPoint dataset  
48 will be augmented with genetic data in late 2019, which will facilitate gene-environment  
49 analyses for the first time in this cohort.



1  
2  
3 **In summary**, the efficient addition of objective health measures and biospecimens into the  
4 open-access LSAC repository greatly increases the utility of this widely-used dataset. Analysis  
5 of the CheckPoint data holds great promise in integrating cutting-edge measures of mid-  
6 childhood physiology with lifetime trajectories of mental and physical health, growth,  
7 behaviour and healthcare within a single population study. The data's utility will continue to  
8 grow as ongoing waves of the main LSAC study accrue into adulthood, when CheckPoint  
9 health data will be able to be examined both as outcomes of early life exposures (LSAC waves  
10 1-6) and predictors of later life health (LSAC waves 7 onward).  
11  
12  
13  
14  
15  
16  
17  
18  
19  
20  
21  
22  
23  
24  
25  
26  
27  
28  
29  
30  
31  
32  
33  
34  
35  
36  
37  
38  
39  
40  
41  
42  
43  
44  
45  
46  
47  
48  
49  
50  
51  
52  
53  
54  
55  
56  
57  
58  
59  
60

For peer review only

1  
2  
3 **ACKNOWLEDGEMENTS:** This paper uses unit record data from *Growing Up in Australia*,  
4 the Longitudinal Study of Australian Children. The study is conducted in partnership between  
5 the Department of Social Services (DSS), the Australian Institute of Family Studies (AIFS)  
6 and the Australian Bureau of Statistics (ABS). The findings and views reported in this paper  
7 are those of the authors and should not be attributed to DSS, AIFS or the ABS.  
8  
9

10  
11  
12 REDCap (Research Electronic Data Capture) electronic data capture tools were used in this  
13 study. More information about this software can be found at: [www.project-redcap.org](http://www.project-redcap.org).  
14

15  
16 We thank the LSAC and CheckPoint study participants, staff and students for their  
17 contributions. In particular, we thank the CheckPoint team members Richard Liu, John  
18 Nguyen, Elissa Phillips, Anna Czajko and Josh Muller who made important contributions to  
19 the study.  
20  
21  
22  
23

24  
25  
26 **COMPETING INTERESTS:** All authors have completed the ICMJE uniform disclosure  
27 form at [www.icmje.org/coi\\_disclosure.pdf](http://www.icmje.org/coi_disclosure.pdf) and declare financial support for the submitted  
28 work from the National Health and Medical Research Council of Australia, The Royal  
29 Children's Hospital Foundation, the Murdoch Children's Research Institute, The University of  
30 Melbourne, the National Heart Foundation of Australia, Financial Markets Foundation for  
31 Children and the Victoria Deaf Education Institute. Personal fees were received by MW, PA,  
32 MS and SZ from the Australian Department of Social Services. MW, DPB, FKM, KLy and LG  
33 are supported by the NHMRC; DPB and KLy by the National Heart Foundation of Australia;  
34 and MW by Cure Kids New Zealand. MW received grants from NZ Ministry of Business,  
35 Innovation & Employment and A Better Start/Cure Kids New Zealand, and support from  
36 Sandoz to present at a symposium outside the submitted work.  
37  
38  
39  
40  
41  
42  
43  
44  
45  
46  
47

48 **FUNDING:** This work was supported by the National Health and Medical Research Council  
49 (NHMRC) of Australia (Project Grants 1041352, 1109355), The Royal Children's Hospital  
50 Foundation (2014-241), the Murdoch Children's Research Institute, The University of  
51 Melbourne, the National Heart Foundation of Australia (100660), Financial Markets  
52 Foundation for Children (2014-055, 2016-310) and the Victoria Deaf Education Institute. The  
53 urinary albumin and creatinine quantification was funded through NHMRC Program Grant  
54 633003 Screening and Test Evaluation Program.  
55  
56  
57  
58  
59  
60

1  
2  
3 The following authors were supported by the NHMRC: Senior Research Fellowships to MW  
4 (1046518) and DPB (1064629); Career Development Fellowship to FKM (1111160); Early  
5 Career Fellowship to KLy (1091124) and LG (1035100). The following authors were supported  
6  
7 by the National Heart Foundation of Australia: Honorary Future Leader Fellowship to DPB  
8 (100369); Postdoctoral Fellowship to KLy (101239). MW is supported by Cure Kids New  
9 Zealand.

10  
11  
12  
13  
14 The MCRI administered the research grants for the study and provided infrastructural support  
15 (IT and biospecimen management) to its staff and the study, but played no role in the conduct  
16 or analysis of the trial. DSS played a role in study design; however, no other funding bodies  
17 had a role in the study design and conduct; data collection, management, analysis, and  
18 interpretation; preparation, review, or approval of the manuscript; and decision to submit the  
19 manuscript for publication.  
20  
21  
22  
23  
24  
25  
26

27 **CONTRIBUTIONS:** SAC is the study project manager, and planned and conducted the  
28 analyses, and drafted the initial manuscript. PA, LAB, DPB, JBC, MC, TD, BE, LG, JAK,  
29 FKM, TSO, SR, HR, RS, MS, PJS, LS, TYW and SRZ are study investigators involved in the  
30 conception and oversight of the Child Health CheckPoint, and provided expert advice and  
31 critical review of this manuscript. SD, SE, ANG, ACG, KLy and KLa are study staff or  
32 postdoctoral fellows and provided critical review of this manuscript. MW is the Principal  
33 Investigator of the Child Health CheckPoint, planned the analyses and provided critical review  
34 of this manuscript.  
35  
36  
37  
38  
39  
40  
41  
42  
43

44 **DATA SHARING STATEMENT:** Dataset and technical documents available from *Growing*  
45 *Up in Australia*: The Longitudinal Study of Australian Children via low-cost license for bone  
46 fide researchers. More information is available at [www.growingupinaustralia.gov.au](http://www.growingupinaustralia.gov.au)  
47  
48  
49  
50

#### 51 **FIGURE CAPTIONS AND FOOTNOTES:**

#### 52 **Figure 1. Participant flow chart**

53  
54 N = number of families. LSAC: Longitudinal Study of Australian Children.  
55  
56  
57  
58  
59  
60

## Figure 2. Assessment sequence, by participant and visit type

Oblong box indicates child and parent attended the station together. Parents attended the *Young Bloods* stations twice; first for their own blood collection, then to accompany their child. *Food Stop* included consumption experiment at the Main Assessment Centre (ie data collected), but was simply offering refreshments at the Mini Assessment Centre (ie no data collected). The NIH Vocabulary Picture Test was administered in *Bone Zone* at the Main Assessment Centre, and as part of *Sit and Click* in Mini Assessment Centre and home visits. In home visits, *Sit and Click* (child questionnaire) had allocated time between other assessments; for the Assessment Centre visits, *Sit and Click* didn't have an allocated time or physical location (children completed the questionnaire in downtime at other stations). Post-visit activities (ie accelerometry, child follow-up phone interview and non-attending parent buccal swab) are not included in the diagram and followed the same protocol regardless of visit type.

## SUPPLEMENTARY DOCUMENTS

### Supplementary figure 1. Assessment centre and home visit locations

Values are number of families assessed. Main Assessment Centre locations are labelled in uppercase letters and blue colour. Mini Assessment Centre locations are labelled in sentence case letters and black colour. Home visits occurred in many locations, so the total number of home visits in each state or territory is provided inside the house symbol. No home visits occurred in the Australian Capital Territory.

## REFERENCES

1. Shonkoff JP. Building a new biodevelopmental framework to guide the future of early childhood policy. *Child Dev* 2010;81(1):357-67.
2. Khoury MJ, Lam TK, Ioannidis JP, et al. Transforming epidemiology for 21st century medicine and public health. *Cancer Epidemiol Biomarkers Prev* 2013;22(4):508-16.
3. Lauer MS, Gordon D, Wei G, et al. Efficient design of clinical trials and epidemiological research: is it possible? *Nat Rev Cardiol* 2017;14(8):493-501.
4. Connelly R, Platt L. Cohort profile: UK Millennium Cohort Study (MCS). *Int J Epidemiol* 2014;43(6):1719-25.
5. Greene S, Williams J, Layte R, et al. Growing Up in Ireland Background and Conceptual Framework. Dublin, Ireland: Office of the Minister for Children and Youth Affairs, Department of Health and Children 2010.
6. Morton SM, Atatoa Carr PE, Grant CC, et al. Cohort profile: growing up in New Zealand. *Int J Epidemiol* 2013;42(1):65-75.
7. Soh SE, Tint MT, Gluckman PD, et al. Cohort profile: Growing Up in Singapore Towards healthy Outcomes (GUSTO) birth cohort study. *Int J Epidemiol* 2014;43(5):1401-9.
8. Sanson A, Johnstone R, The LSAC Research Consortium & FaCS LSAC Project Team. Growing Up in Australia takes its first steps. *Family Matters* 2004;67:46-53.
9. Wake M. Tracking the health of the next generation: Sax Institute; 2016 [Available from: <https://www.saxinstitute.org.au/news/tracking-the-health-of-the-next-generation/>].
10. Soloff C, Lawrence D, Johnstone R. LSAC technical paper number 1: Sample design. Melbourne: Australian Institute of Family Studies, 2005.

11. Cusack B, Defina R. LSAC technical paper number 10: Wave 5 weighting and non response. Melbourne: Australian Institute of Family Studies, 2013.
12. Welsh L, Kathriachchige G, Raheem T, et al. Spirometry: Population epidemiology and concordance in 11-12 year old Australians and their parents. Submitted to BMJ Open October 2017.
13. Vlok J, Simm PJ, Clifford SA, et al. Bone health (pQCT): Population epidemiology and concordance in 11-12 year old Australians and their parents. Submitted to BMJ Open October 2017.
14. Vivarini P, Kerr JA, Grobler A, et al. Food choices: Population epidemiology and concordance in 11-12 year old Australians and their parents. Submitted to BMJ Open October 2017.
15. Smith J, Wang J, Grobler A, et al. Hearing, speech reception, vocabulary and language: Population epidemiology and concordance in 11-12 year old Australians and their parents. Submitted to BMJ Open October 2017.
16. Nguyen MT, Lycett K, Vryer R, et al. Telomere length: Population epidemiology and concordance in 11-12 year old Australians and their parents. Submitted to BMJ Open October 2017.
17. Matricciani L, Fraysse F, Grobler A, et al. Sleep and Time Use: Population epidemiology and concordance in 11-12 year old Australians and their parents. Submitted to BMJ Open October 2017.
18. Liu RS, Dunn S, Grobler A, et al. Carotid artery intima-media thickness, distensibility, and elasticity: Population epidemiology and concordance in Australian 11-12 year old Australians and their parents. Submitted to BMJ Open October 2017.
19. Larkins N, Kim S, Carlin J, et al. Albuminuria: Population epidemiology and concordance in 11-12 year old Australians and their parents. Submitted to BMJ Open October 2017.
20. Kahn F, Wake M, Lycett K, et al. Vascular function and stiffness: Population epidemiology and concordance in 11-12 year old Australians and their parents. Submitted to BMJ Open October 2017.
21. Fraysse F, Grobler A, Muller J, et al. Physical activity and sedentary activity: Population epidemiology and concordance in 11-12 year old Australians and their parents. Submitted to BMJ Open October 2017.
22. Ellul S, Wake M, Clifford SA, et al. Metabolomics: Population epidemiology and concordance in 11-12 year old Australians and their parents. Submitted to BMJ Open October 2017.
23. Dascalu J, Lui M, Lycett K, et al. Micro-vascular health (retinal microvasculature): Population epidemiology and concordance in 11-12 year old Australians and their parents. Submitted to BMJ Open October 2017.
24. Clifford SA, Gillespie AN, Grobler A, et al. Body composition: Population epidemiology and concordance in 11-12 year old Australians and their parents. Submitted to BMJ Open October 2017.
25. Catchpool M, Gold L, Grobler A, et al. Health-related quality of life: Population epidemiology and concordance in 11-12 year old Australians and their parents. Submitted to BMJ Open October 2017.
26. Boyd A, Golding J, Macleod J, et al. Cohort Profile: the 'children of the 90s'--the index offspring of the Avon Longitudinal Study of Parents and Children. *Int J Epidemiol* 2013;42(1):111-27.
27. Straker L, Mountain J, Jacques A, et al. Cohort Profile: The Western Australian Pregnancy Cohort (Raine) Study-Generation 2. *Int J Epidemiol* 2017;46(5):1384-85j.

28. Australian Institute of Family Studies. Longitudinal Study of Australian Children Data User Guide - November 2015. Melbourne: Australian Institute of Family Studies, 2015.
29. Wake M, Canterford L, Nicholson J, et al. Options for physical and biomarker augmentation in LSAC: Discussion paper, 2008.
30. Wake M, Gallagher S, Poulakis Z, et al. The Parent Education and Support (PEAS) Program: Final report. Melbourne, Australia: Centre for Community Child Health, Royal Children's Hospital, 2003.
31. Wake M, Baur LA, Gerner B, et al. Outcomes and costs of primary care surveillance and intervention for overweight or obese children: the LEAP 2 randomised controlled trial. *BMJ* 2009;339:b3308.
32. Wake M, Lycett K, Sabin MA, et al. A shared-care model of obesity treatment for 3-10 year old children: Protocol for the HopSCOTCH randomised controlled trial. *BMC Pediatr* 2012;12(1):39.
33. Hanvey AN, Mensah FK, Clifford SA, et al. Adolescent Cardiovascular Functional and Structural Outcomes of Growth Trajectories from Infancy: Prospective Community-Based Study. *Childhood Obes* 2017;13(2):154-63.
34. Hanvey AN, Clifford SA, Mensah FK, et al. Which body composition measures are associated with cardiovascular function and structure in adolescence? *Obesity Medicine* 2016;3:20-27.
35. Marfell-Jones M, Olds T, Stewart A, et al. *International Standards for Anthropometric Assessment*. Potchefstroom, RSA: North-West University, 2006.
36. World Health Organization. Physical status: The use of and interpretation of anthropometry: report of a WHO expert committee. WHO Technical Report Series. Geneva, 1995.
37. Morris NM, Udry JR. Validation of a self-administered instrument to assess stage of adolescent development. *J Youth Adolesc* 1980;9(3):271-80.
38. Petersen AC, Crockett L, Richards M, et al. A self-report measure of pubertal status: Reliability, validity, and initial norms. *J Youth Adolesc* 1988;17(2):117-33.
39. Tan JKL, Tang J, Fung K, et al. Development and Validation of a Comprehensive Acne Severity Scale. *J Cutan Med Surg* 2007;11(6):211-16.
40. Moyer-Mileur LJ, Quick JL, Murray MA. Peripheral quantitative computed tomography of the tibia: pediatric reference values. *J Clin Densitom* 2008;11(2):283-94.
41. Zemel BS. Quantitative computed tomography and computed tomography in children. *Curr Osteoporos Rep* 2011;9(4):284-90.
42. Stein JH, Korcarz CE, Hurst RT, et al. Use of carotid ultrasound to identify subclinical vascular disease and evaluate cardiovascular disease risk: a consensus statement from the American Society of Echocardiography Carotid Intima-Media Thickness Task Force endorsed by the Society for Vascular Medicine. *J Am Soc Echocardiogr* 2008;21(2):93-111.
43. Touboul P-J, Hennerici M, Meairs S, et al. Mannheim carotid intima-media thickness and plaque consensus (2004–2006–2011). *Cerebrovasc Dis* 2012;34(4):290-96.
44. Laurent S, Cockcroft J, Van Bortel L, et al. Expert consensus document on arterial stiffness: methodological issues and clinical applications. *Eur Heart J* 2006;27(21):2588-605.
45. Zhang A-J, Yu X-J, Wang M. The clinical manifestations and pathophysiology of cerebral small vessel disease. *Neurosci Bull* 2010;26(3):257-64.
46. Miller M, Hankinson J, Brusasco V, et al. Standardisation of spirometry. *Eur Respir J* 2005;26:319-38.

- 1
- 2
- 3
- 4 47. Semel E, Wiig E, Secord W. Clinical evaluation of language fundamentals, fourth edition,  
5 Australian standardised edition (CELF-4 Australian). Harcourt Assessment, Marrickville  
6 (Australia), 2006.
- 7 48. Weintraub S, Dikmen SS, Heaton RK, et al. Cognition assessment using the NIH  
8 Toolbox. *Neurology* 2013;80(11 Supplement 3):S54-S64.
- 9 49. Niskar AS, Kieszak SM, Holmes A, et al. Prevalence of hearing loss among children 6 to  
10 19 years of age: The Third National Health and Nutrition Examination Survey. *JAMA*  
11 1998;279(14):1071-75.
- 12 50. Wake M, Poulakis Z, Hughes E, et al. Hearing impairment: A population study of age at  
13 diagnosis, severity, and language outcomes at 7–8 years. *Arch Dis Child* 2005;90(3):238-  
14 44.
- 15 51. Cone BK, Wake M, Tobin S, et al. Slight-mild sensorineural hearing loss in children:  
16 audiometric, clinical, and risk factor profiles. *Ear Hear* 2010;31(2):202-12.
- 17 52. Cameron S, Glyde H, Dillon H. Listening in Spatialized Noise-Sentences Test (LiSN-S):  
18 normative and retest reliability data for adolescents and adults up to 60 years of age. *J*  
19 *Am Acad Audiol* 2011;22(10):697-709.
- 20 53. National Acoustic Laboratories. Listening in Spatialised Noise Sentences Test (LiSN-S)  
21 2016 [Available from: <https://capd.nal.gov.au/lisn-s-about.shtml>].
- 22 54. Esliger DW, Rowlands AV, Hurst TL, et al. Validation of the GENE Accelerometer.  
23 *Med Sci Sports Exerc* 2011;43(6):1085-93.
- 24 55. Olds TS, Ridley K, Dollman J, et al. The validity of a computerized use of time recall, the  
25 multimedia activity recall for children and adolescents. *Pediatr Exerc Sci* 2010;22(1):34-  
26 43.
- 27 56. Ridley K, Ainsworth BE, Olds TS. Development of a compendium of energy  
28 expenditures for youth. *Int J Behav Nutr Phys Act* 2008;5:45.
- 29 57. Foley LS, Maddison R, Rush E, et al. Doubly labeled water validation of a computerized  
30 use-of-time recall in active young people. *Metabolism* 2013;62(1):163-9.
- 31 58. Ortega FB, Ruiz JR, Castillo MJ, et al. Physical fitness in childhood and adolescence: a  
32 powerful marker of health. *Int J Obes (Lond)* 2008;32(1):1-11.
- 33 59. Boreham CA, Paliczka VJ, Nichols AK. A comparison of the PWC170 and 20-MST tests  
34 of aerobic fitness in adolescent schoolchildren. *J Sports Med Phys Fitness*  
35 1990;30(1):19-23.
- 36 60. Bach M. The Freiburg Visual Acuity test: Automatic measurement of visual acuity.  
37 *Optom Vis Sci* 1996;73(1):49-53.
- 38 61. Elliot J, Morrow V. *Imagining the Future: Preliminary analysis of NCDS essays written*  
39 *by children at age 11.* London: Centre for Longitudinal Studies, 2007.
- 40 62. Seligson JL, Huebner ES, Valois RF. Preliminary Validation of the Brief  
41 Multidimensional Students' Life Satisfaction Scale (BMSLSS). *Social Indicators*  
42 *Research* 2003;61(2):121.
- 43 63. Children's Worlds: International Survey of Children's Well-Being 2017 [Available from:  
44 <http://iscweb.org>].
- 45 64. Varni JW, Seid M, Kurtin PS. PedsQL 4.0: reliability and validity of the Pediatric Quality  
46 of Life Inventory version 4.0 generic core scales in healthy and patient populations. *Med*  
47 *Care* 2001;39(8):800-12.
- 48 65. Richardson J, Iezzi A, Khan MA, et al. Validity and Reliability of the Assessment of  
49 Quality of Life (AQoL)-8D Multi-Attribute Utility Instrument. *The Patient - Patient-*  
50 *Centered Outcomes Research* 2014;7(1):85-96.
- 51 66. Stevens K. Assessing the performance of a new generic measure of health-related quality  
52 of life for children and refining it for use in health state valuation. *Appl Health Econ*  
53 *Health Policy* 2011;9(3):157-69.
- 54
- 55
- 56
- 57
- 58
- 59
- 60

- 1
- 2
- 3
- 4 67. Derogatis LR, Lipman RS, Covi L. SCL-90: an outpatient psychiatric rating scale--  
5 preliminary report. *Psychopharmacol Bull* 1973;9(1):13-28.
- 6 68. Jones GT, Watson KD, Silman AJ, et al. Predictors of low back pain in British  
7 schoolchildren: A population-based prospective cohort study. *Pediatrics* 2003;111(4 Pt  
8 1):822-8.
- 9 69. Flood VM, Webb K, Rangan A. Recommendations for short questions to assess food  
10 consumption in children for the NSW Health Surveys. 2005.
- 11 70. Saloheimo T, González S, Erkkola M, et al. The reliability and validity of a short food  
12 frequency questionnaire among 9–11-year olds: a multinational study on three middle-  
13 income and high-income countries. *Int J Obes Suppl* 2015;5:S22-S28.
- 14 71. Koplin JJ, Wake M, Dharmage SC, et al. Cohort Profile: The HealthNuts Study:  
15 Population prevalence and environmental/genetic predictors of food allergy. *Int J*  
16 *Epidemiol* 2015;44(4):1161-71.
- 17 72. Peters RL, Koplin JJ, Gurrin LC, et al. The prevalence of food allergy and other allergic  
18 diseases in early childhood in a population-based study: HealthNuts age 4-year follow-  
19 up. *J Allergy Clin Immunol* 2017.
- 20 73. Pezic A, Ponsonby AL, Cameron FJ, et al. Constitutive and relative facultative skin  
21 pigmentation among Victorian children including comparison of two visual skin charts  
22 for determining constitutive melanin density. *Photochem Photobiol* 2013;89(3):714-23.
- 23 74. Australian Institute of Family Studies. Longitudinal Study of Australian Children Data  
24 User Guide - November 2013. Melbourne: Australian Institute of Family Studies, 2013.
- 25 75. Davies S, Clifford SA, Gillespie A, et al. LSAC's Child Health CheckPoint Data Issues  
26 Paper 2018. Melbourne, Australia: Murdoch Children's Research Institute, 2017.
- 27 76. Wake M, Clifford SA, York E, et al. Introducing Growing Up in Australia's Child Health  
28 CheckPoint. *Family Matters* 2014;94:15-23.
- 29 77. Harris PA, Taylor R, Thielke R, et al. Research electronic data capture (REDCap) - A  
30 metadata-driven methodology and workflow process for providing translational research  
31 informatics support. *J Biomed Inform* 2009;42(2):377-81.
- 32 78. Soininen P, Kangas AJ, Wurtz P, et al. High-throughput serum NMR metabonomics for  
33 cost-effective holistic studies on systemic metabolism. *Analyst* 2009;134(9):1781-5.
- 34 79. Kettunen J, Tukiainen T, Sarin AP, et al. Genome-wide association study identifies  
35 multiple loci influencing human serum metabolite levels. *Nat Genet* 2012;44(3):269-76.
- 36 80. Ellul S, Hiscock R, Mensah FK, et al. Longitudinal Study of Australian Children's Child  
37 Health CheckPoint Technical Paper 1: Weighting and Non-Response. . Melbourne:  
38 Murdoch Children's Research Institute, 2018.
- 39 81. Edwards B. Growing Up in Australia: The Longitudinal Study of Australian Children  
40 Entering adolescence and becoming a young adult. *Family Matters* 2014;95:5-14.
- 41 82. Australian Bureau of Statistics. Australian Statistical Geography Standard (ASGS):  
42 Volume 5 - Remoteness Structure, July 2011 (cat. no. 1270.0.55.005): Australian Bureau  
43 of Statistics, 2011.
- 44 83. Blakemore T, Strazdins L, Gibbings J. Measuring family socioeconomic position.  
45 *Australian Social Policy No 8* 2009:121-68.
- 46 84. Australian Bureau of Statistics. Census of Population and Housing: Socio-Economic  
47 Indexes for Areas (SEIFA) Australia 2011 (cat. no. 2033.0.55.001) [Available from:  
48 <http://www.abs.gov.au/websitedbs/censushome.nsf/home/seifa2011>].
- 49 85. Pearson H. Massive UK baby study cancelled. *Nature* 2015;526:620-21.
- 50 86. Landrigan PJ, Baker DB. The National Children's Study--end or new beginning? *N Engl J*  
51 *Med* 2015;372(16):1486-7.
- 52 87. Schmidt CW. Growing a New Study: Environmental Influences on Child Health  
53 Outcomes. *Environ Health Perspect* 2015;123(10):A260-3.
- 54
- 55
- 56
- 57
- 58
- 59
- 60



- 1  
2  
3 88. Wake M, Clifford SA, Patton GC, et al. Morbidity patterns among the underweight,  
4 overweight and obese between 2 and 18 years: population-based cross-sectional  
5 analyses. *Int J Obes (Lond)* 2013;37(1):86-93.  
6  
7 89. Price AMH, Quach J, Wake M, et al. Cross-sectional sleep thresholds for optimal health  
8 and well-being in Australian 4-9-year-olds. *Sleep Med* 2016;22:83-90.  
9  
10  
11  
12  
13  
14  
15  
16  
17  
18  
19  
20  
21  
22  
23  
24  
25  
26  
27  
28  
29  
30  
31  
32  
33  
34  
35  
36  
37  
38  
39  
40  
41  
42  
43  
44  
45  
46  
47  
48  
49  
50  
51  
52  
53  
54  
55  
56  
57  
58  
59  
60

For peer review only

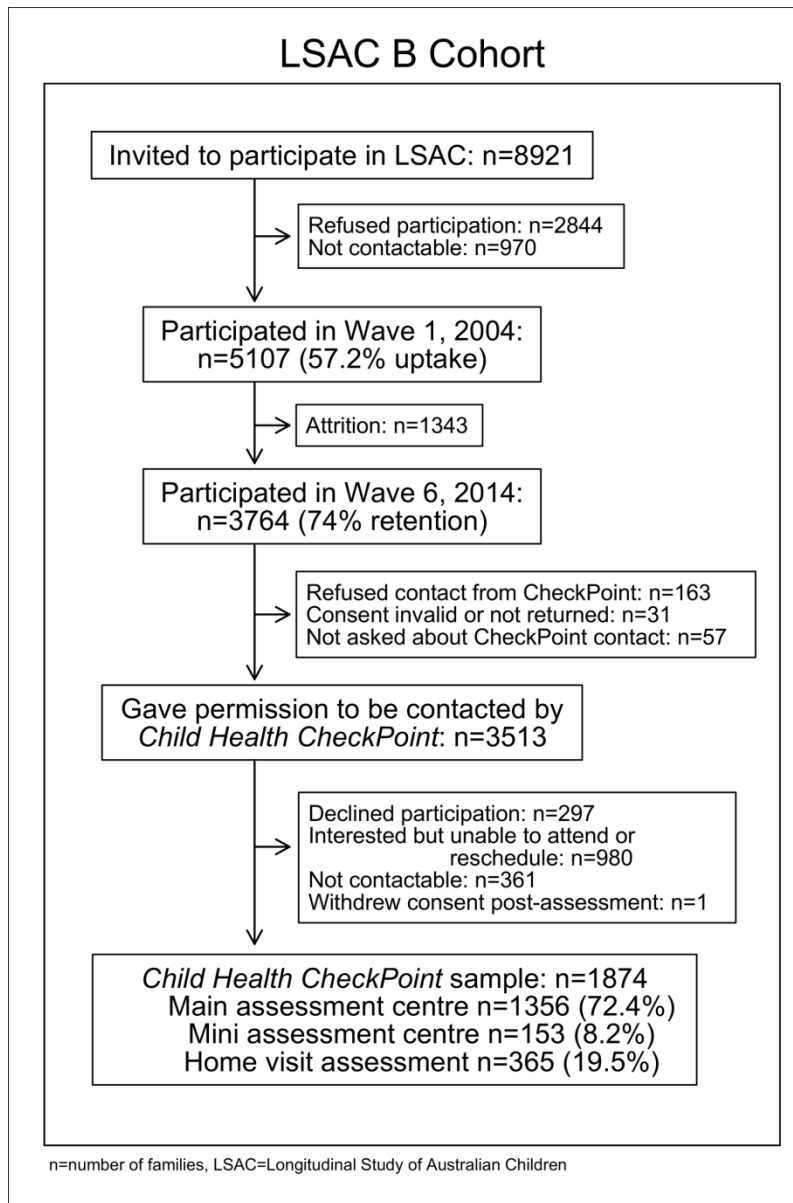

Figure 1. Participant flow chart  
 N = number of families. LSAC: Longitudinal Study of Australian Children.

76x114mm (600 x 600 DPI)

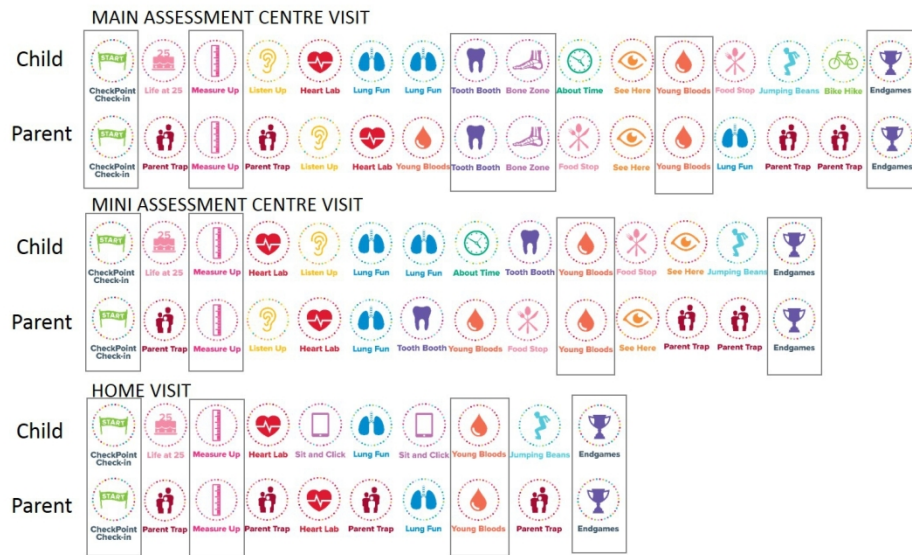

27 Figure 2. Assessment sequence, by participant and visit type  
 28 Oblong box indicates child and parent attended the station together. Parents attended the Young Bloods  
 29 stations twice; first for their own blood collection, then to accompany their child. Food Stop included  
 30 consumption experiment at the Main Assessment Centre (ie data collected), but was simply offering  
 31 refreshments at the Mini Assessment Centre (ie no data collected). The NIH Vocabulary Picture Test was  
 32 administered in Bone Zone at the Main Assessment Centre, and as part of Sit and Click in Mini Assessment  
 33 Centre and home visits. In home visits, Sit and Click (child questionnaire) had allocated time between other  
 34 assessments; for the Assessment Centre visits, Sit and Click didn't have an allocated time or physical  
 35 location (children completed the questionnaire in downtime at other stations). Post-visit activities (ie  
 36 accelerometry, child follow-up phone interview and non-attending parent buccal swab) are not included in  
 37 the diagram and followed the same protocol regardless of visit type.

38 137x85mm (300 x 300 DPI)

1  
2  
3  
4  
5  
6  
7  
8  
9  
10  
11  
12  
13  
14  
15  
16  
17  
18  
19  
20  
21  
22  
23  
24  
25  
26  
27  
28  
29  
30  
31  
32  
33  
34  
35  
36  
37  
38  
39  
40  
41  
42  
43  
44  
45  
46  
47  
48  
49  
50  
51  
52  
53  
54  
55  
56  
57  
58  
59  
60

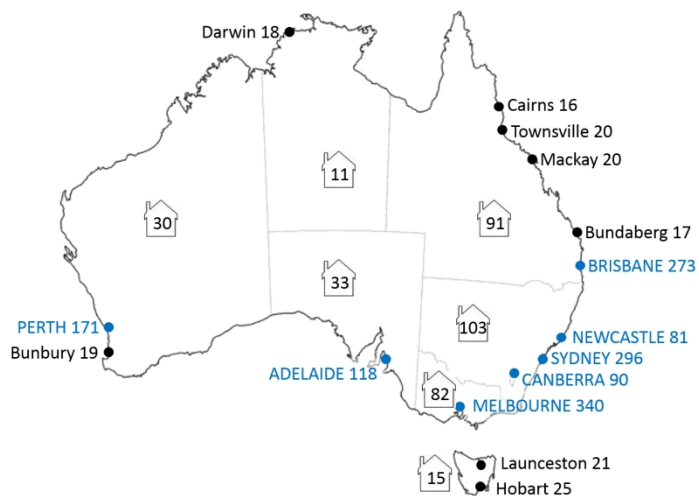

169x95mm (300 x 300 DPI)

STROBE Statement—checklist of items that should be included in reports of observational studies  
**Paper title: Child Health CheckPoint: Cohort summary and methodology of a physical health and biospecimen module for the Longitudinal Study of Australian Children.**

Please note: page numbers The page numbers in the right-hand column relate to the page numbers found in the footer of the marked-up version of the manuscript.

|                              | Item No | Recommendation                                                                                                                                                                                                                                                               | Page number                        |
|------------------------------|---------|------------------------------------------------------------------------------------------------------------------------------------------------------------------------------------------------------------------------------------------------------------------------------|------------------------------------|
| <b>Title and abstract</b>    | 1       | (a) Indicate the study's design with a commonly used term in the title or the abstract                                                                                                                                                                                       | 1,3                                |
|                              |         | (b) Provide in the abstract an informative and balanced summary of what was done and what was found                                                                                                                                                                          | 3                                  |
| <b>Introduction</b>          |         |                                                                                                                                                                                                                                                                              |                                    |
| Background/rationale         | 2       | Explain the scientific background and rationale for the investigation being reported                                                                                                                                                                                         | 5-7                                |
| Objectives                   | 3       | State specific objectives, including any prespecified hypotheses                                                                                                                                                                                                             | 6-7                                |
| <b>Methods</b>               |         |                                                                                                                                                                                                                                                                              |                                    |
| Study design                 | 4       | Present key elements of study design early in the paper                                                                                                                                                                                                                      | 7-9                                |
| Setting                      | 5       | Describe the setting, locations, and relevant dates, including periods of recruitment, exposure, follow-up, and data collection                                                                                                                                              | 7-9,<br>Figure 1, Supp<br>Figure 1 |
| Participants                 | 6       | (a) <i>Cohort study</i> —Give the eligibility criteria, and the sources and methods of selection of participants. Describe methods of follow-up<br>(b) <i>Cross-sectional study</i> —Give the eligibility criteria, and the sources and methods of selection of participants | 7-8                                |
| Variables                    | 7       | Clearly define all outcomes, exposures, predictors, potential confounders, and effect modifiers. Give diagnostic criteria, if applicable                                                                                                                                     | 10-17,<br>19-20                    |
| Data sources/<br>measurement | 8*      | For each variable of interest, give sources of data and details of methods of assessment (measurement). Describe comparability of assessment methods if there is more than one group                                                                                         | 10-17                              |
| Bias                         | 9       | Describe any efforts to address potential sources of bias                                                                                                                                                                                                                    | 20                                 |
| Study size                   | 10      | Explain how the study size was arrived at                                                                                                                                                                                                                                    | 19,<br>Figure 1                    |
| Quantitative variables       | 11      | Explain how quantitative variables were handled in the analyses. If applicable, describe which groupings were chosen and why                                                                                                                                                 | 21                                 |
| Statistical methods          | 12      | (a) Describe all statistical methods, including those used to control for confounding                                                                                                                                                                                        | 20                                 |
|                              |         | (b) Describe any methods used to examine subgroups and interactions                                                                                                                                                                                                          | N/A                                |
|                              |         | (c) Explain how missing data were addressed                                                                                                                                                                                                                                  | N/A                                |
|                              |         | (d) <i>Cohort study</i> —If applicable, explain how loss to follow-up was addressed                                                                                                                                                                                          | 20-21                              |
|                              |         | (e) Describe any sensitivity analyses                                                                                                                                                                                                                                        | N/A                                |

|                          |     |                                                                                                                                                                                                              | <b>Page<br/>number</b> |
|--------------------------|-----|--------------------------------------------------------------------------------------------------------------------------------------------------------------------------------------------------------------|------------------------|
| <b>Results</b>           |     |                                                                                                                                                                                                              |                        |
| Participants             | 13* | (a) Report numbers of individuals at each stage of study—eg numbers potentially eligible, examined for eligibility, confirmed eligible, included in the study, completing follow-up, and analysed            | 21,<br>Figure 1        |
|                          |     | (b) Give reasons for non-participation at each stage                                                                                                                                                         | 21,<br>Figure 1        |
|                          |     | (c) Consider use of a flow diagram                                                                                                                                                                           | Figure 1               |
| Descriptive data         | 14* | (a) Give characteristics of study participants (eg demographic, clinical, social) and information on exposures and potential confounders                                                                     | 21-23                  |
|                          |     | (b) Indicate number of participants with missing data for each variable of interest                                                                                                                          | 25-26,<br>28           |
|                          |     | (c) <i>Cohort study</i> —Summarise follow-up time (eg, average and total amount)                                                                                                                             | Figure 1               |
| Outcome data             | 15* | <i>Cohort study</i> —Report numbers of outcome events or summary measures over time                                                                                                                          | N/A                    |
|                          |     | <i>Cross-sectional study</i> —Report numbers of outcome events or summary measures                                                                                                                           | N/A                    |
| Main results             | 16  | (a) Give unadjusted estimates and, if applicable, confounder-adjusted estimates and their precision (eg, 95% confidence interval). Make clear which confounders were adjusted for and why they were included | 24, 27                 |
|                          |     | (b) Report category boundaries when continuous variables were categorized                                                                                                                                    | N/A                    |
|                          |     | (c) If relevant, consider translating estimates of relative risk into absolute risk for a meaningful time period                                                                                             | N/A                    |
| Other analyses           | 17  | Report other analyses done—eg analyses of subgroups and interactions, and sensitivity analyses                                                                                                               | N/A                    |
| <b>Discussion</b>        |     |                                                                                                                                                                                                              |                        |
| Key results              | 18  | Summarise key results with reference to study objectives                                                                                                                                                     | 29                     |
| Limitations              | 19  | Discuss limitations of the study, taking into account sources of potential bias or imprecision. Discuss both direction and magnitude of any potential bias                                                   | 29-30                  |
| Interpretation           | 20  | Give a cautious overall interpretation of results considering objectives, limitations, multiplicity of analyses, results from similar studies, and other relevant evidence                                   | 30-31                  |
| Generalisability         | 21  | Discuss the generalisability (external validity) of the study results                                                                                                                                        | N/A                    |
| <b>Other information</b> |     |                                                                                                                                                                                                              |                        |
| Funding                  | 22  | Give the source of funding and the role of the funders for the present study and, if applicable, for the original study on which the present article is based                                                | 32-33                  |

\*Give information separately for cases and controls in case-control studies and, if applicable, for exposed and unexposed groups in cohort and cross-sectional studies.

**Note:** An Explanation and Elaboration article discusses each checklist item and gives methodological background and published examples of transparent reporting. The STROBE checklist is best used in conjunction with this article (freely available on the Web sites of PLoS Medicine at <http://www.plosmedicine.org/>, Annals of Internal Medicine at <http://www.annals.org/>, and Epidemiology at <http://www.epidem.com/>). Information on the STROBE Initiative is available at [www.strobe-statement.org](http://www.strobe-statement.org).
